1 **A personalized network framework reveals predictive axis of anti-TNF**  
2 **response across diseases**

3 Shiran Gerassy-Vainberg<sup>1,2</sup>, Elina Starosvetsky<sup>#1</sup>, Renaud Gaujoux<sup>#1,4</sup>, Alexandra Blatt<sup>\*2</sup>, Naama  
4 Maimon<sup>1,2</sup>, Yuri Gorelik<sup>2</sup>, Sigal Pressman<sup>2</sup>, Ayelet Alpert<sup>1</sup>, Haggai Bar-Yoseph<sup>1,2</sup>, Tania Dubovik<sup>1</sup>, Benny  
5 Perets<sup>1</sup>, Adir Katz<sup>4</sup>, Neta Milman<sup>1</sup>, Yehuda Chowers<sup>\*1,2,3</sup>, Shai S. Shen-Orr<sup>\*1</sup>

6 on behalf of the Israeli IBD research Network (IIRN)

7 #, \* Contributed equally to the study

8

9 **Author affiliations**

10 1. Faculty of Medicine, Technion-Israel Institute of Technology, Haifa, Israel

11 2. Department of Gastroenterology, Rambam Health Care Campus, Haifa, Israel

12 3. Clinical Research Institute, Rambam Health Care Campus, Haifa, Israel

13 4. CytoReason, Tel Aviv 67012, Israel

14

15 **Corresponding author contact information:**

16 Shai Shen-Orr, Faculty of Medicine, Technion-Israel Institute of Technology, Haifa 32000, Israel;

17 [shenorr@technion.ac.il](mailto:shenorr@technion.ac.il) and Yehuda Chowers, Department of Gastroenterology, Rambam Health Care

18 Campus, Haifa, Israel; [y\\_chowers@rambam.health.gov.il](mailto:y_chowers@rambam.health.gov.il).

19

20

## 21 **Abstract**

22 Personalized treatment of complex diseases is an unmet medical need pushing towards drug biomarker  
23 identification of one drug-disease combination at a time. Here, we used a novel computational approach  
24 for modeling cell-centered individual-level network dynamics from high-dimensional blood data to predict  
25 infliximab response and uncover individual variation of non-response. We identified and validated that  
26 the RAC1-PAK1 axis is predictive of infliximab response in inflammatory bowel disease. Intermediate  
27 monocytes, which closely correlated with inflammation state, play a key role in the RAC1-PAK1 responses,  
28 supporting their modulation as a therapeutic target. This axis also predicts response in Rheumatoid  
29 arthritis, validated in three public cohorts. Our findings support pan-disease drug response diagnostics  
30 from blood, implicating common mechanisms of drug response or failure across diseases.

## 31 **Keywords**

32 Precision medicine, Individual-level network analysis, Drug response, Anti-TNF antibodies, Infliximab,  
33 Immune-mediated diseases, Inflammatory bowel disease, Rheumatoid arthritis, Pan-disease drug  
34 response diagnostics.

## 35 **Introduction**

36 Biologic therapies are widely used in a broad range of therapeutic areas including immune-mediated  
37 diseases, oncology and hematology and have demonstrated effectiveness by improving disease clinical  
38 course, morbidity and patient quality of life. However, a sizable fraction of patients does not respond to  
39 therapy and is exposed to the consequences of uncontrolled disease activity, unwanted side effects and  
40 increasing care costs. Therefore, the development of biomarkers for response prediction is an unmet  
41 medical need, necessary for achieving a favorable therapeutic index, cost/benefit ratio and overall  
42 improved patient care. Although biologics' targets are highly specific (e.g. PD1, TNF $\alpha$ ) and target particular  
43 molecular processes across diseases (e.g. CD8 T-cell exhaustion, or TNF induced inflammation), presence  
44 of these processes in an individual patient is necessary but not sufficient to predict response, implying a  
45 more complex therapeutic mechanism which may be disease specific<sup>1,2</sup>.

46 One of the most frequently used biologic drug classes are anti-TNF $\alpha$  antibodies, with sales of over \$US 25  
47 billion per year<sup>3</sup>. Anti-TNF agents are thought to exert their effects through several mechanisms, including  
48 TNF $\alpha$  neutralization, induction of cell and complement cytotoxicity through the FC drug fragment and  
49 cytokine suppression via reverse signaling or apoptosis<sup>4</sup>. Similar to other drugs and across target diseases  
50 including inflammatory bowel disease (IBD) and rheumatoid arthritis (RA), a sizable proportion of 20-40%  
51 of the treated patients, will primarily not-respond to treatment<sup>5,6</sup>.

52 Previous studies used systematic screening of in-house and meta-analysis data for the identification of  
53 biomarkers associated with anti-TNF $\alpha$  treatment failure. Different markers were identified in different  
54 disease contexts<sup>7</sup>. Among these, in IBD, Oncostatin M (OSM) was identified as a potent mucosal  
55 biomarker<sup>8</sup>. This gene correlated closely with Triggering Receptor Expressed On Myeloid Cells 1 (TREM1),  
56 a biomarker found by us, which was predictive of response in biopsy and importantly also in blood, albeit  
57 in an inverted ratio<sup>9</sup>. In RA, myeloid related sICAM1 and CXCL13, and type I IFN activity were associated  
58 with anti-TNF response<sup>10</sup>. The identification of these markers suggests that biomarkers of pretreatment  
59 immune status may be useful for patient screening. However, little is known regarding molecular  
60 dynamics of anti-TNF response and resistance, and whether drug biomarkers are disease dependent, or  
61 represent a patient-specific property which can be generalized across diseases.

62 The availability of high-resolution molecular data provides opportunities for achieving improved modeling  
63 of the complex therapeutic landscape using systems biology and network-based approaches. Yet, most of  
64 the statistical methods used are based on population averages, which do not suffice to fully investigate  
65 these complex diseases. Although several personalized approaches were recently suggested for exploring  
66 sample-level network information<sup>11,12</sup>, these studies were not cell-centered, and did not decouple cell  
67 frequency and cell regulatory program changes. Network structure was used to identify individual  
68 alterations in cross-feature relationships between groups, however, these were validated only in the  
69 unicellular level. The same is true for the identification of individual-level time series analysis.

70 Here we employed a longitudinal cell-centered systems analysis, combining high-dimensional data of  
71 whole blood from anti-TNF responding and non-responding IBD patients at baseline and following two  
72 and fourteen weeks post first treatment. We focused on immune responses in blood, because although  
73 presenting an analytical challenge due to high background noise, blood-biomarkers have a clear  
74 advantage of accessibility and cost-effectiveness for therapeutic purposes. To understand individual  
75 variation in drug resistance, we devised a single sample-based network approach, termed 'Disruption  
76 Networks', which provides patient specific hypotheses for lack of response with respect to a global  
77 response network. Using this approach, we demonstrate that monocytic RAC1-PAK1 axis expression,  
78 which is a final common pathway of multiple immune-receptor signaling cascades, is predictive of anti-  
79 TNF response in IBD as well as for the same treatment in RA, providing validation for the signature's  
80 predictivity and supporting common baseline elements that contribute to response across infliximab (IFX)  
81 treated immune mediated diseases.

82

## 83 **Results**

84 **Treatment response is associated with forward movement along an immune health axis, whereas non-**  
85 **responders regress.**

86 To understand the cellular and molecular changes associated with IFX response and non-response, we  
87 performed longitudinal deep immunophenotyping of peripheral blood in Crohn's disease (CD) patients  
88 who received first-time therapy with IFX during standard clinical care (Fig. 1a, left, hereon IFX cohort).  
89 Patients were profiled a total of three times: pre-treatment (day 0), week 2 (W2) and week 14 (W14) post-  
90 treatment initiation. At W14, 15 patients showed clinical response whereas 9 were classified as non-  
91 responders at the study end (Supp. Table 1 for clinical demographics; see Methods for response  
92 classification).

93 Complementary to this, to define an individual-specific unbiased expectation of peripheral blood immune  
94 dynamics during disease course, we used a public gene expression dataset of whole blood samples from  
95 healthy individuals and 75 IBD patients in varying disease states treated with standard of care drugs (Fig.  
96 1a; see Methods). We constructed an external data-driven reference IBD axis (Fig. 1b, left), which  
97 describes in a dimensionality reduced Principal Component Analysis (PCA) space the molecular transition  
98 from active- through inactive disease to healthy- state, based on differentially expressed genes (hereon  
99 'Health axis', see Methods). Next, we projected the position of our in-house IFX cohort on the PCA (Fig.  
100 1b, right) and calculated the distance each patient traversed on the axis along the course of time,  
101 providing continuous molecular information to characterize a patient's immune state shift (Fig. 1c).  
102 Analyzing the distance between paired sample time-points, we observed that responders progressed on  
103 the health axis (*i.e.*, a positive shift on the axis towards the centroid of healthy reference samples), while  
104 non-responders regressed on it (Figure 1c,  $P < 0.05$ , one-sided permutation test). Breaking up these

105 dynamics by time point, we observed that responders exhibited increased progress along the health axis  
106 following first drug treatment, and reduced progress in the following period (Figure 1c). The negative  
107 correlation between progress along the axis between baseline-W2 and progress in the following segment  
108 W2-W14 suggests that patients progressing to ‘response’ early, slow down during the following visit  
109 whereas those showing a slow progress initially, progress more thereafter (Fig. 1d). Importantly our  
110 results suggest that clinical non-responders are immunologically affected by treatment as well, with an  
111 overall opposite direction from responders’ progress. Collectively, our health axis, captures blood  
112 molecular changes which are clinically relevant for treatment response.

### 113 **Early IFX response reduces expression of innate immune pathways attributed mainly to monocytes** 114 **function.**

115 To identify changes following treatment in each response group, we characterized major immune cell  
116 compositional changes in 16 canonical immune populations (Fig. 2, Supp. Table 2-3 for CyTOF panel and  
117 Citrus clusters annotation). Then, to compare how peripheral blood state differs as a function of treatment  
118 response, we computed a PCA on the fold change of patients’ cell phenotyping profiles (Fig. 2a, left). We  
119 observed significant difference in cell abundance changes between responders and non-responders for  
120 W2 and W14 changes relative to baseline ( $P=0.005$ , NPMANOVA).

121 Multiple cell subset changes in responders were already apparent at W2 including reduced abundance of  
122 monocytes, granulocytes, Tregs, naïve CD4+ T cells, CD4+ central memory T cells and increased abundance  
123 of CD4+ and CD8+ effector memory T cells and B cells ( $FDR\leq 0.15$ , Paired Wilcoxon test; Supp. Fig. 1a).  
124 Based on the PCA loadings we deduced that monocytes and Tregs were the prime drivers of changes  
125 following treatment (Supp. Fig. 1b), evidence for which was also supported by the univariate comparison  
126 showing that monocytes were significantly reduced in responders throughout both W2 and W14, whereas  
127 in non-responders monocyte frequency was unchanged in W2 and elevated at W14 ( $P=0.0015$  and  
128  $P=0.048$  in responders, as opposed to  $P=0.64$  and  $P=0.016$  in non-responders at W2 and W14 respectively,  
129 Paired Wilcoxon test). Moreover, monocyte frequency was also correlated with changes in CRP  
130 (Spearman’s  $r = 0.4$ ,  $P=0.01$ ), suggesting their relevance to treatment response (Fig. 2a center, right and  
131 Supp. Fig. 1c for correlation of CRP with other cell-types). Taken together, our results demonstrate  
132 significant differential cell composition following IFX treatment as a function of response, with monocytes  
133 likely playing a major role.

134 Given the observed cell composition alterations, we performed a cell-centered analysis to identify  
135 changes in transcriptional programs following treatment in each response group, by adjusting the gene  
136 expression for variation in major cell-type proportions. This procedure places focus on detection of  
137 differences between conditions of the gene regulatory programs the cells are undergoing rather than  
138 those differences detected due to cell compositional differences, and has been shown to unmask  
139 additional signal (i.e. false-negative of direct bulk analysis) while decreasing false-positives (Fig. 2b, see  
140 Methods)<sup>9</sup>. In this analysis, we identified 1400 (5.99%) and 589 (2.52%) differential features in responders  
141 ( $FDR<0.15$ , permutation test; Supp. Tables 7) at W2 and W14 compared to baseline respectively,  
142 suggesting enhanced response at W2 followed by reduced dynamics in W14. Compared to responders,  
143 non-responders showed attenuated dynamics in the parallel treatment periods, with only 542 (2.32%,  
144 Supp. Table 7) differential features at W2 compared to baseline, and no significantly detected dynamics  
145 at W14. To ensure the differences in dynamics between the two response groups were not due to sample  
146 size, we subsampled responders to match the non-responder group size and observed that responding  
147 patients exhibit more dynamic changes compared to non-responders (Supp. Fig. 2). Furthermore,



148 comparing the two response groups, we observed only a minor overlap in the post treatment dynamic  
149 features (23 features, 1.2% at W2). In line with the ‘health axis’, these results suggest that there are  
150 increased early dynamics in responders compared to non-responders and that responders and non-  
151 responders presented different alterations following treatment.

152 To understand the relationship during IFX response between gene regulatory programs in a biological  
153 context, we constructed a cell-centered co-expression network, which was expanded by known  
154 interacting genes, followed by functional enrichment analysis (see Methods, Supp. Tables 8 for network  
155 edges and Supp. Fig. 3b for functional enriched pathways respectively). Interestingly, despite this being a  
156 blood-based network, we noted genes which were previously associated with anti-TNF response in IBD  
157 biopsies such as TREM1 and OSM<sup>8,9</sup>, suggesting that relevant signals originally detected in tissue, are also  
158 reflected in blood. We identified potential mediating pathways, i.e. pathways possessing higher  
159 connectivity to other nodes in the response network, using degree and betweenness centrality  
160 measurements (Fig. 2c).

161 We observed that most central pathways associated with the W2 early response were related to the  
162 innate immune system (Supp. Fig. 3b). At the pathway level, consistent with the ‘health axis’ and feature  
163 level analysis, we found augmented response at W2, which was attenuated in the following period (151  
164 vs. 88 enriched dynamic pathways in responders at W2 and W14 respectively; Supp. Fig. 3a-b). As  
165 expected, among the innate related altered functions, we observed pathways related to downregulation  
166 of NF- $\kappa$ B and TNF signaling via NF- $\kappa$ B (Fig. 2c,  $FDR < 0.005$  for W2 vs. baseline pathway score comparison,  
167 by Wilcoxon test;  $FDR < 0.01$  for enrichment in network by GSEA). Pathways with high network centrality  
168 included downregulation of FC receptor signaling and phagocytosis, cytoskeleton organization, Toll-like  
169 receptors (TLRs) and vascular endothelial growth factor (VEGF) signaling responses (Fig. 2c; top 25<sup>th</sup>  
170 percentile for both degree and betweenness;  $FDR < 0.005$  for W2 vs. baseline, by Wilcoxon test;  $FDR < 0.1$   
171 for enrichment by GSEA). These pathways also correlated with CRP measured in the clinical setting  
172 (Spearman’s  $r$   $FDR < 0.05$  and Supp. Fig. 3d). Of note, FCYR is known to be regulated by TNF $\alpha$ <sup>13</sup> and  
173 mediates a number of responses, including the phagocytosis of IgG-coated particles, accompanied by  
174 cytoskeleton rearrangements and phagosome formation, central pathways that were downregulated in  
175 responders (Fig. 2c and Supp. Fig. 3b,  $FDR < 0.001$  for W2 vs. baseline, by Wilcoxon test;  $FDR < 0.15$  for  
176 enrichment by GSEA). We also observed the downregulation of reactive oxygen species (ROS) pathway,  
177 which is crucial for the digestion of engulfed materials in phagosomes ( $FDR < 0.001$  for W2 vs. baseline, by  
178 Wilcoxon test;  $FDR < 0.05$  for enrichment by GSEA). This pathway was also correlated with CRP (Spearman’s  
179  $r$  0.43,  $FDR < 0.005$ , Supp. Fig. 2b and Supp. Fig. 2d). To identify the most likely cell expressing these  
180 pathways, we regressed the unadjusted fold change gene expression on major blood immune cell  
181 abundance changes (see Methods). We observed that monocytes and granulocytes were the major  
182 contributors associated with the dynamic pathways (Supp. Fig. 3c). This further supports the considerable  
183 contribution of monocytes to treatment response, on top of their significant frequency alteration and  
184 their frequency correlation with CRP.

### 185 **‘Disruption Networks’ as a framework to understand individual variation in non-responders’ dynamics.**

186 Whether non-responders’ transcriptional profile reflects fundamental routes of IFX resistance, is essential  
187 for tailoring treatment. To elucidate molecular mechanisms of individual-specific pathways of treatment  
188 non-response, we devised a systematic framework we term ‘Disruption Networks’. The underlying  
189 principle of this method is the study of relations between features across a population of individuals (i.e.,  
190 a population level reference network), and then infer of how these relations differ (i.e., are disrupted) at  
191 the single sample level; providing understanding of how each individual’s molecular network behaves in  
192 a specific condition.

193 To identify how non-responding individuals differ with respect to the IFX response dynamics, we  
194 iteratively added a single non-responding patient to the response reference network we had studied and  
195 calculated the disruption in the correlation structure in each edge for that patient (hereon 'dropout'). This  
196 procedure was performed separately for each non-responder. We considered only negative dropouts,  
197 that is, events in which the relation (i.e., correlation) between two features was weakened once the non-  
198 responder data was spiked into the responders' group, indicating deviance from treatment response (Fig.  
199 3a right, for an example). To evaluate non-responders' dropout significance, we generated empirical null  
200 distribution of dropouts ('normal response' dropouts) by iterative addition of each responder's sample to  
201 the other responders' samples. We calculated P-values as a left-tail percentile, within the null distribution  
202 of the normal dropouts, which were further corrected for multiple testing (Fig. 3a; see Methods). By  
203 applying the 'Disruption Networks' framework, we considerably expanded the detected differential signal  
204 between response groups as compared to standard differential analysis (one feature by Wilcoxon test  
205 ( $FDR < 0.1$ ) vs. 180 features by mean drop intensity, including the single feature identified by Wilcoxon test  
206 ( $FDR < 0.1$  for dropout significance and 10<sup>th</sup> top percentile of mean drop intensity); Fig. 3b and Supp. Fig.  
207 4a-b for mean drop intensity, disrupted edge ratio parameters and the agreement of both respectively).

208 To understand disruption in the functional context, we aggregated the dropouts to calculate a pathway-  
209 level personalized disruption (Fig. 3c; see Methods). We found that the major disrupted dynamics at W2  
210 was related to the cytoskeleton/fiber organization and VEGFR signaling which were central functions  
211 during normal treatment dynamics. Interestingly, nodes related to these disrupted pathways exhibited  
212 high centrality ( $P < 9.999e-05$  and  $P = 0.034$  for degree and betweenness correspondingly by permutation  
213 test; Fig. 3d). On the meta-pathway level, monocytes were the most central cell-type associated with the  
214 disrupted pathways (Fig. 3e, left, top 5<sup>th</sup> percentile for degree and betweenness centrality). The disrupted  
215 meta-pathway included the core genes consisting of the HCK-RAC1-PAK1 signaling cascade, which  
216 presented high combined degree and betweenness centrality ( $P = 0.017$ ,  $n = 1000$  random triple node  
217 subsampling). This core perturbed axis is a final common pathway involving signaling through several  
218 proximal immune-receptors by a range of inflammatory ligands including chemokines, growth factors  
219 such as VEGFR, and FC receptor ligands which induce FC-mediated phagocytosis involving coordinated  
220 process of cytoskeleton rearrangement<sup>14</sup>. Indeed, these pathways were functionally enriched in the  
221 disrupted meta-pathway ( $q\text{-value} < 0.05$ , hypergeometric test; Fig. 3e, right). The latter are also linked to  
222 ROS and NADPH oxidase activation through the regulation of RAC1<sup>15</sup>. Of note, suppression of RAC1-PAK1  
223 signaling, predominately in innate immune cells was shown to mediate remission in CD<sup>16</sup>. Taken together,  
224 these observations showcase the power of 'Disruption Networks' to identify masked, individual level,  
225 signal and suggest that the RAC1-PAK1 signaling cascade, is significantly disrupted in non-responders,  
226 during treatment.

## 227 **RAC1-PAK1 signaling is elevated in responders' peripheral monocytes pre-treatment.**

228 We next asked whether cellular programs found to be disrupted during treatment dynamics can be  
229 identified pre-treatment, since direct differential analysis in the feature expression space did not yield  
230 significant signal. Looking at the feature level, we found that most of the pre-treatment differentially  
231 expressed genes were increased in responders, including genes involved in the RAC1-PAK1 axis ( $FDR < 0.1$ ,  
232 Wilcoxon test, Supp. Fig. 5a). On the pathway level we observed that the fiber organization pathway,  
233 presented pre-treatment disparity between the two response groups ( $FDR < 0.1$ , NPMANOVA) and  
234 correlated with clinical CRP (Spearman's  $r = 0.4$ ,  $P = 0.06$ ), in addition to its high centrality in the response  
235 network (Fig. 4a, left). The relative pathway score of the cytoskeleton-organization pathway was higher  
236 in responders pre-treatment compared to non-responders ( $P < 0.0006$ , one-tailed Wilcoxon test), and was  
237 downregulated following efficient treatment ( $P < 0.001$  and  $P < 0.05$  for W2 and W14 compared to baseline,

238 one-tailed Wilcoxon test). This was in contrast to non-responders which showed insignificant dynamics at  
239 W2 and even an opposite trend in W14 ( $P=0.52$  and  $P=0.041$  for W2 and W14 compared to baseline, one-  
240 tailed Wilcoxon test) (Fig. 4b).

241 The fiber organization pathway associated with treatment dynamics and response already at pre-  
242 treatment state, represents distinctive differences in cellular transcriptional states between response  
243 groups, rather than differences reflecting cellular composition alterations, as our analyses accounted for  
244 cell proportions. Therefore, we next aimed to dissect the cellular origin of the fiber organization related  
245 core genes. First, we tested the correlation between the canonical cellular frequencies as obtained by  
246 CyTOF, and the bulk unadjusted expression of the fiber organization genes (Supp. Fig. 5b). We observed  
247 that the majority of the genes in the target pathway were positively associated with monocytes  
248 abundance. To further validate the cellular origin and the fiber organization related transcriptional cell  
249 state in the two response groups, we performed single-cell RNA sequencing (scRNA-seq) using peripheral  
250 blood mononuclear cells (PBMCs) from pre-treatment samples of representative responder and non-  
251 responder patients (Fig. 4c, left; see Methods). Assessment of the fiber organization related expression in  
252 the cellular level, confirmed that monocytes were highly associated with the distinctive pathway  
253 expression ( $P<2.2e-16$ , for expression in monocytes compared to the other cell types, Wilcoxon test, Fig.  
254 4c, right and Supp. Fig. 6a).

255 To understand the molecular events associated with the fiber organization pathway in the relevant cell  
256 and subset specific context, we expanded the fiber organization differential genes through intersection of  
257 knowledge- and data-driven based networks (see Methods). Then, we assessed the pathway related  
258 expression in monocyte subsets, which were previously shown to exhibit distinct phenotypes and  
259 functions in health, and immune-mediated disease states<sup>17</sup>. The results indicated that intermediate  
260 monocytes contributed most to the fiber organization distinctive expression between the response  
261 groups, pre-treatment ( $|FC|=2.13$ ,  $P<2.2e-16$  in intermediate monocytes vs.  $|FC|=1.3$ ,  $P<2.2e-16$  and  
262  $|FC|=1.1$ ,  $P<0.05$  in classical and non-classical monocytes respectively by Wilcoxon test, Fig. 4d).  
263 Interestingly, we detected significantly increased membrane TNF (mTNF) on intermediate monocytes  
264 compared to the other subsets ( $P<5e-07$ , one-tailed Wilcoxon test, Fig. 4e), suggesting these cells serve  
265 as drug targets, thereby explaining their tight linkage to drug response.

#### 266 **Pre-treatment RAC1-PAK1 axis is predictive for IFX response across immune mediated diseases.**

267 We next tested whether the pre-treatment fiber organization pathway could predict treatment response  
268 (see Methods). We observed that the pathway score of a set of 6 core genes (RAC1, PAK1, LYN, ICAM1,  
269 IL1B and FCGR3A) could discriminate responders from non-responders at a mean AUC of 0.90 (95CI 0.74,  
270 1;  $P=0.0001$  by Permutation test), supporting a common mechanism of non-response to treatment (Fig.  
271 5a). By applying targeted network analysis of the predictive fiber organization pathway in intermediate  
272 monocytes, we found that the FCYR signaling and functionally related pathways including phagocytosis  
273 and ROS metabolism were highly enriched in the co-expression network effectively differentiating  
274 between response groups at baseline (Supp. Fig. 7).

275 To further validate our findings, we tested an additional independent validation cohort of 29 CD patients,  
276 which were naive to biological treatment and were treated with thiopurines or steroids only as a co-  
277 therapy (Supp. Table 9 for clinical demographics). The results indicated that the pre-treatment RAC1-PAK1  
278 axis, was differentially expressed between response groups in the validation cohort ( $P<0.01$ , Wilcoxon

279 test) as well, supporting the primary findings and thereby demonstrating that reduced pre-treatment  
280 expression of the RAC1-PAK1 axis is associated with non-response (AUC=0.78; Fig. 5b).

281 To assess whether the predictive RAC1-PAK1 axis is disease dependent or whether it could be generalized  
282 across diseases, we tested public datasets of blood samples from RA patients, pre-IFX treatment  
283 (GSE20690<sup>18</sup>, GSE33377<sup>19</sup>, GSE42296<sup>20</sup>). Gene expression was adjusted to major cell type contributions  
284 which was evaluated by deconvolution (see Methods). The results confirmed the increased pre-treatment  
285 expression of the axis genes in RA responders, (representative cohort GEO20690, Fig. 5c). Application of  
286 fiber organization predictive signature to multiple pre-treatment RA cohorts separated IFX response  
287 groups effectively (Meta ROC AUC=0.72, Fig. 5d). These findings expand the predictive value of the RAC1-  
288 PAK1 axis to other IFX-treated related diseases such as RA. Taken together, these observations  
289 demonstrate that the baseline RAC1-PAK1 axis expression in monocytes differentiates response groups  
290 and ultimately impacts response potential across diseases.

## 291 Discussion

292 Despite substantial inter-individual heterogeneity and our growing ability to measure it, commonly used  
293 statistical frameworks for analyzing high-dimensional data describe changes happening on average  
294 between conditions or groups. This is especially true in the case of networks which form a natural way of  
295 describing the possible interactions occurring between measured biological species, yet are population-  
296 based, and thus limited in their ability to monitor individual variation from those interactions and the  
297 ensuing emergent phenomena these interactions yield. Here we studied the dynamics of IFX response in  
298 IBD, in a small cohort, over time. To address this challenge, we devised the ‘Disruption Networks’  
299 approach, a cell-centered personalized statistical framework which unmask differences between  
300 individuals. The approach enables a systematic dissection of IFX effect response dynamics from blood,  
301 considering both cellular composition changes and changes in cellular regulatory programs, allowing us  
302 to identify robust functional pathways deviating from normal response in non-responders, and robustly  
303 associate these with drug resistance in both IBD and RA.

304 Although TNF is a pleiotropic cytokine, functioning in both the innate and adaptive immune system<sup>21</sup>, we  
305 found that the early response alterations following IFX treatment were mostly related to innate pathways  
306 of which monocytes were the major driver. Evidence supporting this has been previously implicated by  
307 the decreased frequency of monocytes during treatment in anti-TNF treated IBD<sup>22</sup> and RA<sup>23</sup> patients.  
308 Furthermore, the anti-proliferative and cell-activation suppressive effect of IFX was shown to depend on  
309 FC-expressing monocytes in a mixed lymphocyte reaction<sup>24</sup>. In addition, the regained long term response  
310 following granulocyte/monocyte adsorption treatment following loss of response during IFX treatment  
311 further corroborates our findings<sup>25</sup>. Taken together, these results support the potential for subset specific  
312 targeted therapy to augment IFX treatment.

313 By applying the ‘Disruption Networks’ framework, we identified RAC1-PAK1 signaling, as a central  
314 pathway associated with IFX response. This pathway exhibited disrupted dynamics in non-responders and  
315 was predictive of treatment response at baseline. Although abnormal RAC1 signaling was linked to  
316 immune-mediated diseases pathogenesis<sup>26</sup>, its direct relation to anti-TNF response has not been  
317 demonstrated. The RAC1-PAK1 axis is a final common pathway shared by several proximal immune  
318 receptors, controlling actin cytoskeletal movement, activation of the respiratory burst and phagocytic  
319 activity in innate cells. RAC1 was identified as a susceptibility gene for IBD<sup>27</sup>, and TNF was shown to  
320 stimulate RAC1-GTP loading<sup>16</sup>, supporting efficacy of antagonizing this effect by anti-TNF. In line with our

321 findings demonstrating IFX suppressive effect on the RAC1-PAK1 axis during treatment, thiopurines,  
322 another effective IBD treatment were also shown to inhibit RAC1 activity<sup>28</sup>. The superior effect of anti-  
323 TNF -thiopurines combination over monotherapy<sup>29</sup> suggests that the enhanced therapeutic effect is  
324 mediated not only by controlling anti-drug antibody (ADA) levels, but conceivably also by the induction of  
325 a mutual additive effect on RAC1 suppression. Interestingly, the TREM adaptor (TYROBP/DAP12), which  
326 we previously found to be predictive for anti-TNF response by meta-analysis<sup>9</sup>, was detected in the  
327 differential RAC1-PAK1 signature, exhibiting significant correlation with the RAC1-PAK1 axis in monocytes,  
328 and is also functionally related through shared signaling<sup>30</sup>.

329 The monocytes single-cell based RAC1-PAK1 co-expression network demonstrated pre-treatment  
330 differential expression, primarily in intermediate monocytes, related to FcγR dependent phagocytosis and  
331 interferon signaling. This is consistent with prior reports showing that FcγR affinity affects anti-TNF  
332 therapeutic response<sup>31-33</sup>. Interestingly, RAC1-PAK1 axis was predictive of IFX responsiveness also in RA,  
333 an observation which provides additional validation for the signature predictivity and supports common  
334 baseline elements contributing to response across IFX-treated immune-mediated diseases. Similarly to  
335 IBD, also in RA, the RAC1-PAK1 upstream activator FcγR was linked to disease susceptibility<sup>34,35</sup>. The  
336 FcγR3A is known as a key receptor for monocytes effector response including antibody-dependent cellular  
337 cytotoxicity (ADCC), immune IgG-containing complexes clearance and phagocytosis<sup>36,37</sup>. These further  
338 corroborate the common element of enhanced RAC1-PAK1 signaling through increased expression or  
339 affinity for FcγR3A expressed on monocytes that may enhance the efficacy of IFX in IBD and RA. These  
340 results extend the relevance of molecular commonalities for disease activity<sup>38</sup> and pan-pathology<sup>39</sup>, also  
341 to interconnected pathways of drug responsiveness across diseases.

342 Whether the RAC1-PAK1 axis and the upstream FcγR are applicable to IFX response in other immune-  
343 related diseases or other anti-TNF therapeutic antibodies remains to be determined. While we identified  
344 the RAC1-PAK1 axis as predictive for IFX response in naïve patients, our results do not yet provide an  
345 understanding of how this axis is expressed in non-naïve patients. Considering the backwards immune  
346 shift in non-responders along the ‘health axis’ we identified, analysis of non-naïve patients should be  
347 addressed separately. The ‘health axis’ further provides a potential explanation for the inferior response  
348 rates to subsequent treatments in treatment-experienced compared to naïve patients treated with the  
349 same agents<sup>40</sup>. Of note, our real-life cohorts consisted of clinically comparable responding and non-  
350 responding groups, in terms of demographics and concurrent therapies, except for lower drug levels in  
351 non-responders at W14 in the primary cohort. The disrupted axis was identified at the early W2 response  
352 period in which drug levels were comparable and thus response is not expected to be affected by the  
353 subsequent difference. In this context, the lower drug levels are likely a consequence rather than a cause  
354 of non-response, maybe due to “inflammatory sink” drug consumption, or drug loss through a “leaky  
355 gut”<sup>41,42</sup>.

356 Blood-based pre-treatment biomarkers are highly important for precision medicine, since when identified  
357 across diseases and drugs as performed here, they offer the vision of data-driven choices for physician  
358 treatment and personalized care. Our results suggest that the road to this vision may be shorter than  
359 anticipated, as at least for immuno-therapies, blood is a relevant tissue for signal detection and drug non-  
360 response mechanisms appear to be conserved pan-disease. We note that this pan-disease drug response  
361 conserved pattern may not necessarily hold in biopsies from the site of disease, which being different  
362 tissues, may present different cells playing a role. Our combined experimental-computational approach,  
363 where small time series experiments are combined with an individual-level analytical framework, can be



364 generalized to other diseases and conditions including mechanisms of drug mode of action, drug non-  
365 response, comparison of drug effects and disease courses. These will ultimately allow to make sense of  
366 blood and accelerate an era of immune-based precision diagnostics.

367

## 368 **Methods**

### 369 **Patients and study design**

#### 370 **Primary real-life IBD cohort**

371 A primary real-life cohort consisting of 24 Crohn's disease (CD) patients who received IFX treatment at the  
372 gastroenterology department of the Rambam Health Care Campus (RHCC). All patients met the study  
373 inclusion criteria as follows: 1) Adequately documented active luminal CD, as phenotyped by a  
374 gastroenterologist with expertise in IBD. 2) Documented decision to initiate full IFX induction regimen  
375 with 5 mg/kg induction dosing (i.e., at weeks 0, 2, 6). Patients that had past exposure to Infliximab,  
376 Adalimumab or Vedolizumab, or patients who had active infection including febrile diseases or intra-  
377 abdominal or perianal abscess were excluded. The study was approved by the institutional review board  
378 (0052-17-RMB), and patients provided written informed consent. Demographic and clinical characteristics  
379 of the patients are shown in Supp. table 1.

380 Patient samples were obtained at three time points: at baseline, before IFX treatment, and two and  
381 fourteen weeks post first treatment and assayed for gene expression microarray data, high-resolution  
382 granulocytes and lymphocytes subtype frequencies and functional markers by CyTOF, and a panel of 51  
383 cytokines and chemokines by Luminex. CyTOF panel including Clone, vendor, and conjugation  
384 information, and Luminex panel are detailed in Supp. table 2 and 3 respectively.

385 Patient response classification was defined by decision algorithm, which we used and described previously  
386 <sup>9</sup>. Briefly, patients were classified as responders based on clinical remission, which was defined as  
387 cessation of diarrhea and abdominal cramping or, in the cases of patients with fistulas, cessation of fistula  
388 drainage and complete closure of all draining fistulas at W14, coupled with a decision of the treating  
389 physician to continue IFX therapy at the current dosing and schedule. In patients that were initially  
390 clinically defined as partial responders, classification was determined by a decision algorithm that  
391 included the following hierarchical rules: 1) steroid dependency at week fourteen; 2) biomarker dynamics  
392 (calprotectin and CRP) and 3) response according to clinical state at week 26. Applying the decision  
393 algorithm and exclusion criteria, yielded a final study cohort of 15 and 9 responding and non-responding  
394 patients respectively.

395 As shown in Supp. table 1, responders significantly reduced CRP, already at W2 post first treatment while  
396 non-responders presented a trend of reduced CRP at W2, but their CRP level following 14 weeks was  
397 elevated and significantly higher than CRP level in responders. No significant difference was found in  
398 target TNF $\alpha$  levels, neither in responders or non-responders, as measured by either serum cytokine level  
399 using Luminex or by adjusted gene expression. As expected, IFX drug levels were shown to be significantly  
400 reduced, in both responders and non-responders at W14 compared to W2, due to the transition from  
401 induction to maintenance therapy. Drug levels of responders were significantly higher compared to non-  
402 responders at W14. However, at W2, no significant difference in drug levels was measured. Responders



403 also showed improved albumin levels along treatment, with significantly higher levels compared to non-  
404 responders at W14. All other parameters were comparable between the two response groups.

#### 405 **Validation real life IBD cohort**

406 The validation cohort consisted of 29 CD patients from the RHCC, which were classified to 20 and 9 clinical  
407 responding and non-responding respectively patients according to the above-described decision  
408 algorithm (Supp. table 9).

#### 409 **CyTOF sample processing and analysis**

410 A total of  $2 \times 10^6$  cells of each sample were stained (1 h; room temperature) with a mixture of metal-  
411 tagged antibodies (complete list of antibodies and their catalog numbers is provided in Supp. table 2). This  
412 mix contained antibodies against phenotyping markers of the main immune populations and some central  
413 cytokine and chemokine receptors. All antibodies were validated by the manufacturers for flow  
414 application (as indicated on the manufacturer's datasheet, available online) and were conjugated by using  
415 the MAXPAR reagent (Fluidigm Inc.). Iridium intercalators were used to identify live and dead cells. The  
416 cells were fixed in 1.6% formaldehyde (Sigma-Aldrich) at 4°C until they were subjected to CyTOF mass  
417 cytometry analysis on a CyTOF I machine (Fluidigm Inc.). Cell events were acquired at approximately 500  
418 events/s. To overcome potential differences in machine sensitivity and a decline of marker intensity over  
419 time, we spiked each sample with internal metal-isotope bead standards for sample normalization by  
420 CyTOF software (Fluidigm Inc.) as previously described<sup>43</sup>.

421 For data preprocessing, the acquired data were uploaded to the Cytobank web server (Cytobank Inc.) to  
422 exclude dead cells and bead standards. The processed data were analyzed using Citrus algorithm, which  
423 performs hierarchical clustering of single cell-events by a set of cell-type defining markers and then assigns  
424 per sample, per cluster its relative abundance in each sample as well as the median marker expression for  
425 each functional marker per cluster<sup>44</sup>. Citrus analysis was applied separately on PBMCs and Granulocytes  
426 population in each sample using the following parameters: minimum cluster size percentage of 0.01 and  
427 0.02 for PBMCs and Granulocytes respectively, subsampling of 15,000 events per sample and arcsin  
428 hyperbolic transform cofactor of 5. The gating for the classification of the clusters is detailed in Supp. table  
429 3.

#### 430 **Blood transcriptome analysis**

431 Whole blood was maintained in PAXgene Blood RNA tubes (PreAnalytiX). RNA was extracted and assayed  
432 using Affymetrix Clariom S chips (Thermo Fisher Scientific). The microarray data are available at the Gene  
433 Expression Omnibus database (<http://www.ncbi.nlm.nih.gov/geo/>). The raw gene array data were  
434 processed to obtain a log<sub>2</sub> expression value for each gene probe set using the RMA (robust multichip  
435 average) method available in the affy R package. Probe set annotation was performed using affycoretools  
436 and clariomshumantranscriptcluster.db packages in R. Data were further adjusted for batch effect using  
437 empirical Bayes framework applied by the Combat R package.

438 Gene expression data were further adjusted for variations in frequency of major cell types across samples  
439 as measured by CyTOF, including CD4+ T cells, CD8+ T cells, CD19+ B cells, NK cells, monocytes and  
440 granulocytes, to allow detection of differential biological signals that do not stem from cell proportion

441 differences, which might be otherwise masked in unadjusted gene expression data. Adjustment was  
442 performed using the CellMix R package.

#### 443 **Cytokines and chemokines measurement using Luminex bead-based multiplex assay**

444 Serum was separated from whole blood specimens and stored at -80°C until used for cytokine  
445 determination. Samples were assayed in duplicate according to the manufacturers' specifications  
446 (ProcartaPlex™ Immunoassay, EPX450-12171-901, eBioscience, Cytokine/Chemokine/Growth Factor 45-  
447 Plex Human Panel 1, Supp. table 4).

448 Data were collected on a Luminex 200 instrument and analyzed using Analyst 5.1 software (Millipore) and  
449 NFI (Median Fluorescence Intensity) values were used for further data processing. A pre-filtering was  
450 applied as follows: samples with low mean bead count, below 50 were excluded from analysis. In addition,  
451 duplicates with high CV values (Coefficient of variation) above 40% were omitted. NFI values with low  
452 bead count, below 20 were filtered out, but in cases which one replicate had acceptable bead count and  
453 the CV values for both replicates were less than 25%, NFI values were retained.

454 Finally, net MFI values were calculated by blank reduction followed by log2 transformation. Data were  
455 further adjusted for batch effect using the empirical Bayes framework applied by the Combat R package.

#### 456 **Characterization of IFX responders and non-responders' dynamics through integrative molecular 457 response axis combining external and in-house data**

458 An integrative molecular response axis was constructed to recapitulate the complex nature of anti-TNF $\alpha$   
459 response progression dynamics which enables to track individual immune dynamics of both responding  
460 and non-responding patients. This methodology was assessed using an external data-based axis.

461 For unbiased definition of the 'Health axis' and validation of our own data we used public gene expression  
462 data of whole blood from 25 UC patients and 50 CD patients in active or inactive disease states, available  
463 in Gene Expression Omnibus (GSE94648). The patients in this external cohort were treated with different  
464 medications including 5-ASAs, Immunosuppressants, anti-TNF agents, steroids and combinations of these  
465 therapies, as previously described<sup>45</sup>, representative of a relatively large portion of the treated IBD patient  
466 population. The analysis was performed in several steps: (1) Differential expression analysis between  
467 active disease and healthy states for UC and CD separately (Supp. Table 5), using the limma R package,  
468 followed by PCA (Principal Component Analysis). (2) Ordinal lasso was used to select the principal  
469 components that best describe the desired directionality from active through inactive to healthy state,  
470 based on optimal absolute coefficient values and percentage of variance explained parameters (Supp.  
471 Table 6). (3) The 'Health axis' coordinates were defined based on initial and terminal points determined  
472 as the mean of the two end-point coordinates of active and healthy states. (4) Applying vector  
473 multiplication (dot product) for the calculation of the projection of sample vector from our in-house  
474 cohort in the direction of the external 'health axis', to estimate sample position on the axis. (5) Evaluation  
475 of the distance of patient samples between two time points based on sample axis location.

476

477

## 478 **Multi-omics network of anti-TNF blood response dynamics**

### 479 **Core co-expression response network**

480 To identify features that change over time in responders, a linear mixed-effects model was used, in which  
481 time was treated as a fixed effect and individuals were treated as a random effect (lmer R package) to  
482 allow testing differential expression by time while accounting for between-subject variations. P-values  
483 were calculated empirically through a permutation test ( $n_{perm}=1000$ ). In each permutation, feature  
484 measurements were shuffled between visits for each responding patient. Permutation based p-values  
485 were obtained by comparing the absolute value of the non-permuted  $\beta$  coefficient for each feature to the  
486 null distribution of permuted  $\beta$  coefficients for the same feature. In order to calculate FDR based on the  
487 permutation results, permuted p-value was determined for each permuted  $\beta$  coefficient, by comparing  
488 the tested permuted  $\beta$  coefficient to the distribution of the other permuted  $\beta$  coefficients for each feature.  
489 Then FDR was estimated by comparing the non-permuted p-values to the null distribution of the  
490 permuted *p-values*. A similar calculation was performed for non-responders ( $\max n_{perm}=512$ ).

491 In addition to the determination of dynamic features in the full responders' sample data, a random  
492 subsampling of samples from the responders group, without replacement, was applied to achieve equal  
493 sample size between responders and non-responders. Two-hundred subsamples were generated and  
494 tested using linear mixed-effects models. In this part, for the comparison of equally sized responders and  
495 non-responders' groups, p-values were calculated based on the t-statistic using the Satterthwaite  
496 approximation, implemented in the lmerTest R package, followed by multiple hypotheses correction  
497 using the Benjamini-Hochberg procedure.

498 Co-expression network based on V1-V2 fold-change expression values of the significantly altered features  
499 (FDR<0.15) was constructed, based on pairwise Spearman's rank correlation using the psych R package.  
500 Filtering was applied to remove feature-pairs with insignificant correlation with a cutoff of FDR<0.1.

### 501 **Network propagation**

502 Network propagation procedure was applied to enhance the biological signal of the obtained networks as  
503 previously described<sup>46</sup> with slight modifications. Briefly, for each node in the network, protein interactors  
504 with a combined score above 700 were extracted based on STRING database (functional protein  
505 association networks; <https://string-db.org/cgi/download.pl>) using STRINGdb R package. A node  
506 interactor was added as a linker gene to the network if its own interactors (hubs) were significantly  
507 enriched in the core network features. Enrichment was calculated using the hypergeometric test in the  
508 stats R package. Calculated p-values were adjusted for multiple hypotheses using the Benjamini-Hochberg  
509 procedure. A cutoff of FDR<0.05 was selected for significant enrichment of the tested interactor hubs in  
510 the immune network.

### 511 **Functional enrichment assessment for the response network**

512 To assess dynamics in the functional level, genes were grouped to functional sets by using a semi-  
513 supervised approach combining both network structure and known gene set annotations from Hallmark,  
514 Kegg, Reactome, Biocarta, PID and BP Go terms. Each edge in the network was classified to a specific  
515 pathway if its two linked nodes were annotated in the same biological group. Pathways with less than 5  
516 mapped edges were filtered out. This was followed by a global gene set enrichment analysis using fGSEA  
517 (FDR<0.15,  $n_{perm}=1000$ ,  $minSize=10$ ,  $maxSize=400$ ).

518 The dynamic enriched pathway structures were further tested for significance by comparing the density  
519 (graph density score) of each pathway associated sub-network to a parallel sub-network density obtained

520 from 100 random networks with a matched size according to the Erdos-Renyi model which assigns equal  
521 probability to all graphs with identical edge count (igraph R package). P-value was evaluated as the  
522 proportion of random module density scores that were higher than the real module density score.  
523 Additional filtering was applied according to the number of connected components in a pathway sub-  
524 graph (igraph R package). Only highly connected pathways (percentage of largest connected  
525 component > 50%, size of the connected component > 10) were included.

526 The dynamic pathways list was further condensed by filtering out high overlapping pathways using Jaccard  
527 index. Accordingly, in overlapping pathways pairs that presented a Jaccard index above 0.5 the smaller  
528 module was omitted.

529 To further associate the assigned pathways with treatment response, the Wilcoxon test was used to  
530 compare V1 to V2 and V1 to V3 relative pathway scores in responders and non-responders. p-values were  
531 adjusted for multiple hypotheses using the Benjamini-Hochberg procedure (FDR < 0.05). Relative pathway  
532 scores were calculated for each sample as previously described<sup>38,47</sup> (see Relative pathway score  
533 evaluation). To assess cellular contributions for each pathway, the non-adjusted expression of each gene  
534 in the dynamic pathways was regressed over the major peripheral cell type frequencies as determined by  
535 CyTOF including granulocytes, CD4 and CD8 T cells, B cells, NK cells and monocytes. The cell-specific  
536 contribution to each pathway was determined as the mean of the coefficients of the tested cell type across  
537 all genes in the module. The centrality of each pathway in the response network was also evaluated by  
538 calculating the pathway based mean betweenness and degree across all gene members of the pathway  
539 (igraph R package). To further assess the clinical relevance of the dynamic pathways to the treatment  
540 response, the calculated pathway score at all tested time points was correlated with CRP using Spearman's  
541 rank correlation test.

#### 542 **Relative pathway score evaluation**

543 The expression of each gene in the pathway was standardized by the z-score transformation, to enable  
544 comparable contribution of each gene member to the pathway score, followed by mean value calculation  
545 across the transformed genes in the pathway for each sample.

#### 546 **'Disruption Networks' framework**

547 To understand individual variation in non-response dynamics, we developed an approach termed  
548 'Disruption Networks' in which individual non-responders are iteratively added to the obtained normal  
549 IFX response network, and the disruption in the correlation structures is assessed for each edge in the  
550 reference response network. The disruption is evaluated in the node (gene/cell) or the module level to  
551 determine biological mechanisms that may explain patterns of the non-response.

552 More specifically, consider a feature matrix  $F_{n \times m}$  where  $n$  is the number of samples for a given condition,  
553 in our case,  $n$  is the number of samples of responding patients and  $m$  is the number of features, where  
554  $f(i,j)$  refers to a fold change measured value at a given time point relative to baseline, of the  $j$ -th feature  
555 in the  $i$ -th sample. Let matrix  $R_{m \times m}$  be the feature pairwise Spearman's rank correlation matrix based on  
556  $F$  which represents the global response network, where  $r(j,k) = \text{cor}(j,k)$  for genes  $j$  and  $k$ . Insignificant  
557 correlation values according to FDR thresholds, as described above, were presented as NAs in the matrix.

558 The 'Disruption Networks' construction was assessed individually for each non-responder as follows: a  
559 new  $F'_{(n+1) \times m}$  matrix was generated by the addition of the tested non-responder to the responders'  
560 samples. Based on  $F'$ , a new pairwise Spearman's rank correlation matrix was calculated to obtain  $R'_{m \times m}$ ,

561 in which  $r'(j,k)$  is the correlation between  $j$  and  $k$  genes when including the non-responder in the  
562 responders' samples.

563 For correlation coefficients comparison, correlation coefficient values were transformed using Fisher z-  
564 transformation by the following formula:

565  $z(r) = 0.5 * \ln\left(\frac{1+r}{1-r}\right)$  and a standard error of  $SEz(r) = \frac{1}{\sqrt{n-3}}$  where  $n$  is the number of samples.

566 We define a 'disruption' term as the drop in the Fisher z transformed values between two genes as a result  
567 of the non-responder addition using the statistical z score which is defined as:

568 
$$disruption(j, k) = z\ score = \frac{z(r') - Z(r)}{Pooled.SEz} = \frac{z(r') - Z(r)}{\sqrt{\frac{1}{(n+1)-3} + \frac{1}{n-3}}}$$

569 Only negative values of  $sign(r * (z(r') - Z(r)))$ , which indicate weakening of the original  
570 correlation obtained in responders were included, while positive values were set to zeros. Drop degree of  
571 confidence for non-responders was assessed empirically for each drop value in each edge, based on the  
572 non-responder drop value percentile in the responders' normal drop distribution. This was further  
573 corrected for multiple testing using the Benjamini-Hochberg procedure. Edges with drop adjusted  
574 percentile <0.1 were considered as significantly disrupted. Insignificant drop values were set to zeros.  
575 Analysis of disruption parameters in the feature level, revealed a considerably expansion of the detected  
576 differential signal between response groups, compared to standard differential analysis by Wilcoxon test.  
577 While using the Wilcoxon test we detected only one feature (0.06%), with significant differential dynamics  
578 between response groups at W2, we identified this feature together with 179 additional features (10%)  
579 when using disruption parameter of top mean drop intensity (FDR<0.1 by Wilcoxon test, FDR<0.1 for  
580 significant dropout and top 0.1 percentile of mean drop intensity, Figure 3b). We observed similar results  
581 for the disrupted edge ratio (0.06% Vs. 14.4% significant features identified by Wilcoxon test (FDR<0.1)  
582 and top disrupted edge ratio parameter (FDR<0.1 for significant dropout and top 0.1th percentile of node  
583 disrupted edges) respectively, Supp. figure 4a). Testing the agreement of both disruption parameters, we  
584 identified 9.4% dynamics differential features including the single feature identified by Wilcoxon test  
585 (Supp. figure 4b).

586 Disruption was also measured in the pathway level for each individual using three different  
587 measurements: (1) Pathway specific mean drop intensity in which a mean drop intensity was calculated  
588 across the relevant edges in the module, for a specific individual. (2) Pathway specific percentage of  
589 disrupted edges which determines the percentage of edges in the pathway that the specific individual is  
590 significantly disrupted in. (3) Pathway specific percentage of disrupted nodes which evaluate the  
591 percentage of disrupted nodes for a specific individual out of all module nodes.

592 For binary classification of disrupted pathways, we quantify the disruption measure across a range of  
593 percentile values in each parameter. For each parameter, in each percentile, the selected positive  
594 disrupted modules were those that were disrupted in at least 50% of the non-responding patients and in  
595 less than 20% of the responders, or in cases where the difference between the percentage of disrupted  
596 non-responders to responders is higher than 50%. The top significantly positive disrupted modules were  
597 defined as those with a complete agreement of all three parameters in the highest percentile with shared  
598 selected pathways across all parameters, which in our case was determined as the 0.8 percentile.

## 599 **Single cell RNA sequencing**

### 600 **Peripheral blood mononuclear cells (PBMCs) cryopreservation and thawing**

601 Blood samples were drawn before IFX first infusion. PBMCs were isolated using density gradient  
602 centrifugation by spinning blood over UNI-SEPmaxi+ tubes (Novamed Ltd.) following the manufacturer's  
603 protocol. Isolated cells were resuspended in 1 ml freezing solution, containing 10% DMSO and 90% FCS.  
604 The samples were kept in Nalgene Mr. Frost® Cryo 1°C Freezing Container (ThermoFisher scientific) with  
605 Isopropyl alcohol at -80°C over-night, and immediately after placed in a liquid nitrogen container for long-  
606 term storage.

607 For thawing, frozen PBMCs were immediately transferred to a water bath at 37°C for 2-3 min, until a  
608 tiny ice crystal was remained. Thawed cells were transferred into 50 mL centrifuge tubes and rinsed with  
609 1 mL of warm (37 °C) RPMI 1640 supplemented with 10% of FCS which was added dropwise to the  
610 DMSO containing fraction while gently shaking the cells. Next, the cells were sequentially diluted by first  
611 adding 2 mL of medium followed by another 4, 8 and 16 mL respectively with 1 min wait between the  
612 four dilution steps. The diluted cell suspension was centrifuged for 5 min at 300 g. Most of the  
613 supernatant was discarded leaving ~1 ml, and the cells were resuspended in 9 ml of medium followed by  
614 additional centrifugation for 5 min at 300 g and resuspended with the same media to reach the desired  
615 cell concentration.

### 616 **Single cell RNA sequencing in 10X genomics platform**

617 PBMCs from responder and non-responder patients pre-treatment (N=2) were prepared for scRNA-seq  
618 according to the 10x Genomics Single Cell protocols for fresh frozen human peripheral blood mononuclear  
619 cells (see above for cell preservation and thawing). The cells were adjusted to a final cell concentration of  
620 1000 cells/µl and placed on ice until loading into the 10x Genomics Chromium system. The scRNA  
621 sequencing was performed in the genomic center of the biomedical core facility in the Rappaport faculty  
622 of medicine at the Technion - Israel Institute of Technology. Libraries were prepared using 10x Genomics  
623 Library Kits (Chromium Next GEM Single Cell 3' Library & Gel Bead Kit v3.1, PN-1000121) using 20,000  
624 input cells per sample. Single cell separation was performed using the Chromium Next GEM Chip G Single  
625 Cell Kit (PN-1000120). The RNAseq data was generated on Illumina NextSeq500, high-output mode  
626 (Illumina, FC-404-2005), 75 bp paired-end reads (Read1- 28 bp, Read2- 56 bp, Index- 8 bp).

### 627 **Single cell data analysis**

628 Cell Ranger single cell software suite was used for sample de-multiplexing, alignment to human reference  
629 genome (GRCh38-3.0.0), cell barcode processing and single cell UMI counting following default settings.  
630 The UMI count matrix was further processed using the Seurat R package (version 3.1.4). First, as a QC  
631 step, cells that had a unique feature count of less than 200 were filtered out. Additional filtering was  
632 applied to remove features detected in less than 3 cells. we further filtered cells based on mitochondrial  
633 gene content above 0.25%. After this step, 19275 single cells and 20673 genes in total were retained and  
634 included in downstream analyses. This was followed by Global-scaling library size normalization. Genes  
635 were scaled in comparison to all other cells and regressed out the effects of unwanted sources of variation  
636 including UMI counts and percentage of mitochondrial genes for the remaining cells. At the next step, we  
637 performed linear dimensionality reduction on the scaled data of the top 2000 highly variable genes.  
638 Resampling test based on the jackstraw procedure and Elbow plot were performed to identify the first 30  
639 significance principal components that were used for downstream visualization by t-SNE plot.



640 SingleR was used to annotate cell types based on correlation profiles with two different resolutions of  
641 cell classification using the Blueprint-Encode<sup>48</sup> and the Monaco Immune Cell<sup>49</sup> reference datasets of pure  
642 cell types. Differential expression analysis between responders and non-responders was performed for  
643 each cell population using a Wilcoxon Rank Sum test implemented in the FindAllMarkers function in the  
644 Seurat package.

645 Relative pathway score based on the expanded fiber-organization baseline differential genes was  
646 calculated for each single cell and compared between cell subsets and response groups using Wilcoxon  
647 test (for the expanded fiber organization differential genes assessment see below description for selection  
648 and evaluation of predictive model for IFX treatment response; see the above description for relative  
649 pathway score calculation).

650 To identify cell specific enriched pathways that are associated with the predictive fiber-organization  
651 related signature, we constructed a co-expression network based on the pre-treatment expression of the  
652 predictive genes: RAC1, PAK1, ICAM1, LYN, FCGR3A and IL-1 $\beta$ , in intermediate monocyte subset in each  
653 response group using the MTGOsc R package (Spearman's correlation, thinning net by 0.1 top percentile).  
654 Functional enrichment analysis was performed based on the co-expressed network nodes, by a  
655 hypergeometric test based on the Reactome database using the Clusterprofiler R package (P-adjust<0.05).  
656 Wilcoxon test was assessed to identify significant differences in pathway scores between response groups  
657 for each enriched pathway in each monocyte subset. P-values were further adjusted for multiple testing  
658 using the Benjamini-Hochberg procedure.

#### 659 **Predictive model for IFX treatment response**

660 Given the significant linkage between monocytes and the differential fiber organization pathway, in order  
661 to build a cell specific pre-treatment classifier, we expanded the fiber organization adjusted-bulk based  
662 differential genes through intersection of knowledge based- (combined score>900,  
663 9606.protein.links.detailed.v11.0 from the STRING protein interaction database: <http://string-db.org/> and  
664 data-driven networks (Monocytes single-cell based co-expression from a representative responder and  
665 non-responder patients at baseline, Spearman's r, thinning percentile: 0.05, MTGOsc R package). This  
666 yielded a combined network of 42 edges containing 23 nodes. To build a predictive signature, we used  
667 elastic net regularized logistic regression for predictors selection, which has the advantage of including all  
668 correlated predictors sharing transcriptional signal (grouping effect), rather than selecting one variable  
669 from a group of correlated predictors while ignoring the others<sup>50</sup>. We used the glmnet R package  
670 implemented within the caret R package for model fitting by tuning over both alpha (ranging from 0.5-1,  
671 n=6) and lambda (ranging from 0.0001-1, n=20) parameters with 100 repeated 2-fold cross-validation.  
672 The optimized model was chosen based on the best performance value using the Receiver operating  
673 characteristic (ROC) metric (alpha=0.5, lambda=0.26).

674 After variable selection, we calculated AUC based on relative pathway score combining the selected genes  
675 using the pROC R package.

676 Internal validation was performed by bootstrapping (n=1000 bootstrap samples) for the AUC by randomly  
677 drawing subjects with the same sample size from the original cohort (with replacement).

678 A permutation test was used for estimating one-tailed P-value (n=10000 permutations) by shuffling the  
679 subject labels between the response groups and the expression of the selected signature genes. Then we  
680 tested the null hypothesis that the observed AUC was drawn from this null distribution.

681

## 682 **External validation of the predictive signature using additional independent real-life IBD cohort**

683 For independent validation of the predictive signature, we used an independent IBD cohort of 29 patients  
684 (see Patient in the validation real life cohort). RNA was then extracted using RNeasy mini kit (QIAGEN)  
685 according to the manufacturer's instruction (for preservation and thawing of PBMCs see Peripheral blood  
686 mononuclear cells (PBMCs) cryopreservation). Complementary DNA was synthesized using Maxima first  
687 strand cDNA synthesis kit with dsDNase (Thermo Scientific). qPCR was performed using 7300 Real-Time  
688 PCR System (AB Applied Biosystems). Relative cytokine expression was calculated following normalization  
689 to glyceraldehyde-3 phosphate dehydrogenase (GAPDH) expression (Supp. table 10 for the PCR primer  
690 sets). Primers were purchased from Sigma Aldrich. The expression of the genes in the predictive signature  
691 was calculated relative to CD14 expression, to measure monocytes' centered differential expression  
692 between response groups pre-treatment. Relative pathway score was used to assess prediction  
693 performance (see Relative pathway score evaluation).

## 694 **Assessment of the predictive signature performance in RA**

695 The prediction performance of the RAC1-PAK1 signature in RA public expression datasets was evaluated  
696 using the following datasets: GSE20690 (n=68 of which 43 and 25 are responders and non-responders  
697 respectively), GSE33377 (n=42 of which 18 and 24 are responders and non-responders respectively) and  
698 GSE42296 (n=19 of which 13 and 6 are responders and non-responders respectively).  
699 Gene expression was adjusted to major cell type contributions (see Blood transcriptome analysis), which  
700 were evaluated by deconvolution using a linear regression framework in which individual samples were  
701 regressed based on a characteristic expression of marker genes expressed in 17 cell-types (CellMix R  
702 package). This was followed by performance prediction calculation for each study based on the relative  
703 signature score based on the adjusted gene expression. Due to differences in expression platforms  
704 between studies, there were genes in the signature which were not present in a specific dataset, therefore  
705 those genes were not used in the calculation of the relative signature score for the prediction of the  
706 specific study. To combine prediction performance from these independent studies we constructed a  
707 summary ROC curve (meta-ROC) using the nsROC R package which performs a simple linear interpolation  
708 between pairs of points of each individual ROC.  
709

710 **Acknowledgments**

711 This work was supported by funding of the Helmsley Charitable Trust to Y.C and S.S.S-O. We thank  
712 T.Shvedov for contribution to patient enrollment and clinical data collection. S.Pollok, L.Pinzur,  
713 N.Molshatzki and Y.Benita for fruitful discussions and advice on the computational methodology.

714 **Author contributions**

715 S.S.S.-O, Y.C. conceived the idea; S.S.S-O, Y.C, S.G.V, E.S and R.G designed the analyses, S.S.S-O, Y.C. and  
716 S.G.V performed the interpretation; S.G.V and R.G performed the design and development of the  
717 computational pipeline and validation; A.K, B.P, Y.G and A.A performed development of the  
718 computational methodology; N.Ma, A.B, S.P and E.S counseled regarding the biological interpretation; E.S  
719 performed the experimental design of the collected cohort and E.S, N.Ma, A.A and T.D performed the  
720 data generation; A.B and N.Mi performed the experimental validation; A.B, S.P performed the sample  
721 collection; Y.C, H.B.Y and Y.G performed patient enrollment and clinical characterization; S.S.S-O, Y.C and  
722 S.G.V wrote the manuscript.

723 **Competing interests**

724 These authors disclose the following: Y.C received consulting fees from AbbVie, Janssen, Takeda, Pfizer  
725 and CytoReason; speaker fees from AbbVie, Janssen, and Takeda; and grants from AbbVie, Takeda and  
726 Janssen. S.S.S-O received grant fees from Takeda, S.S.S.-O, E.S. and R.G declares CytoReason equity and  
727 advisory fees. N. Ma and A.K are employees at CytoReason. S.G.V declares CytoReason advisory fees. The  
728 remaining authors disclose no conflicts.

729

## 730 References

731

- 732 1. Jiang, P. *et al.* Signatures of T cell dysfunction and exclusion predict cancer immunotherapy  
733 response. *Nat. Med.* (2018). doi:10.1038/s41591-018-0136-1
- 734 2. Murthy, S. K. *et al.* Introduction of anti-TNF therapy has not yielded expected declines in  
735 hospitalisation and intestinal resection rates in inflammatory bowel diseases: A population-based  
736 interrupted time series study. *Gut* (2020). doi:10.1136/gutjnl-2019-318440
- 737 3. Berns, M. & Hommes, D. W. Anti-TNF- $\alpha$  therapies for the treatment of Crohn's disease: the past,  
738 present and future. *Expert Opin. Investig. Drugs* (2015). doi:10.1517/13543784.2016.1126247
- 739 4. Mitoma, H., Horiuchi, T., Tsukamoto, H. & Ueda, N. Molecular mechanisms of action of anti-TNF-  
740  $\alpha$  agents – Comparison among therapeutic TNF- $\alpha$  antagonists. *Cytokine* (2018).  
741 doi:10.1016/j.cyto.2016.08.014
- 742 5. Roda, G., Jharap, B., Neeraj, N. & Colombel, J. F. Loss of Response to Anti-TNFs: Definition,  
743 Epidemiology, and Management. *Clinical and Translational Gastroenterology* (2016).  
744 doi:10.1038/ctg.2015.63
- 745 6. Seymour, H. E., Worsley, A., Smith, J. M. & Thomas, S. H. L. Anti-TNF agents for rheumatoid  
746 arthritis. *Br. J. Clin. Pharmacol.* (2001). doi:10.1046/j.1365-2125.2001.00321.x
- 747 7. Digby-Bell, J. L., Atreya, R., Monteleone, G. & Powell, N. Interrogating host immunity to predict  
748 treatment response in inflammatory bowel disease. *Nature Reviews Gastroenterology and*  
749 *Hepatology* (2020). doi:10.1038/s41575-019-0228-5
- 750 8. West, N. R. *et al.* Oncostatin M drives intestinal inflammation and predicts response to tumor  
751 necrosis factor–neutralizing therapy in patients with inflammatory bowel disease. *Nat. Med.* **23**,  
752 579–589 (2017).
- 753 9. Gaujoux, R. *et al.* Cell-centred meta-Analysis reveals baseline predictors of anti-TNF $\alpha$  non-  
754 response in biopsy and blood of patients with IBD. *Gut* **68**, 604–614 (2019).
- 755 10. Mulhearn, B., Barton, A. & Viatte, S. Using the immunophenotype to predict response to biologic  
756 drugs in rheumatoid arthritis. *Journal of Personalized Medicine* (2019). doi:10.3390/jpm9040046
- 757 11. Kuijjer, M. L., Tung, M. G., Yuan, G. C., Quackenbush, J. & Glass, K. Estimating Sample-Specific  
758 Regulatory Networks. *iScience* (2019). doi:10.1016/j.isci.2019.03.021
- 759 12. Liu, X., Wang, Y., Ji, H., Aihara, K. & Chen, L. Personalized characterization of diseases using  
760 sample-specific networks. *Nucleic Acids Res.* (2016). doi:10.1093/nar/gkw772
- 761 13. Liu, Y. *et al.* Cytokine-mediated regulation of activating and inhibitory Fc $\gamma$  receptors in human  
762 monocytes. *J. Leukoc. Biol.* (2005). doi:10.1189/jlb.0904532
- 763 14. Turner, M. & Billadeau, D. D. VAV proteins as signal integrators for multi-subunit immune-  
764 recognition receptors. *Nature Reviews Immunology* (2002). doi:10.1038/nri840
- 765 15. Zhao, X., Carnevale, K. A. & Cathcart, M. K. Human Monocytes Use Rac1, Not Rac2, in the NADPH  
766 Oxidase Complex. *J. Biol. Chem.* (2003). doi:10.1074/jbc.M302208200
- 767 16. Parikh, K. *et al.* Suppression of p21Rac signaling and increased innate immunity mediate  
768 remission in Crohn's disease. *Sci. Transl. Med.* (2014). doi:10.1126/scitranslmed.3006763
- 769 17. Kapellos, T. S. *et al.* Human monocyte subsets and phenotypes in major chronic inflammatory  
770 diseases. *Frontiers in Immunology* (2019). doi:10.3389/fimmu.2019.02035
- 771 18. Tanino, M. *et al.* Prediction of efficacy of anti-TNF biologic agent, infliximab, for rheumatoid  
772 arthritis patients using a comprehensive transcriptome analysis of white blood cells. *Biochem.*  
773 *Biophys. Res. Commun.* (2009). doi:10.1016/j.bbrc.2009.06.149
- 774 19. Toonen, E. J. M. *et al.* Validation study of existing gene expression signatures for anti-TNF  
775 treatment in patients with rheumatoid arthritis. *PLoS One* (2012).  
776 doi:10.1371/journal.pone.0033199
- 777 20. Mesko, B. *et al.* Peripheral blood derived gene panels predict response to infliximab in  
778 rheumatoid arthritis and Crohn's disease. *Genome Med.* (2013). doi:10.1186/gm463
- 779 21. Kalliolias, G. D. & Ivashkiv, L. B. TNF biology, pathogenic mechanisms and emerging therapeutic  
780 strategies. *Nat. Rev. Rheumatol.* (2016). doi:10.1038/nrrheum.2015.169

- 781 22. Lügering, A. *et al.* Infliximab induces apoptosis in monocytes from patients with chronic active  
782 Crohn's disease by using a caspase-dependent pathway. *Gastroenterology* (2001).  
783 doi:10.1053/gast.2001.28702
- 784 23. Batko, B., Schramm-Luc, A., Skiba, D. S., Mikolajczyk, T. P. & Siedlinski, M. TNF- $\alpha$  inhibitors  
785 decrease classical CD14 hi cd16- monocyte subsets in highly active, conventional treatment  
786 refractory rheumatoid arthritis and ankylosing spondylitis. *Int. J. Mol. Sci.* (2019).  
787 doi:10.3390/ijms20020291
- 788 24. Rossol, M. *et al.* Interaction between Transmembrane TNF and TNFR1/2 Mediates the Activation  
789 of Monocytes by Contact with T Cells. *J. Immunol.* (2007). doi:10.4049/jimmunol.179.6.4239
- 790 25. Yokoyama, Y. *et al.* Efficacy of granulocyte and monocyte adsorptive apheresis in patients with  
791 inflammatory bowel disease showing lost response to infliximab. *J. Crohn's Colitis* (2020).  
792 doi:10.1093/ecco-jcc/jjaa051
- 793 26. Marei, H. & Malliri, A. Rac1 in human diseases: The therapeutic potential of targeting Rac1  
794 signaling regulatory mechanisms. *Small GTPases* (2017). doi:10.1080/21541248.2016.1211398
- 795 27. Muise, A. M. *et al.* Single nucleotide polymorphisms that increase expression of the guanosine  
796 triphosphatase RAC1 are associated with ulcerative colitis. *Gastroenterology* (2011).  
797 doi:10.1053/j.gastro.2011.04.057
- 798 28. Tiede, I. *et al.* CD28-dependent Rac1 activation is the molecular target of azathioprine in primary  
799 human CD4+ T lymphocytes. *J. Clin. Invest.* (2003). doi:10.1172/JCI16432
- 800 29. Lim, S. Z. & Chua, E. W. Revisiting the role of thiopurines in inflammatory bowel disease through  
801 pharmacogenomics and use of novel methods for therapeutic drug monitoring. *Frontiers in*  
802 *Pharmacology* (2018). doi:10.3389/fphar.2018.01107
- 803 30. Hamerman, J. A., Ni, M., Killebrew, J. R., Chu, C. L. & Lowell, C. A. The expanding roles of ITAM  
804 adapters Fc $\gamma$ R and DAP12 in myeloid cells. *Immunological Reviews* (2009). doi:10.1111/j.1600-  
805 065X.2009.00841.x
- 806 31. Louis, E. *et al.* Association between polymorphism in IgG Fc receptor IIIa coding gene and  
807 biological response to infliximab in Crohn's disease. *Aliment. Pharmacol. Ther.* (2004).  
808 doi:10.1111/j.1365-2036.2004.01871.x
- 809 32. Moroi, R. *et al.* FCGR3A-158 polymorphism influences the biological response to infliximab in  
810 Crohn's disease through affecting the ADCC activity. *Immunogenetics* (2013).  
811 doi:10.1007/s00251-013-0679-8
- 812 33. McRae, B. L. *et al.* Fc receptor-mediated effector function contributes to the therapeutic  
813 response of anti-TNF monoclonal antibodies in a mouse model of inflammatory bowel disease. *J.*  
814 *Crohn's Colitis* (2016). doi:10.1093/ecco-jcc/jjv179
- 815 34. Chen, Y., Li, H., Lai, L., Feng, Q. & Shen, J. Identification of Common Differentially Expressed  
816 Genes and Potential Therapeutic Targets in Ulcerative Colitis and Rheumatoid Arthritis. *Front.*  
817 *Genet.* (2020). doi:10.3389/fgene.2020.572194
- 818 35. Chen, J. Y. *et al.* Association of FCGR3A and FCGR3B copy number variations with systemic lupus  
819 erythematosus and rheumatoid arthritis in Taiwanese patients. *Arthritis Rheumatol.* (2014).  
820 doi:10.1002/art.38813
- 821 36. Roberts, J. T., Patel, K. R. & Barb, A. W. Site-specific N-glycan Analysis of Antibody-binding Fc  $\gamma$   
822 Receptors from Primary Human Monocytes. *Mol. Cell. Proteomics* (2020).  
823 doi:10.1074/mcp.RA119.001733
- 824 37. Herter, S. *et al.* Glycoengineering of Therapeutic Antibodies Enhances Monocyte/Macrophage-  
825 Mediated Phagocytosis and Cytotoxicity. *J. Immunol.* (2014). doi:10.4049/jimmunol.1301249
- 826 38. Kotliarov, Y. *et al.* Broad immune activation underlies shared set point signatures for vaccine  
827 responsiveness in healthy individuals and disease activity in patients with lupus. *Nat. Med.*  
828 (2020). doi:10.1038/s41591-020-0769-8
- 829 39. Goh, K. II *et al.* The human disease network. *Proc. Natl. Acad. Sci. U. S. A.* (2007).  
830 doi:10.1073/pnas.0701361104
- 831 40. Singh, S., George, J., Boland, B. S., Castele, N. Vande & Sandborn, W. J. Primary non-response to

- 832 tumor necrosis factor antagonists is associated with inferior response to second-line biologics in  
833 patients with Inflammatory bowel diseases: A systematic review and meta-analysis. *J. Crohn's*  
834 *Colitis* (2018). doi:10.1093/ecco-jcc/jjy004
- 835 41. Rosen, M. J., Minar, P. & Vinks, A. A. Review article: Applying pharmacokinetics to optimise  
836 dosing of anti-TNF biologics in acute severe ulcerative colitis. *Alimentary Pharmacology and*  
837 *Therapeutics* (2015). doi:10.1111/apt.13175
- 838 42. Sarikaya, I. *et al.* Tc-99m dextran and Tc-99m HIG findings in patients with ulcerative colitis. *Clin.*  
839 *Nucl. Med.* (1999). doi:10.1097/00003072-199904000-00005
- 840 43. Finck, R. *et al.* Normalization of mass cytometry data with bead standards. *Cytom. Part A* (2013).  
841 doi:10.1002/cyto.a.22271
- 842 44. Bruggner, R. V., Bodenmiller, B., Dill, D. L., Tibshirani, R. J. & Nolan, G. P. Automated  
843 identification of stratifying signatures in cellular subpopulations. *Proc. Natl. Acad. Sci. U. S. A.*  
844 (2014). doi:10.1073/pnas.1408792111
- 845 45. N., P. *et al.* Usefulness of transcriptional blood biomarkers as a non-invasive surrogate marker of  
846 mucosal healing and endoscopic response in ulcerative colitis. *J. Crohn's Colitis* (2017).  
847 doi:10.1093/ecco-jcc/jjx091 LK -  
848 <http://sfx.cineca.it:9003/unito?sid=EMBASE&sid=EMBASE&issn=18764479&id=doi:10.1093%2Fecco-jcc%2Fjjx091&atitle=Usefulness+of+transcriptional+blood+biomarkers+as+a+non-invasive+surrogate+marker+of+mucosal+healing+and+endoscopic+response+in+ulcerative+colitis&stitle=J.+Crohn%27s+Colitis&title=Journal+of+Crohn%27s+and+Colitis&volume=11&issue=11&spage=1335&epage=1346&aulast=Planell&aufirst=N%C3%BAria&auinit=N.&aufull=Planell+N.&coden=&isbn=&pages=1335-1346&date=2017&auin>  
849  
850  
851  
852  
853
- 854 46. Li, S. *et al.* Molecular signatures of antibody responses derived from a systems biology study of  
855 five human vaccines. *Nat. Immunol.* **15**, 195–204 (2014).
- 856 47. Tsang, J. S. *et al.* Global analyses of human immune variation reveal baseline predictors of  
857 postvaccination responses. *Cell* (2014). doi:10.1016/j.cell.2014.03.031
- 858 48. Fernández, J. M. *et al.* The BLUEPRINT Data Analysis Portal. *Cell Syst.* (2016).  
859 doi:10.1016/j.cels.2016.10.021
- 860 49. Xu, W. *et al.* Mapping of  $\gamma/\delta$  T cells reveals  $V\delta 2+$  T cells resistance to senescence. *EBioMedicine*  
861 (2019). doi:10.1016/j.ebiom.2018.11.053
- 862 50. Zou, H. & Hastie, T. Regularization and variable selection via the elastic net. *J. R. Stat. Soc. Ser. B*  
863 *Stat. Methodol.* (2005). doi:10.1111/j.1467-9868.2005.00503.x
- 864



## 865 **Figure titles and legends**

866 **Fig 1| External data-driven disease specific molecular response metric, termed ‘health axis’, indicated**  
867 **that responders exhibit a trajectory of treatment-induced immune dynamics while non-responders**  
868 **exhibit an overall opposite direction. a**, Overview of the ‘health axis’ analysis. **b**, ‘Health axis’ assessment.  
869 Left panel, external public (GSE94648) based ‘health axis’ which defines a transition from IBD active  
870 disease through inactive disease to healthy state by PCA based differential expressed genes between  
871 disease/health states. Right panel, the projection distance of responding and non-responding patients’  
872 samples from our real-life cohort on the ‘health axis’ at W2 compared to baseline. **c**, Boxplots comparing  
873 responders’ and non-responders’ projection dynamics on the ‘health axis’ at each treatment interval  
874 (One-tailed permutation P-values shown,  $n=10000$ ). **d**, Scatterplot of the relationship between progress  
875 on the ‘health axis’ between W2 to baseline and between W2 to W14 ( $n=23$ , Spearman’s  $r=-0.44$ ,  $P<0.1$ ).

876 **Fig 2| Normal infliximab dynamics correlated with changes in monocytes and reduced expression of**  
877 **innate immune related pathways. a**, Cell frequency alterations following IFX treatment. Left panel, PCA  
878 presenting immune cell frequency changes following treatment based on 16 canonical immune  
879 populations determined by CyTOF. Arrow tail and head indicate the early W2 and later W14 relative to  
880 baseline compositional changes correspondingly. Ellipses represent the Euclidean distance from the  
881 center. Center panel, boxplots showing change in monocytes abundance following treatment relative to  
882 baseline in responders and non-responders (paired-Wilcoxon P-values shown). Right panel, scatterplot  
883 showing the relationship between changes in monocytes abundance (log transformed fold change relative  
884 to baseline) and changes in CRP (fold change relative to baseline) ( $n=23$ , Spearman correlation= $0.4$ ,  
885  $P=0.01$ ). **b**, Venn diagram showing dynamic features which significantly changed over time at 2 weeks and  
886 14 weeks post treatment compared with baseline for each response group using linear mixed-effects  
887 models ( $FDR<0.15$ ,  $n=1000$  &  $n=519$  permutations for responders and non-responders respectively). **c**,  
888 Scatterplot presenting the normal response network centrality of significantly enriched dynamic pathways  
889 at the early response period (GSEA,  $FDR<0.25$ ,  $n$  perm= $1000$ ). Colors indicate pathway median fold change  
890 expression at the early response period relative to baseline in responders (colored dots denote significant  
891 change in relative pathway score by Wilcoxon test,  $FDR<0.05$ ).

892 **Fig 3| ‘Disruption Networks’ as a framework to perform sample level inferences to identify individual**  
893 **variation in drug response. a**, ‘Disruption Networks’ concept, Left panel – a network is generated from a  
894 reference group (IFX responders) and then individual subjects from a test group (IFX non-responders) are  
895 iteratively added to the obtained response reference network, and the disruption in the correlation  
896 structure, defined as a dropout, is assessed for each patient across all edges. Right panel, representative  
897 highly disrupted edge demonstrating significant dropout values for non-responders. **b**, Feature specific  
898 differential signal between responders and non-responders dynamics at the early response period using  
899 disruption measurement of top mean drop intensity (x axis) and standard statistics by Wilcoxon test (y  
900 axis). **c**, ‘Disruption Networks’ statistic was aggregated across pathways to estimate sample specific  
901 disruption in the functional level, according to three parameters including percentage of disrupted edges,  
902 mean drop intensity and percentage of disrupted nodes. Heatmaps represent the disrupted dynamics in  
903 each parameter for each pathway and sample at W2 compared to baseline. Top significantly disrupted  
904 pathways are presented, defined as those with a complete agreement of all three parameters in the 0.8  
905 percentile. Line graphs describe the percentage of disrupted patients in each response group. **d**,  
906 Distribution of degree and betweenness centrality for nodes belonging to the top disrupted pathways  
907 compared to other nodes in the network. Significance was determined using permutation test ( $n$   
908 perm= $10000$ ). **e**, Meta disrupted pathway. Left panel, response network subgraph consist of nodes from  
909 the baseline differential disrupted pathways ( $FDR<0.1$ ). Diamond shape and orange color represent cell  
910 frequency, circle shape represent cell centered expression. Red circles indicate the fiber organization  
911 pathway related central axis. Right panel, enrichment analysis of the disrupted pathways by  
912 hypergeometric test.

913 **Fig. 4| Fiber-organization signaling, highly expressed in monocytes, predicts infliximab response at**  
914 **baseline.** **a**, Baseline expression differences in the disrupted pathways between response groups  
915 (NPMANOVA; bottom primary axis). Colors denote response network betweenness. The line graph  
916 represent correlation of changes in pathway score with changes in CRP (top secondary axis). **b**, The fiber  
917 organization differential nodes dynamics assessed by mean relative score across visits for each response  
918 group (Wilcoxon one-tailed P-values shown). **c**, Analysis of the cellular origin of the baseline differential  
919 fiber organization pathway using scRNA-seq analysis of PBMCs collected from representative responder  
920 and non-responder pre-treatment. Left panel, tSNE plot representing cell types identities annotated using  
921 singleR based on correlation profiles based on two reference datasets: the Blueprint-Encode and the  
922 Monaco Immune Cell datasets. Right panel, tSNE plot colored by the expended fiber organization scaled  
923 expression. The fiber organization baseline differential genes were expended through intersecting  
924 knowledge based (stringDB) and data-driven based (Monocyte single cell data) networks. **d**, The expended  
925 fiber organization scaled expression in the different monocyte subsets (Wilcoxon P-values shown). **e**,  
926 Mean mTNF expression in the different monocyte subsets as measured by CyTOF (Wilcoxon one-tailed P-  
927 values shown).

928 **Fig. 5| Validation of the fiber organization predictive signature in an independent IBD cohort and three**  
929 **public RA cohorts pre IFX treatment.** **a**, Baseline prediction of IFX response in the primary IFX cohort  
930 based on the expended fiber organization predictive signature score, in the cell adjusted space. Left panel,  
931 receiver operating characteristic (ROC) plots of 1000-bootsraps. The predictive signature was determined  
932 using elastic net ( $\alpha=0.5$ ,  $\lambda=0.26$ , 100 repeated 2-fold CV) based on the adjusted baseline differential  
933 fiber organization related genes. Significance was determined by permutation test ( $n \text{ perm}=10000$ ). Right  
934 panel, boxplots of the fiber organization predictive signature score pre-treatment, in the different  
935 response groups in the cell-centered bulk expression. **b**, Validation of the pre-treatment predictive fiber  
936 organization signature in an additional independent cohort of 20 and 9 responders and non-responders  
937 respectively by qPCR. Gene values were normalized to CD14 expression for cell-centered values. Left  
938 panel, bar graph of the pre-treatment normalized expression of the signature genes and signature  
939 pathway score in each response group (Wilcoxon one-tailed P-values shown). Right panel, ROC based on  
940 the predictive signature relative score. **c**, Prediction performance of fiber organization signaling signature  
941 in RA public expression datasets. Left panel, boxplots comparing the fiber organization signature related  
942 genes and the pathway score between IFX RA responders ( $n=43$ ) and non-responders ( $n=25$ ) in a  
943 representative public dataset GSE20690 (Wilcoxon one-tailed P-values shown). Right panel, ROC based on  
944 the predictive signature relative score of the relevant cohort. **d**, Meta-ROC presenting the predictive  
945 performance of three independent public RA cohorts.  
946

## 947 Supplemental Information titles and legends

948 **Supp. Fig 1| CyTOF reveals multiple cell subset changes in responders following treatment and**  
949 **differences between response groups. a,** Loading plot of PC2 based on major canonical cell composition  
950 changes at W2 and W14 compared to baseline. **b,** Cell-type specific alteration in cellular relative  
951 abundance during IFX treatment in responders and non-responders (paired-Wilcoxon P-values shown). **c,**  
952 Correlation of cell abundance changes at W2 and W14 relative to baseline, with changes in CRP  
953 (Spearman's correlation coefficients are shown, P-values are calculated by two tailed probability of the t-  
954 statistic,  $P < 0.05$  for significant p-values).

955 **Supp. Fig 2| The cumulative number of discovered dynamic features, at a range of target FDR values by**  
956 **data-type for each response group.** Top and bottom panels represent significant changes at W2 and W14  
957 relative to baseline respectively. FDR was calculated using the Benjamini-Hochberg procedure.  
958 Responders were subsampled ( $n=200$ ) to match the non-responder group size. For responders,  $\text{mean} \pm$   
959 SEM values are shown.

960 **Supp. Fig 3| Functional pathways associated with IFX response. a,** Scatterplot of p-values obtained by a  
961 comparison of pathway scores between W2 and baseline against those obtained by comparing W14 to  
962 baseline ( $-\log_{10}$  of paired-Wilcoxon P-values shown). Only globally enriched and network connected  
963 pathways were included. **b,** Pathway score related dynamics between W2 and W14 relative to baseline.  
964 Top 70 pathways are shown. Pathways are ordered by fold change effect size. P-values for pathway score  
965 differences between time points were calculated by paired-Wilcoxon test. Significance was determined  
966 by  $\text{FDR} < 0.05$  (Benjamini-Hochberg procedure). **c,** Heatmap representing a cell-specific contribution for  
967 the change in the dynamic pathways. The contribution was determined for each gene in the pathway by  
968 regressing its unadjusted fold change expression over the major peripheral cell type frequencies. The  
969 reported values represent the mean of the coefficients across all genes in the pathway. **d,** Correlation of  
970 pathway score expression with CRP. All time point and response groups are included. (Spearman's  
971 correlation coefficients are shown, P-values are calculated by two tailed probability of the t-statistic,  
972 Pathway which significantly correlated with CRP ( $\text{FDR} < 0.05$ , Benjamini-Hochberg procedure) are colored.

973 **Supp. Fig 4| Comparison of the differential signal between response groups dynamics as obtained by**  
974 **the 'Disruption Networks' framework and standard statistics in the feature level. a,** Feature specific  
975 differential signal between responders and non-responders dynamics at W2 relative to baseline, based  
976 on the top disrupted edge ratio (x axis,  $\text{FDR} < 0.1$  for dropout significance and 10<sup>th</sup> top percentile of  
977 disrupted edge ratio) and standard statistics by Wilcoxon test (y axis,  $\text{FDR} < 0.1$ ). **b,** Scatterplot showing  
978 feature specific disruption parameters of mean drop intensity against disrupted edge ratio. Points are  
979 colored by quartile thresholds ( $\text{FDR} < 0.1$  for dropout significance and 10<sup>th</sup> top percentile of the specific  
980 disruption parameter). The feature which agreed with the disruption parameters and standard Wilcoxon  
981 test is marked with black border.

982 **Supp. Fig 5| Baseline differences of the significantly dynamics disrupted pathways. a,** Heatmap  
983 representing the feature-level baseline differences among genes in the dynamics meta-disrupted pathway  
984 ( $\text{FDR} < 0.1$ , Wilcoxon test). **b,** Correlation between the canonical cellular frequencies as obtained by CyTOF,  
985 and the bulk unadjusted expression of the fiber organization related genes in responders (Spearman's  
986 correlation coefficients are shown, P-values are calculated by two tailed probability of the t-statistic). Only  
987 significant correlation values are shown ( $P < 0.05$  and  $|r| \geq 0.5$ ).

988 **Supp. Fig 6| scRNA-seq based comparison of the baseline fiber organization related expression between**  
989 **the main cell-types and response groups.** The fiber organization scaled score based on its baseline  
990 differential genes was compared between PBMCs major cell types, and between response groups for  
991 monocytes (Wilcoxon P-values shown).

992 **Supp. Fig 7| Intermediate monocytes functional pathways associated with the predictive fiber**  
993 **organization signature.** Heatmap representing the top 20 intermediate-monocytes specific enriched  
994 pathways associated with the predictive fiber-organization related signature is shown. Pathways were  
995 determined by co-expression network based on the pre-treatment expression of the signature predictive  
996 genes in intermediate monocyte based on the scRNA-seq data in each response group followed by  
997 enrichment analysis (Spearman's correlation, thinning net by 0.1 top percentile, P-adjust<0.05 for  
998 functional enrichment significance by hypergeometric test). Pathways displaying significant differences  
999 between response groups in each cell subset are colored (FDR<0.05 by Wilcoxon test).  
1000

## 1001 **Supplementary Table titles**

1002 **ST1:** Clinical and demographic characteristics of patients included in the primary real life CD cohort  
1003 **ST2:** CyTOF Panel  
1004 **ST3:** Cell type unsupervised clustering using Citrus algorithm  
1005 **ST4:** Luminex Panel. List of analytes tested in the Luminex assay  
1006 **ST5:** Differentially expressed features between CD and UC active patients, and healthy controls for the  
1007 construction of an external reference 'health axis'  
1008 **ST6:** Selection of highly informative PCs to best describe an health axis directionality from active,  
1009 through inactive disease states to healthy state using ordinal lasso  
1010 **ST7:** Dynamic features at W2 and W14 relative to baseline in responders and non-responders using  
1011 linear mixed-effects models  
1012 **ST8:** Normal anti-TNF response dynamics network at the early W2 response period  
1013 **ST9:** Clinical and demographic characteristics of patients included in the validation real-life CD cohort  
1014 **ST10:** qPCR primers used in the IBD validation cohort for measuring expression of the fiber organization  
1015 predictive signature

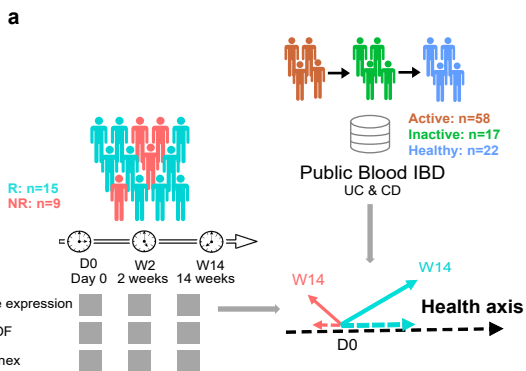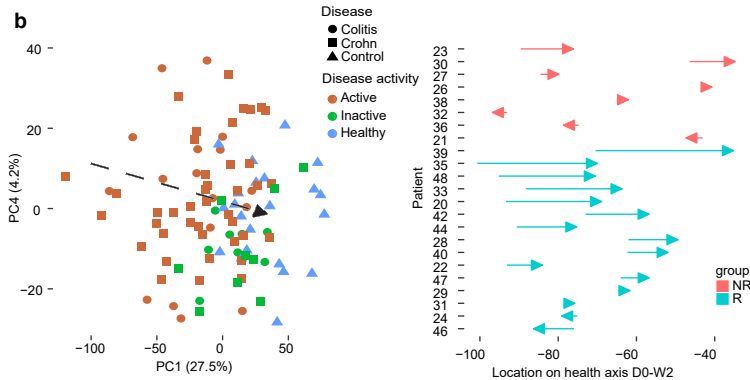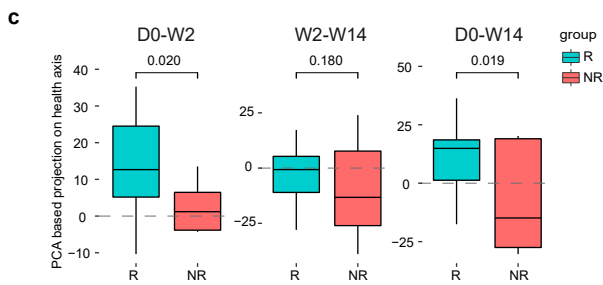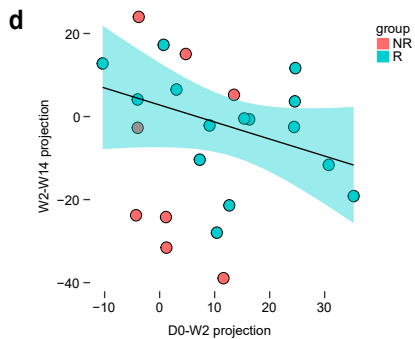

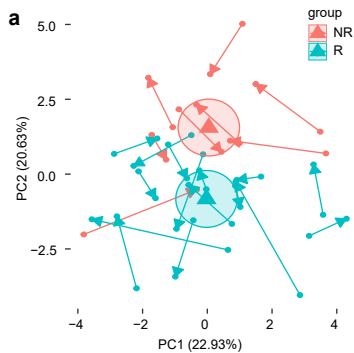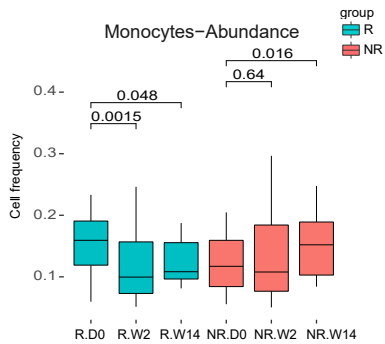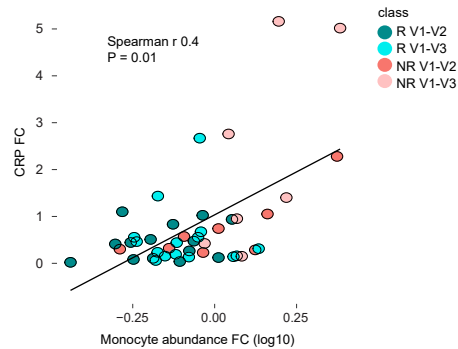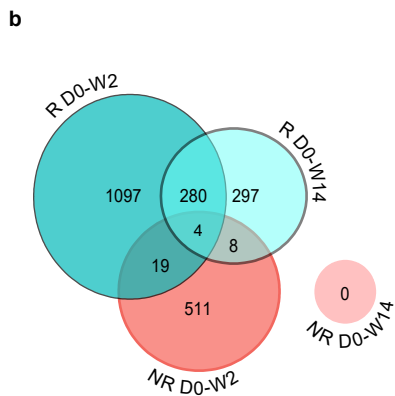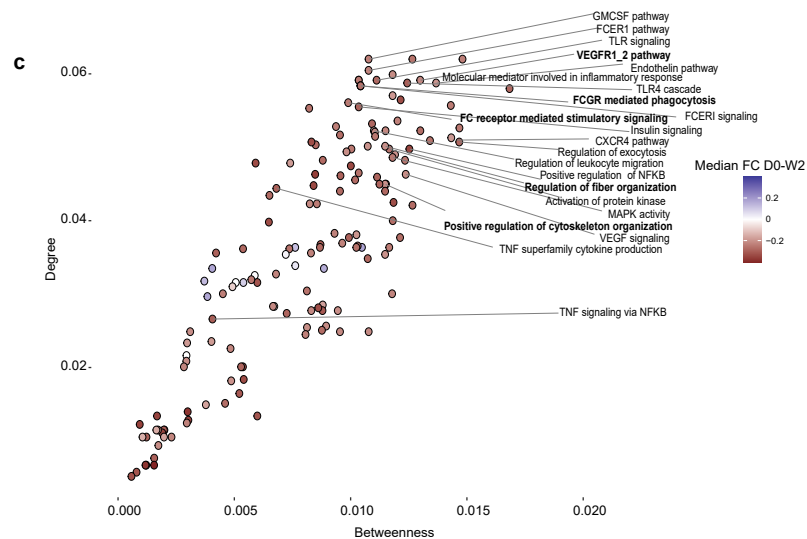



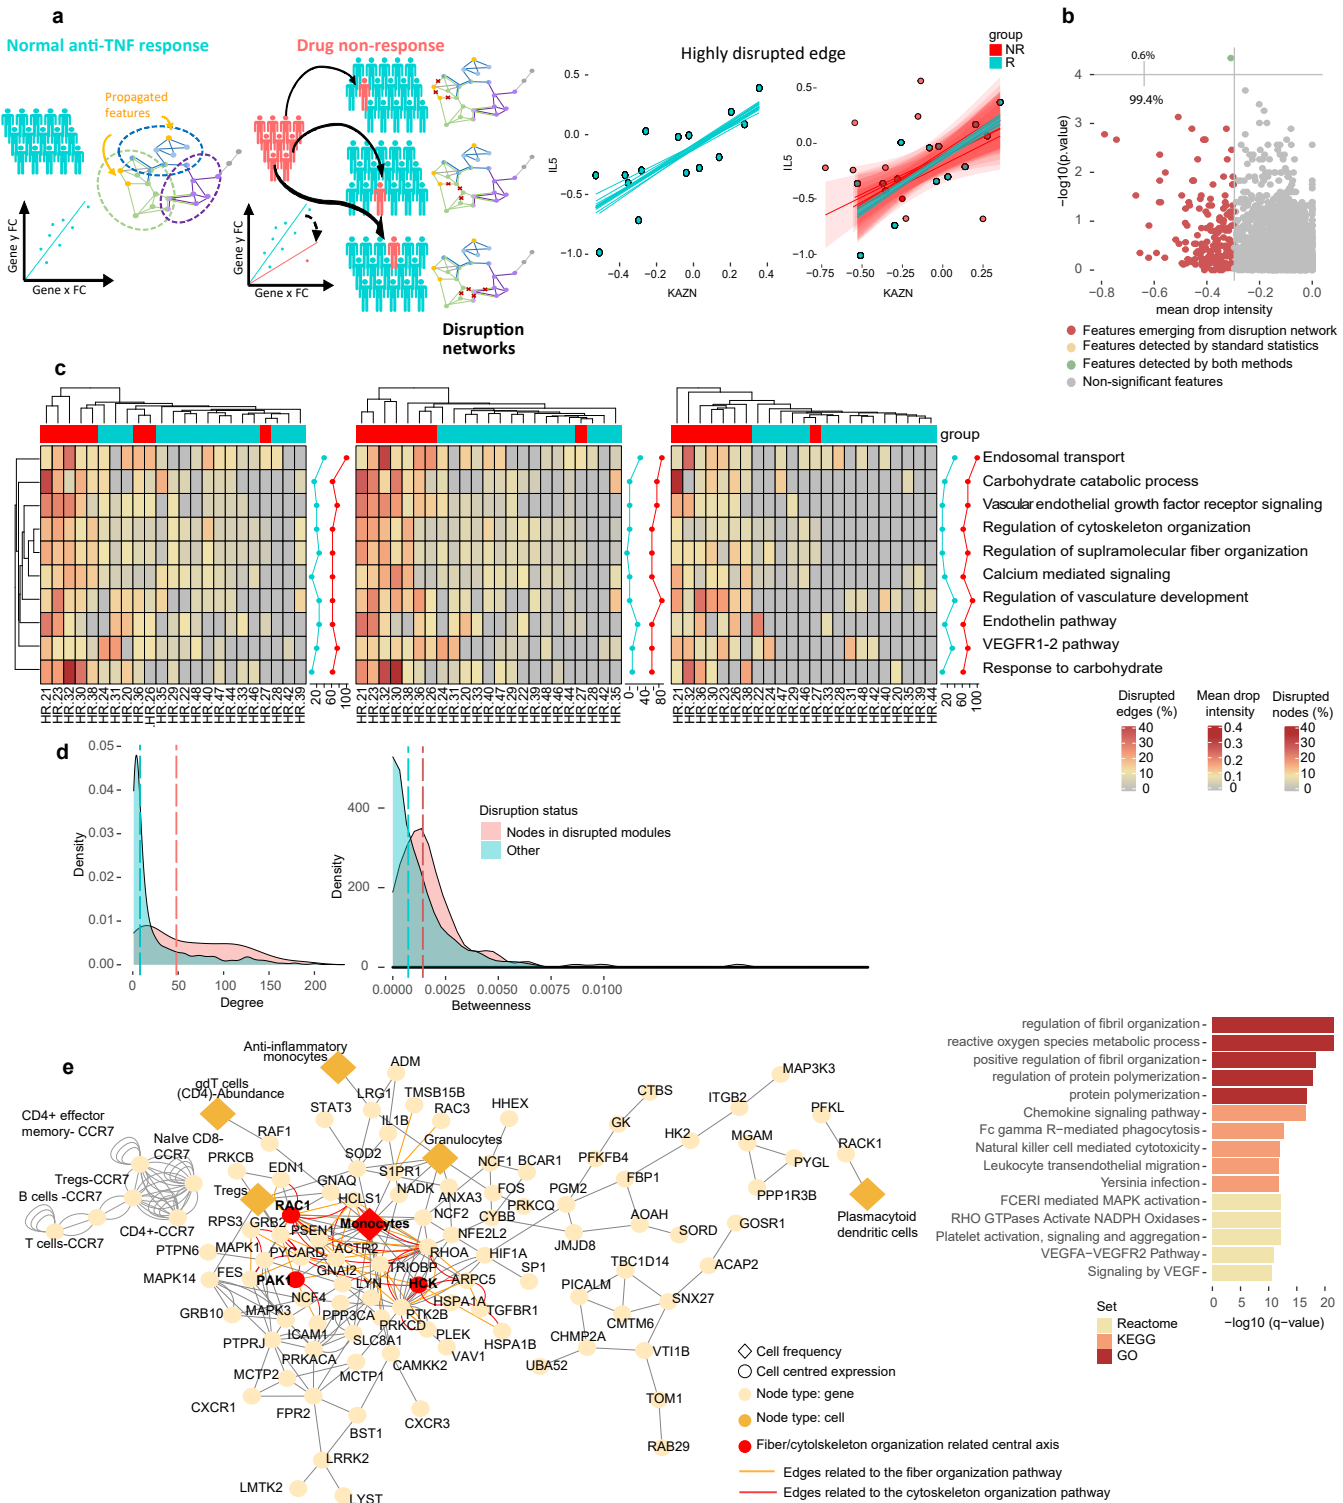

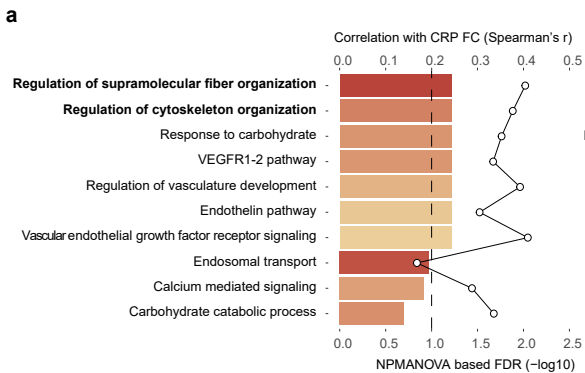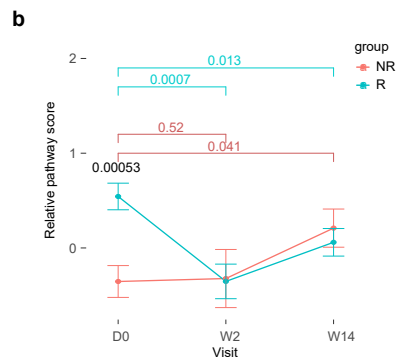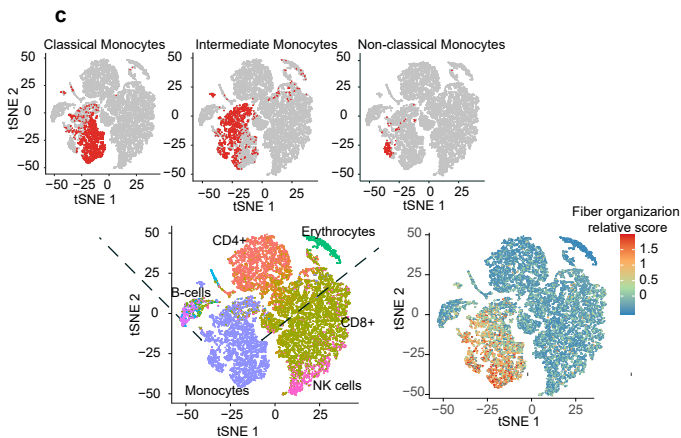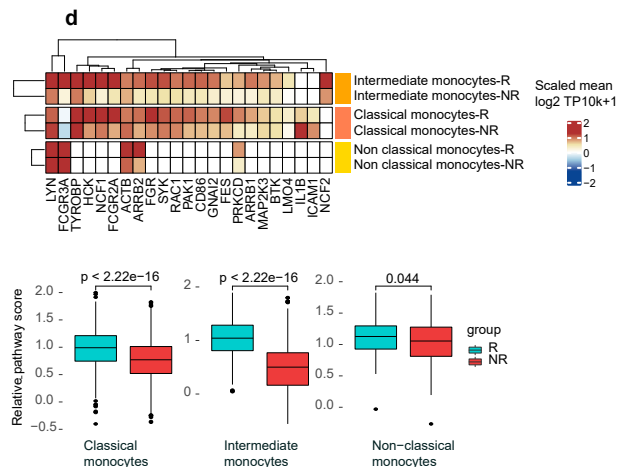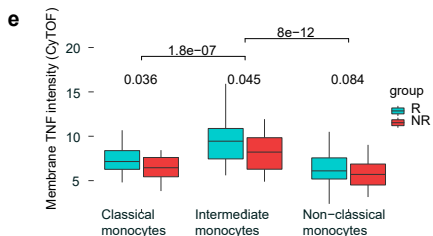

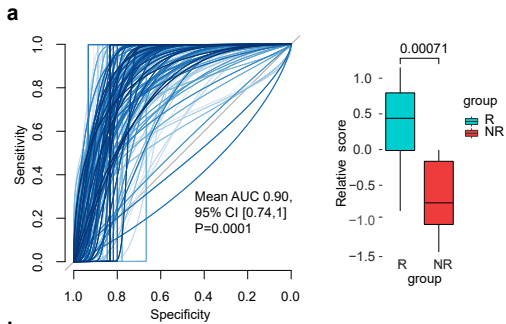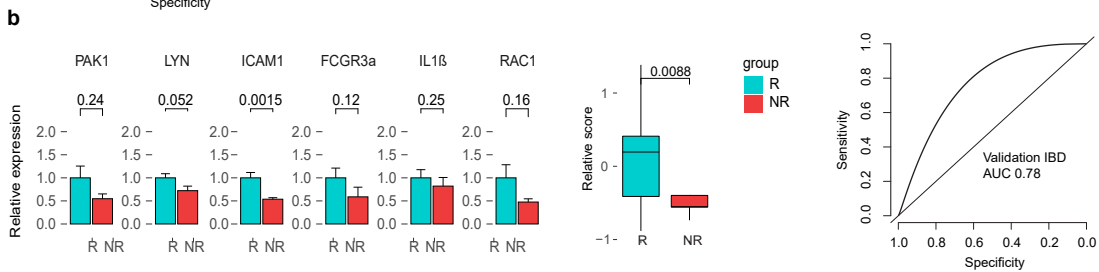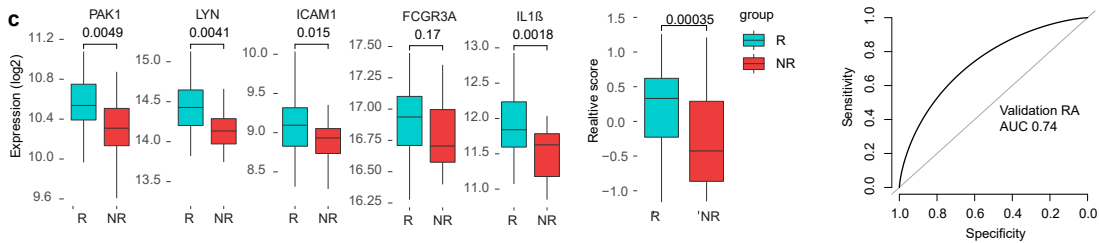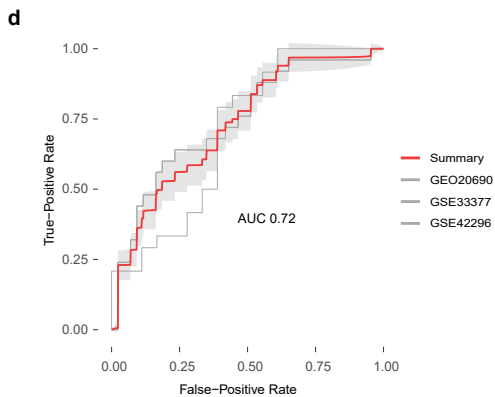

Source: http://biorxiv.org/content/10.1101/2021.06.16.448558v1.full.pdf
