1 **A personalized network framework reveals predictive axis of anti-TNF**  
2 **response across diseases**

3 Shiran Gerassy-Vainberg<sup>1,2</sup>, Elina Starosvetsky<sup>#1</sup>, Renaud Gaujoux<sup>#1,4</sup>, Alexandra Blatt<sup>#2</sup>, Naama  
4 Maimon<sup>1,2</sup>, Yuri Gorelik<sup>2</sup>, Sigal Pressman<sup>2</sup>, Ayelet Alpert<sup>1</sup>, Haggai Bar-Yoseph<sup>1,2</sup>, Tania Dubovik<sup>1</sup>, Benny  
5 Perets<sup>1</sup>, Adir Katz<sup>4</sup>, Neta Milman<sup>1</sup>, Yehuda Chowers<sup>\*1,2,3</sup>, Shai S. Shen-Orr<sup>\*1</sup>

6 on behalf of the Israeli IBD research Network (IIRN)

7 #, \* Contributed equally to the study

8

9 **Author affiliations**

10 1. Faculty of Medicine, Technion-Israel Institute of Technology, Haifa, Israel

11 2. Department of Gastroenterology, Rambam Health Care Campus, Haifa, Israel

12 3. Clinical Research Institute, Rambam Health Care Campus, Haifa, Israel

13 4. CytoReason, Tel Aviv 67012, Israel

14

15 **Corresponding author contact information:**

16 Shai Shen-Orr, Faculty of Medicine, Technion-Israel Institute of Technology, Haifa 32000, Israel;

17 [shenorr@technion.ac.il](mailto:shenorr@technion.ac.il) and Yehuda Chowers, Department of Gastroenterology, Rambam Health Care

18 Campus, Haifa, Israel; [y\\_chowers@rambam.health.gov.il](mailto:y_chowers@rambam.health.gov.il).

19

20

## 21 **Abstract**

22 Personalized treatment of complex diseases has been mostly predicated on biomarker identification of  
23 one drug-disease combination at a time. Here, we used a novel computational approach termed  
24 Disruption Networks to generate a new data type, contextualized by cell-centered individual-level  
25 networks, that captures biology otherwise overlooked when performing standard statistics. The new data-  
26 type extends beyond the 'feature level space', to the 'relations space', by quantifying individual-level  
27 breaking or rewiring of cross-feature relations. Applying disruption network to dissect high-dimensional  
28 blood data, we discover and validate that the RAC1-PAK1 axis is predictive of anti-TNF response in  
29 inflammatory bowel disease. Intermediate monocytes, which correlate with the inflammatory state, play  
30 a key role in the RAC1-PAK1 responses, supporting their modulation as a therapeutic target. This axis also  
31 predicts response in rheumatoid arthritis, validated in three public cohorts. Our findings support blood-  
32 based drug response diagnostics across immune-mediated diseases, implicating common mechanisms of  
33 non-response.

## 34 **Keywords**

35 Precision medicine, Individual-level network analysis, Drug response, Anti-TNF antibodies, Infliximab,  
36 Immune-mediated diseases, Inflammatory bowel disease, Rheumatoid arthritis, Pan-disease drug  
37 response diagnostics.

## 38 **Introduction**

39 Biologic therapies are used in a broad range of therapeutic areas including immune-mediated diseases,  
40 oncology, and hematology and have demonstrated effectiveness by improving disease clinical course,  
41 morbidity and patient quality of life. However, a subset of patients do not respond to therapy and  
42 therefore are exposed to the consequences of uncontrolled disease activity, unwanted side effects and  
43 increasing care costs. Therefore, the development of biomarkers for response prediction is an unmet  
44 medical need, necessary for achieving a favorable therapeutic index, cost/benefit ratio and overall  
45 improved patient care. Although biologics' targets are highly specific (e.g. PD1, TNF $\alpha$ ) and target particular  
46 molecular processes across diseases (e.g. CD8 T-cell exhaustion, or TNF induced inflammation), the  
47 presence of these pathways in an individual patient is necessary but not sufficient to predict response to  
48 therapy, implying a more nuanced therapeutic mechanism which may be disease specific<sup>1,2</sup>.

49 One of the most frequently used biologic drug classes are anti-TNF $\alpha$  antibodies, with sales of over \$US 25  
50 billion per year<sup>3</sup>. Anti-TNF agents are thought to exert their effects through several mechanisms, including  
51 TNF $\alpha$  neutralization, induction of cell and complement cytotoxicity through the FC drug fragment and  
52 cytokine suppression via reverse signaling or apoptosis<sup>4</sup>. Similar to other drugs and across inflammatory  
53 diseases including inflammatory bowel disease (IBD) and rheumatoid arthritis (RA), a sizable proportion  
54 of 20-40% of the treated patients, will primarily not-respond to treatment<sup>5,6</sup>.

55 Previous studies used systematic screening of in-house and meta-analysis data for the identification of  
56 biomarkers associated with anti-TNF $\alpha$  treatment failure. Different markers were identified in different  
57 disease contexts<sup>7</sup>. Among these, in IBD, Oncostatin M (OSM) was identified as a potent mucosal  
58 biomarker<sup>8</sup>. This gene correlated closely with Triggering Receptor Expressed On Myeloid Cells 1 (TREM1),  
59 a biomarker found by us, which was predictive of response in biopsy and importantly also in blood, albeit  
60 in an inverted ratio<sup>9</sup>. In RA, myeloid related sICAM1 and CXCL13, and type I IFN activity were associated  
61 with anti-TNF response<sup>10</sup>. The identification of these markers suggests that biomarkers of pretreatment

62 immune status may be useful for patient screening. However, little is known regarding molecular  
63 dynamics of anti-TNF response and resistance, and whether drug biomarkers are disease dependent, or  
64 represent a patient-specific property which can be generalized across diseases.

65 The availability of high-resolution molecular data provides opportunities for achieving improved modeling  
66 of the complex therapeutic landscape using systems biology and network-based approaches. Yet, most of  
67 the statistical methods used are based on population averages, which do not suffice to fully investigate  
68 these complex diseases. Although several personalized approaches were recently suggested for exploring  
69 sample-level network information<sup>11,12</sup>, these studies were not cell-centered, and did not decouple cell  
70 frequency and cell regulatory program changes. Network structure was used to identify individual  
71 alterations in cross-feature relationships between groups, however, these were validated only in the  
72 unicellular level. The same is true for the identification of individual-level time series analysis. Thus,  
73 immunologic as well as time-dependent qualifiers, within and across patients, must be accounted for  
74 when attempting to predict and reassess response to immunotherapy over the course of therapy and in  
75 context to standard methods of clinical response assessment.

76 We therefore employed a longitudinal cell-centered systems analysis, combining high-dimensional data  
77 of whole blood from anti-TNF responding and non-responding IBD patients at baseline and following two  
78 and fourteen weeks post first treatment. We focused on immune responses in blood, because although  
79 presenting an analytical challenge due to high background noise, blood-biomarkers have a clear  
80 advantage of accessibility, standardization, and cost-effectiveness. To understand individual variation in  
81 drug resistance, we devised a single sample-based network approach, termed 'Disruption Networks',  
82 which generates a new data type providing individual information of cross-feature relations, indicating  
83 changes in regulation. Using the new data-type information, we inferred patient-specific hypotheses for  
84 lack of response with respect to a global response network. We demonstrate that the monocytic  
85 expression of the RAC1-PAK1 axis, which is a final common pathway of multiple immune-receptor  
86 signaling cascades, is predictive of anti-TNF response in IBD as well as for the same treatment in RA,  
87 providing validation for the signature's predictivity and supporting common baseline elements that  
88 contribute to response across infliximab (IFX) treated immune-mediated diseases.

89

## 90 **Results**

91 **Treatment response is associated with forward movement along an inflammatory axis, whereas non-**  
92 **responders regress.**

93 To understand the cellular and molecular changes associated with IFX response and non-response, we  
94 performed longitudinal deep immunophenotyping of peripheral blood in Crohn's disease (CD) patients  
95 who received first-time therapy with IFX during standard clinical care (Fig. 1a, left, hereon IFX cohort).  
96 Patients were profiled by gene expression, CyTOF and Luminex, a total of three times: pre-treatment (day  
97 0), week 2 (W2) and week 14 (W14) post-treatment initiation. At W14, 15 patients showed clinical  
98 response whereas 9 were classified as non-responders at the study end (Supp. Table 1 for clinical  
99 demographics; see Methods for response classification).

100 To define an individual-specific unbiased expectation of peripheral blood immune dynamics during  
101 disease course, we used a public gene expression dataset of whole blood samples from healthy individuals  
102 and 75 IBD patients in varying disease states treated with standard of care therapies (Fig. 1a, right; see  
103 Methods). We constructed an external data-driven reference IBD axis (Fig. 1b, left), which describes in a

104 dimensionality-reduced Principal Component Analysis (PCA) space the molecular transition from active-  
105 through inactive disease to healthy- state, based on differentially expressed genes (hereon ‘inflammatory  
106 axis’, see Methods). Next, we projected the position of our in-house IFX cohort on the PCA (Fig. 1b, right)  
107 and calculated the distance each patient traversed on the axis over time, providing continuous molecular  
108 information to characterize a patient’s immune state shift (Fig. 1c). Analyzing the distance between paired  
109 sample time-points, we observed that responders progressed on the inflammatory axis (*i.e.*, a positive  
110 shift on the axis towards the centroid of healthy reference samples), while non-responders regressed on  
111 it (Figure 1c,  $P < 0.05$ , one-sided permutation test). Breaking up these dynamics by time point, we observed  
112 that responders exhibited increased progress along the inflammatory axis following first drug treatment,  
113 and reduced progress in the following period (Figure 1c). The negative correlation between progress along  
114 the axis between baseline-W2 and progress in the following segment W2-W14 suggests that patients  
115 progressing to ‘response’ early, slow down during subsequent timepoints whereas those showing a slow  
116 progress initially, progress more thereafter (Fig. 1d). In fact, temporal patterns in axis progression provide  
117 statistically significant context to the rate of response to therapies, that depends on immune contexture.  
118 Importantly our results suggest that clinical non-responders are immunologically affected by treatment  
119 as well, with an overall opposite direction from responders’ progress. Collectively, our inflammatory axis,  
120 captures blood molecular changes which are clinically relevant for treatment response.

### 121 **Early IFX response reduces expression of innate immune pathways attributed mainly to monocyte** 122 **function.**

123 To identify cellular changes following treatment in each response group, we characterized major immune  
124 cell compositional changes in 16 canonical immune populations (Fig. 2, Supp. Table 2-3 for CyTOF panel  
125 and Citrus clusters annotation). Then, to compare how cellular peripheral blood state differs as a function  
126 of treatment response, we computed a PCA on the fold change of patients’ cell phenotyping profiles (Fig.  
127 2a, left). We observed significant difference in cell abundance changes between responders and non-  
128 responders for W2 and W14 changes relative to baseline ( $P = 0.005$ , NPMANOVA).

129 Multiple cell subset changes in responders were already apparent at W2 including reduced abundance of  
130 monocytes, granulocytes, Tregs, naïve CD4+ T cells, CD4+ central memory T cells and increased abundance  
131 of CD4+ and CD8+ effector memory T cells and B cells ( $FDR \leq 0.15$ , Paired Wilcoxon test; Supp. Fig. 1a).  
132 Based on the PCA loadings we deduced that monocytes and Tregs were the primary drivers of changes  
133 following treatment (Supp. Fig. 1b), evidence for which was also supported by the univariate comparison  
134 showing that monocytes were significantly reduced in responders throughout both W2 and W14, whereas  
135 in non-responders monocyte frequency was unchanged in W2 and elevated at W14 ( $P = 0.0015$  and  
136  $P = 0.048$  in responders, as opposed to  $P = 0.64$  and  $P = 0.016$  in non-responders at W2 and W14 respectively,  
137 Paired Wilcoxon test). Moreover, monocyte frequency was also correlated with changes in CRP  
138 (Spearman’s  $r = 0.4$ ,  $P = 0.01$ ), suggesting their relevance to treatment response (Fig. 2a center, right and  
139 Supp. Fig. 1c for correlation of CRP with other cell-types). Taken together, our results demonstrate  
140 significant differential cell composition following IFX treatment as a function of response, with monocytes  
141 likely playing a major role.

142 Given the observed cell composition alterations, we performed a cell-centered analysis to identify  
143 changes in transcriptional programs following treatment in each response group, by adjusting the gene  
144 expression for variation in major cell-type proportions. This procedure places focus on detection of  
145 differences between conditions of the gene regulatory programs the cells are undergoing rather than  
146 those differences detected due to cell compositional differences, and has been shown to unmask

147 additional signal (i.e. false-negative of direct bulk analysis) while decreasing false-positives (Fig. 2b, see  
148 Methods)<sup>9</sup>. In this analysis, we identified 1400 (5.99%) and 589 (2.52%) differential features in responders  
149 ( $FDR < 0.15$ , permutation test; Supp. Tables 7) at W2 and W14 compared to baseline respectively,  
150 suggesting enhanced response at W2 followed by reduced dynamics in W14. Compared to responders,  
151 non-responders showed attenuated dynamics in the parallel treatment periods, with only 542 (2.32%,  
152 Supp. Table 7) differential features at W2 compared to baseline, and no significantly detected dynamics  
153 at W14. To ensure the differences in dynamics between the two response groups were not due to sample  
154 size, we subsampled responders to match the non-responder group size and observed that responding  
155 patients exhibit more dynamic changes compared to non-responders (Supp. Fig. 2). Furthermore,  
156 comparing the two response groups, we observed only a minor overlap in the post treatment dynamic  
157 features (23 features, 1.2% at W2). In line with the ‘inflammatory axis’, these results suggest that there  
158 are increased early dynamics in responders compared to non-responders and that responders and non-  
159 responders presented different alterations following treatment.

160 To understand the relationship during IFX response between gene regulatory programs in a biological  
161 context, we constructed a cell-centered co-expression network, which was expanded by known  
162 interacting genes, followed by functional enrichment analysis (see Methods, Supp. Tables 8 for network  
163 edges and Supp. Fig. 3b for functional enriched pathways respectively). Interestingly, despite this being a  
164 blood-based network, we noted genes which were previously associated with anti-TNF response in IBD  
165 biopsies such as *TREM1* and *OSM*<sup>8,9</sup>, suggesting that relevant signals originally detected in tissue, are also  
166 reflected in blood. We identified potential mediating pathways, i.e. pathways possessing higher  
167 connectivity to other nodes in the response network, using degree and betweenness centrality  
168 measurements (Fig. 2c).

169 We observed that most central pathways associated with the W2 early response were related to the  
170 innate immune system (Supp. Fig. 3b). At the pathway level, consistent with the ‘inflammatory axis’ and  
171 feature level analysis, we found augmented response at W2, which was attenuated in the following period  
172 (151 vs. 88 enriched dynamic pathways in responders at W2 and W14 respectively; Supp. Fig. 3a-b). As  
173 expected, among the innate related altered functions, we observed pathways related to downregulation  
174 of NF- $\kappa$ B and TNF signaling via NF- $\kappa$ B (Fig. 2c,  $FDR < 0.005$  for W2 vs. baseline pathway score comparison,  
175 by Wilcoxon test;  $FDR < 0.01$  for enrichment in network by GSEA). Pathways with high network centrality  
176 included downregulation of FC receptor signaling and phagocytosis, cytoskeleton organization, Toll-like  
177 receptors (TLRs) and vascular endothelial growth factor (VEGF) signaling responses (Fig. 2c; top 25<sup>th</sup>  
178 percentile for both degree and betweenness;  $FDR < 0.005$  for W2 vs. baseline, by Wilcoxon test;  $FDR < 0.1$   
179 for enrichment by GSEA). These pathways also correlated with CRP measured in the clinical setting  
180 (Spearman’s  $r$   $FDR < 0.05$  and Supp. Fig. 3d). Of note, FCYR is known to be regulated by TNF $\alpha$ <sup>13</sup> and  
181 mediates a number of responses, including the phagocytosis of IgG-coated particles, accompanied by  
182 cytoskeleton rearrangements and phagosome formation, central pathways that were downregulated in  
183 responders (Fig. 2c and Supp. Fig. 3b,  $FDR < 0.001$  for W2 vs. baseline, by Wilcoxon test;  $FDR < 0.15$  for  
184 enrichment by GSEA). We also observed the downregulation of reactive oxygen species (ROS) pathway,  
185 which is crucial for the digestion of engulfed materials in phagosomes ( $FDR < 0.001$  for W2 vs. baseline, by  
186 Wilcoxon test;  $FDR < 0.05$  for enrichment by GSEA). This pathway was also correlated with CRP (Spearman’s  
187  $r$  0.43,  $FDR < 0.005$ , Supp. Fig. 3b and Supp. Fig. 3d). To identify the most likely cell expressing these  
188 pathways, we regressed the unadjusted fold change gene expression on major blood immune cell  
189 abundance changes (see Methods). We observed that monocytes and granulocytes were the major  
190 contributors associated with the dynamic pathways (Supp. Fig. 3c). This further supports the considerable  
191 contribution of monocytes to treatment response, on top of their significant frequency alteration and  
192 their frequency correlation with CRP.

193 **‘Disruption Networks’ as a framework to understand individual variation in non-responders’ dynamics.**  
194 Whether non-responders’ transcriptional profile reflects fundamental routes of IFX resistance, is essential  
195 for tailoring treatment. To elucidate molecular mechanisms of individual-specific pathways of treatment  
196 non-response, we devised a systematic framework we term ‘Disruption Networks’ which generates a new  
197 data-type to provide individual-level information of cell-centered changes in cross-feature relations. The  
198 generation of the new data-type relies on studying relations between features across a predefined  
199 reference population of individuals (i.e., a population level reference network), and then inferring how  
200 these relations differ (i.e., are disrupted) at the single sample level. The new data-type can serve as an  
201 input to multiple analyses including integration, differential signal detection, patient stratification based  
202 on disruption profile, assessment of disruption in functional modules and evaluation of individual’s  
203 molecular network behavior under specific perturbation effects or biological conditions (Fig. 3a).

204 To identify how non-responding-individuals differ with respect to the IFX response dynamics, we  
205 iteratively added a single non-responding patient to the response reference network we had studied and  
206 calculated the disruption in the correlation structure in each edge for that patient (hereon ‘dropout’). This  
207 procedure was performed separately for each non-responder. We considered only negative dropouts,  
208 that is, events in which the relation (i.e., correlation) between two features was weakened once the non-  
209 responder data was spiked into the responders’ group, indicating deviance from treatment response  
210 (Supp. Fig. 4a, for an example). To evaluate non-responders’ dropout significance, we generated empirical  
211 null distribution of dropouts (‘normal response’ dropouts) by iterative addition of each responder’s  
212 sample to the other responders’ samples. We calculated P-values as a left-tail percentile, within the null  
213 distribution of the normal dropouts, which were further corrected for multiple testing (Fig. 3a; see  
214 Methods). By applying the ‘Disruption Networks’ framework, we considerably expanded the detected  
215 differential signal between response groups as compared to standard differential analysis (one feature by  
216 Wilcoxon test ( $FDR < 0.1$ ) vs. 180 features by mean drop intensity, including the single feature identified by  
217 Wilcoxon test ( $FDR < 0.1$  for dropout significance and 10<sup>th</sup> top percentile of mean drop intensity); Fig. 3b  
218 and Supp. Fig. 4b for mean drop intensity, disrupted edge ratio parameters and the agreement of both  
219 respectively).

220 To understand disruption in the functional context, we aggregated the dropouts to calculate a pathway-  
221 level personalized disruption (Fig. 3c for mean drop intensity and Supp. Fig. 4c for disrupted edge and  
222 node ratio parameters; see Methods). We found that the major disrupted dynamics at W2 was related to  
223 the cytoskeleton/fiber organization and VEGFR signaling which were central functions during normal  
224 treatment dynamics. Interestingly, nodes related to these disrupted pathways exhibited high centrality  
225 ( $P < 9.999e-05$  and  $P = 0.034$  for degree and betweenness correspondingly by permutation test; Fig. 3d). On  
226 the meta-pathway level, monocytes were the most central cell-type associated with the disrupted  
227 pathways (Fig. 3e, left, top 5<sup>th</sup> percentile for degree and betweenness centrality). The disrupted meta-  
228 pathway included the core genes consisting of the HCK-RAC1-PAK1 signaling cascade, which presented  
229 high combined degree and betweenness centrality ( $P = 0.017$ ,  $n = 1000$  random triple node subsampling).  
230 This core perturbed axis is a final common pathway involving signaling through several proximal immune-  
231 receptors by a range of inflammatory ligands including chemokines, growth factors such as VEGFR, and  
232 FC receptor ligands which induce FC-mediated phagocytosis involving coordinated process of cytoskeleton  
233 rearrangement<sup>14</sup>. Indeed, these pathways were functionally enriched in the disrupted meta-pathway ( $q$ -  
234 value  $< 0.05$ , hypergeometric test; Fig. 3e, right). The latter are also linked to ROS and NADPH oxidase  
235 activation through the regulation of RAC1<sup>15</sup>. Of note, suppression of RAC1-PAK1 signaling, predominately  
236 in innate immune cells was shown to mediate remission in CD<sup>16</sup>. Taken together, these observations  
237 showcase the power of ‘Disruption Networks’ to identify masked, individual level, signal and suggest that  
238 the RAC1-PAK1 signaling cascade, is significantly disrupted in non-responders, during treatment.

239 **RAC1-PAK1 signaling is elevated in responders' peripheral monocytes pre-treatment.**

240 We next asked whether cellular programs found to be disrupted during treatment dynamics can be  
241 identified pre-treatment, since direct differential analysis in the feature expression space did not yield  
242 significant signal. Looking at the feature level, we found that most of the pre-treatment differentially  
243 expressed genes were increased in responders, including genes involved in the RAC1-PAK1 axis ( $FDR < 0.1$ ,  
244 Wilcoxon test, Supp. Fig. 5a). On the pathway level we observed that the fiber organization pathway,  
245 presented pre-treatment disparity between the two response groups ( $FDR < 0.1$ , NPMANOVA) and  
246 correlated with clinical CRP (Spearman's  $r = 0.4$ ,  $P = 0.06$ ), in addition to its high centrality in the response  
247 network (Fig. 4a). The relative pathway score of the cytoskeleton-organization pathway was higher in  
248 responders pre-treatment compared to non-responders ( $P < 0.0006$ , one-tailed Wilcoxon test), and was  
249 downregulated following efficient treatment ( $P < 0.001$  and  $P < 0.05$  for W2 and W14 compared to baseline,  
250 one-tailed Wilcoxon test; Fig. 4b). This was in contrast to non-responders which showed insignificant  
251 dynamics at W2 and even an opposite trend in W14 ( $P = 0.52$  and  $P = 0.041$  for W2 and W14 compared to  
252 baseline, one-tailed Wilcoxon test; Fig. 4b).

253 The fiber organization pathway associated with treatment dynamics and response already at pre-  
254 treatment state, represents distinctive differences in cellular transcriptional states between response  
255 groups, rather than differences reflecting cellular composition alterations, as our analyses accounted for  
256 cell proportions. Therefore, we next aimed to dissect the cellular origin of the fiber organization related  
257 core genes. First, we tested the correlation between the canonical cellular frequencies as obtained by  
258 CyTOF, and the bulk unadjusted expression of the fiber organization genes (Supp. Fig. 5b). We observed  
259 that the majority of the genes in the target pathway were positively associated with monocytes  
260 abundance. To further validate the cellular origin and the fiber organization related transcriptional cell  
261 state in the two response groups, we performed single-cell RNA sequencing (scRNA-seq) using peripheral  
262 blood mononuclear cells (PBMCs) from pre-treatment samples of a representative responder and non-  
263 responder (Fig. 4c; see Methods). Assessment of the fiber organization related expression in the cellular  
264 level, confirmed that monocytes were highly associated with the distinctive pathway expression ( $P < 2.2e$ -  
265 16, for expression in monocytes compared to the other cell types, Wilcoxon test, Fig. 4c, right and Supp.  
266 Fig. 6).

267 To understand the molecular events associated with the fiber organization pathway in the relevant cell  
268 and subset specific context, we expanded the fiber organization differential genes through intersection of  
269 knowledge- and data-driven based networks (see Methods). Then, we assessed the pathway related  
270 expression in monocyte subsets, which were previously shown to exhibit distinct phenotypes and  
271 functions in health, and immune-mediated disease states<sup>17</sup>. The results indicated that intermediate  
272 monocytes contributed most to the fiber organization distinctive expression between the response  
273 groups, pre-treatment ( $|FC| = 2.13$ ,  $P < 2.2e-16$  in intermediate monocytes vs.  $|FC| = 1.3$ ,  $P < 2.2e-16$  and  
274  $|FC| = 1.1$ ,  $P < 0.05$  in classical and non-classical monocytes respectively by Wilcoxon test, Fig. 4d).  
275 Interestingly, we detected significantly increased membrane TNF (mTNF) on intermediate monocytes  
276 compared to the other subsets, by CyTOF ( $P < 5e-07$ , one-tailed Wilcoxon test, Fig. 4e), suggesting these  
277 cells serve as drug targets, thereby explaining their tight linkage to drug response.

278 **Pre-treatment RAC1-PAK1 axis is predictive for IFX response across immune mediated diseases.**

279 We next tested whether the pre-treatment fiber organization pathway could predict treatment response  
280 (see Methods). We observed that the pathway score of a set of 6 core genes (RAC1, PAK1, LYN, ICAM1,  
281 IL1B and FCGR3A) could discriminate responders from non-responders at a mean AUC of 0.90 (95CI 0.74,  
282 1;  $P=0.0001$  by Permutation test), supporting a common mechanism of non-response to treatment (Supp.  
283 Fig. 5c). By applying targeted network analysis of the predictive fiber organization pathway in  
284 intermediate monocytes, we found that the FCYR signaling and functionally related pathways including  
285 phagocytosis and ROS metabolism were highly enriched in the co-expression network effectively  
286 differentiating between response groups at baseline (Supp. Fig. 7).

287 To further validate our findings, we tested an additional independent validation cohort of 29 CD patients,  
288 which were naive to biological treatment and were treated with thiopurines or steroids only as a co-  
289 therapy (Supp. Table 9 for clinical demographics). The results indicated that the pre-treatment RAC1-PAK1  
290 axis, was differentially expressed between response groups in the validation cohort ( $P<0.01$ , Wilcoxon  
291 test) as well, supporting the primary findings and thereby demonstrating that reduced pre-treatment  
292 expression of the RAC1-PAK1 axis is associated with non-response (AUC=0.78; Fig. 5a).

293 To assess whether the predictive RAC1-PAK1 axis is disease dependent or whether it could be generalized  
294 across diseases, we tested public datasets of blood samples from RA patients, pre-IFX treatment  
295 (GSE20690<sup>18</sup>, GSE33377<sup>19</sup>, GSE42296<sup>20</sup>). Gene expression was adjusted to major cell type contributions  
296 which was evaluated by deconvolution (see Methods). The results confirmed the increased pre-treatment  
297 expression of the axis genes in RA responders, (representative cohort GEO20690, Fig. 5b). Application of  
298 fiber organization predictive signature to multiple pre-treatment RA cohorts separated IFX response  
299 groups effectively (Meta ROC AUC=0.72, Fig. 5c). These findings expand the predictive value of the RAC1-  
300 PAK1 axis to other IFX-treated related diseases such as RA. Taken together, these observations  
301 demonstrate that the baseline RAC1-PAK1 axis expression in monocytes differentiates response groups  
302 and ultimately impacts response potential across immune-mediated diseases.

## 303 Discussion

304 Despite substantial inter-individual heterogeneity and our growing ability to measure it, commonly used  
305 statistical frameworks for analyzing high-dimensional data describe changes happening on average  
306 between conditions or groups. This is especially true in the case of networks which form a natural way of  
307 describing the possible interactions occurring between measured biological species, yet are population-  
308 based, and thus limited in their ability to monitor individual variation from those interactions and the  
309 ensuing emergent phenomena these interactions yield. Here we studied the dynamics of IFX response in  
310 IBD, in a small cohort, over time. To address this challenge, we devised the ‘Disruption Networks’  
311 approach, a cell-centered personalized statistical framework which unmask differences between  
312 individuals. The approach enables a systematic dissection of IFX effect on response dynamics from blood,  
313 by generating a new data-type which quantifies individual-level breaking or rewiring of cross-feature  
314 relations. The generated data-type is cell-centered considering both cellular composition changes and  
315 changes in cellular regulatory programs, allowing us to identify robust functional pathways deviating from  
316 normal response in non-responders, and robustly associate these with drug resistance in both IBD and  
317 RA.

318 Although TNF is a pleiotropic cytokine, functioning in both the innate and adaptive immune system<sup>21</sup>, we  
319 found that the early response alterations following IFX treatment were mostly related to innate pathways  
320 of which monocytes were the major driver. Evidence supporting this has been previously implicated by



321 the decreased frequency of monocytes during treatment in anti-TNF treated IBD<sup>22</sup> and RA<sup>23</sup> patients.  
322 Furthermore, the anti-proliferative and cell-activation suppressive effect of IFX was shown to depend on  
323 FC-expressing monocytes in a mixed lymphocyte reaction<sup>24</sup>. In addition, the regained long term response  
324 following granulocyte/monocyte adsorption treatment following loss of response during IFX treatment  
325 further corroborates our findings<sup>25</sup>. Taken together, these results support the potential for subset specific  
326 targeted therapy to augment IFX treatment.

327 By applying the 'Disruption Networks' framework, we identified RAC1-PAK1 signaling, as a central  
328 pathway associated with IFX response. This pathway exhibited disrupted dynamics in non-responders and  
329 was predictive of treatment response at baseline. Although abnormal RAC1 signaling was linked to  
330 immune-mediated diseases pathogenesis<sup>26</sup>, its direct relation to anti-TNF response has not been  
331 demonstrated. The RAC1-PAK1 axis is a final common pathway shared by several proximal immune  
332 receptors, controlling actin cytoskeletal movement, activation of the respiratory burst and phagocytic  
333 activity in innate cells. RAC1 was identified as a susceptibility gene for IBD<sup>27</sup>, and TNF was shown to  
334 stimulate RAC1-GTP loading<sup>16</sup>, supporting efficacy of antagonizing this effect by anti-TNF. In line with our  
335 findings demonstrating IFX suppressive effect on the RAC1-PAK1 axis during treatment, thiopurines,  
336 another effective IBD treatment were also shown to inhibit RAC1 activity<sup>28</sup>. The superior effect of anti-  
337 TNF -thiopurines combination over monotherapy<sup>29</sup> suggests that the enhanced therapeutic effect is  
338 mediated not only by controlling anti-drug antibody (ADA) levels, but conceivably also by the induction of  
339 a mutual additive effect on RAC1 suppression. Interestingly, the TREM adaptor (TYROBP/DAP12), which  
340 we previously found to be predictive for anti-TNF response by meta-analysis<sup>9</sup>, was detected in the  
341 differential RAC1-PAK1 signature, exhibiting significant correlation with the RAC1-PAK1 axis in monocytes,  
342 and is also functionally related through shared signaling<sup>30</sup>.

343 The monocytes single-cell based RAC1-PAK1 co-expression network demonstrated pre-treatment  
344 differential expression, primarily in intermediate monocytes, related to FcγR dependent phagocytosis and  
345 interferon signaling. This is consistent with prior reports showing that FcγR affinity affects anti-TNF  
346 therapeutic response<sup>31-33</sup>. Interestingly, the RAC1-PAK1 axis was predictive of IFX responsiveness also in  
347 RA, an observation which provides additional validation for the signature predictivity and supports  
348 common baseline elements contributing to response across IFX-treated immune-mediated diseases.  
349 Similarly to IBD, also in RA, the RAC1-PAK1 upstream activator FcγR was linked to disease  
350 susceptibility<sup>34,35</sup>. The FcγR3A, which is a part of the predictive signature, is known as a key receptor for  
351 monocytes effector response including antibody-dependent cellular cytotoxicity (ADCC), immune IgG-  
352 containing complexes clearance and phagocytosis<sup>36,37</sup>. These further corroborate the common element of  
353 enhanced RAC1-PAK1 signaling through increased expression or affinity for FcγR3A expressed on  
354 monocytes that may enhance the efficacy of IFX in IBD and RA. These results extend the relevance of  
355 molecular commonalities for disease activity<sup>38</sup> and pan-pathology<sup>39</sup>, also to interconnected pathways of  
356 drug responsiveness across immune-mediated diseases.

357 Whether the RAC1-PAK1 axis and the upstream FcγR are applicable to IFX response in other immune-  
358 related diseases or other anti-TNF therapeutic antibodies remains to be determined. While we identified  
359 the RAC1-PAK1 axis as predictive for therapy response in IFX-naïve patients, our results do not yet provide  
360 an understanding of how this axis is expressed in previously-treated patients. Considering the backwards  
361 immune shift in non-responders along the 'inflammatory axis' we identified, analysis of previously-treated  
362 patients should be addressed separately. The 'inflammatory axis' further provides a potential explanation  
363 for the inferior response rates to subsequent treatments in treatment-experienced compared to naïve

364 patients treated with the same agents<sup>40</sup>. Of note, our real-life cohorts consisted of clinically comparable  
365 responding and non-responding groups, in terms of demographics and concurrent therapies, except for  
366 lower drug levels in non-responders at W14 in the primary cohort. The disrupted axis was identified at  
367 the early W2 response period in which drug levels were comparable and thus response is not expected to  
368 be affected by the subsequent difference. In this context, the lower drug levels are likely a consequence  
369 rather than a cause of non-response, maybe due to “inflammatory sink” drug consumption, or drug loss  
370 through a “leaky gut”<sup>41,42</sup>.

371 Blood-based pre-treatment biomarkers are highly important for precision medicine, since when identified  
372 across diseases and drugs as performed here, they offer the vision of data-driven choices for physician  
373 treatment and personalized care. Our results suggest that the road to this vision may be shorter than  
374 anticipated, as at least for immunotherapies, blood is a relevant tissue for signal detection and non-  
375 response mechanisms appear to be conserved across immune-mediated diseases. We note that this pan-  
376 disease drug response conserved pattern may not necessarily hold in biopsies from the site of disease,  
377 which being different tissues, may present different cells playing a role. Our combined experimental-  
378 computational approach, where small time series experiments are combined with an individual-level  
379 analytical framework, can be generalized to other diseases and conditions including mechanisms of drug  
380 mode of action, drug non-response, comparison of drug effects and disease courses. These will ultimately  
381 allow to make sense of blood and accelerate an era of immune-based precision diagnostics.

382

## 383 **Methods**

### 384 **Patients and study design**

#### 385 **Primary real-life IBD cohort**

386 A primary real-life cohort consisting of 24 Crohn’s disease (CD) patients who received IFX treatment at the  
387 gastroenterology department of the Rambam Health Care Campus (RHCC). All patients met the study  
388 inclusion criteria as follows: 1) Adequately documented active luminal CD, as phenotyped by a  
389 gastroenterologist with expertise in IBD. 2) Documented decision to initiate full IFX induction regimen  
390 with 5 mg/kg induction dosing (i.e., at weeks 0, 2, 6). Patients that had past exposure to Infliximab,  
391 Adalimumab or Vedolizumab, or patients who had active infection including febrile diseases or intra-  
392 abdominal or perianal abscess were excluded. The study was approved by the institutional review board  
393 (0052-17-RMB), and patients provided written informed consent. Demographic and clinical characteristics  
394 of the patients are shown in Supp. table 1.

395 Patient samples were obtained at three time points: at baseline, before IFX treatment, and two and  
396 fourteen weeks post first treatment and assayed for gene expression microarray data, high-resolution  
397 granulocytes and lymphocytes subtype frequencies and functional markers by CyTOF, and a panel of 51  
398 cytokines and chemokines by Luminex. CyTOF panel including Clone, vendor, and conjugation  
399 information, and Luminex panel are detailed in Supp. table 2 and 3 respectively.

400 Patient response classification was defined by decision algorithm, which we used and described previously  
401 <sup>9</sup>. Briefly, patients were classified as responders based on clinical remission, which was defined as  
402 cessation of diarrhea and abdominal cramping or, in the cases of patients with fistulas, cessation of fistula  
403 drainage and complete closure of all draining fistulas at W14, coupled with a decision of the treating

404 physician to continue IFX therapy at the current dosing and schedule. In patients that were initially  
405 clinically defined as partial responders, classification was determined by a decision algorithm that  
406 included the following hierarchical rules: 1) steroid dependency at week fourteen; 2) biomarker dynamics  
407 (calprotectin and CRP) and 3) response according to clinical state at week 26. Applying the decision  
408 algorithm and exclusion criteria, yielded a final study cohort of 15 and 9 responding and non-responding  
409 patients respectively.

410 As shown in Supp. table 1, responders significantly reduced CRP, already at W2 post first treatment while  
411 non-responders presented a trend of reduced CRP at W2, but their CRP level following 14 weeks was  
412 elevated and significantly higher than CRP level in responders. No significant difference was found in  
413 target TNF $\alpha$  levels, neither in responders or non-responders, as measured by either serum cytokine level  
414 using Luminex or by adjusted gene expression. As expected, IFX drug levels were shown to be significantly  
415 reduced, in both responders and non-responders at W14 compared to W2, due to the transition from  
416 induction to maintenance therapy. Drug levels of responders were significantly higher compared to non-  
417 responders at W14. However, at W2, no significant difference in drug levels was measured. Responders  
418 also showed improved albumin levels along treatment, with significantly higher levels compared to non-  
419 responders at W14. All other parameters were comparable between the two response groups.

#### 420 **Validation real life IBD cohort**

421 The validation cohort consisted of 29 CD patients from the RHCC, which were classified to 20 and 9 clinical  
422 responding and non-responding respectively patients according to the above-described decision  
423 algorithm (Supp. table 9).

#### 424 **CyTOF sample processing and analysis**

425 A total of  $2 \times 10^6$  cells of each sample were stained (1 h; room temperature) with a mixture of metal-  
426 tagged antibodies (complete list of antibodies and their catalog numbers is provided in Supp. table 2). This  
427 mix contained antibodies against phenotyping markers of the main immune populations and some central  
428 cytokine and chemokine receptors. All antibodies were validated by the manufacturers for flow  
429 application (as indicated on the manufacturer's datasheet, available online) and were conjugated by using  
430 the MAXPAR reagent (Fluidigm Inc.). Iridium intercalators were used to identify live and dead cells. The  
431 cells were fixed in 1.6% formaldehyde (Sigma-Aldrich) at 4°C until they were subjected to CyTOF mass  
432 cytometry analysis on a CyTOF I machine (Fluidigm Inc.). Cell events were acquired at approximately 500  
433 events/s. To overcome potential differences in machine sensitivity and a decline of marker intensity over  
434 time, we spiked each sample with internal metal-isotope bead standards for sample normalization by  
435 CyTOF software (Fluidigm Inc.) as previously described<sup>43</sup>.

436 For data preprocessing, the acquired data were uploaded to the Cytobank web server (Cytobank Inc.) to  
437 exclude dead cells and bead standards. The processed data were analyzed using Citrus algorithm, which  
438 performs hierarchical clustering of single cell-events by a set of cell-type defining markers and then assigns  
439 per sample, per cluster its relative abundance in each sample as well as the median marker expression for  
440 each functional marker per cluster<sup>44</sup>. Citrus analysis was applied separately on PBMCs and Granulocytes  
441 population in each sample using the following parameters: minimum cluster size percentage of 0.01 and  
442 0.02 for PBMCs and Granulocytes respectively, subsampling of 15,000 events per sample and arcsin  
443 hyperbolic transform cofactor of 5. The gating for the classification of the clusters is detailed in Supp. table  
444 3.

#### 445 **Blood transcriptome analysis**

446 Whole blood was maintained in PAXgene Blood RNA tubes (PreAnalytiX). RNA was extracted and assayed  
447 using Affymetrix Clariom S chips (Thermo Fisher Scientific). The microarray data are available at the Gene  
448 Expression Omnibus database (<http://www.ncbi.nlm.nih.gov/geo/>). The raw gene array data were  
449 processed to obtain a log<sub>2</sub> expression value for each gene probe set using the RMA (robust multichip  
450 average) method available in the affy R package. Probe set annotation was performed using affycoretools  
451 and clariomshumantranscriptcluster.db packages in R. Data were further adjusted for batch effect using  
452 empirical Bayes framework applied by the Combat R package.

453 Gene expression data were further adjusted for variations in frequency of major cell types across samples  
454 as measured by CyTOF, including CD4<sup>+</sup> T cells, CD8<sup>+</sup> T cells, CD19<sup>+</sup> B cells, NK cells, monocytes and  
455 granulocytes, to allow detection of differential biological signals that do not stem from cell proportion  
456 differences, which might be otherwise masked in unadjusted gene expression data. Adjustment was  
457 performed using the CellMix R package.

#### 458 **Cytokines and chemokines measurement using Luminex bead-based multiplex assay**

459 Serum was separated from whole blood specimens and stored at -80°C until used for cytokine  
460 determination. Samples were assayed in duplicate according to the manufacturers' specifications  
461 (ProcartaPlex™ Immunoassay, EPX450-12171-901, eBioscience, Cytokine/Chemokine/Growth Factor 45-  
462 Plex Human Panel 1, Supp. table 4).

463 Data were collected on a Luminex 200 instrument and analyzed using Analyst 5.1 software (Millipore) and  
464 NFI (Median Fluorescence Intensity) values were used for further data processing. A pre-filtering was  
465 applied as follows: samples with low mean bead count, below 50 were excluded from analysis. In addition,  
466 duplicates with high CV values (Coefficient of variation) above 40% were omitted. NFI values with low  
467 bead count, below 20 were filtered out, but in cases which one replicate had acceptable bead count and  
468 the CV values for both replicates were less than 25%, NFI values were retained.

469 Finally, net MFI values were calculated by blank reduction followed by log<sub>2</sub> transformation. Data were  
470 further adjusted for batch effect using the empirical Bayes framework applied by the Combat R package.

#### 471 **Characterization of IFX responders and non-responders' dynamics through integrative molecular 472 response axis combining external and in-house data**

473 An integrative molecular response axis was constructed to recapitulate the complex nature of anti-TNF $\alpha$   
474 response progression dynamics which enables to track individual immune dynamics of both responding  
475 and non-responding patients. This methodology was assessed using an external data-based axis.

476 For unbiased definition of the 'inflammatory axis' and validation of our own data we used public gene  
477 expression data of whole blood from 25 UC patients and 50 CD patients in active or inactive disease states,  
478 available in Gene Expression Omnibus (GSE94648). The patients in this external cohort were treated with  
479 different medications including 5-ASAs, Immunosuppressants, anti-TNF agents, steroids and combinations  
480 of these therapies, as previously described<sup>45</sup>, representative of a relatively large portion of the treated  
481 IBD patient population. The analysis was performed in several steps: (1) Differential expression analysis  
482 between active disease and healthy states for UC and CD separately (Supp. Table 5), using the limma R

483 package, followed by PCA (Principal Component Analysis). (2) Ordinal lasso was used to select the principal  
484 components that best describe the desired directionality from active through inactive to healthy state,  
485 based on optimal absolute coefficient values and percentage of variance explained parameters (Supp.  
486 Table 6). (3) The ‘inflammatory axis’ coordinates were defined based on initial and terminal points  
487 determined as the mean of the two end-point coordinates of active and healthy states. (4) Applying vector  
488 multiplication (dot product) for the calculation of the projection of sample vector from our in-house  
489 cohort in the direction of the external ‘inflammatory axis’, to estimate sample position on the axis. (5)  
490 Evaluation of the distance of patient samples between two time points based on sample axis location.

## 491 **Multi-omics network of anti-TNF blood response dynamics**

### 492 **Core co-expression response network**

493 To identify features that change over time in responders, a linear mixed-effects model was used, in which  
494 time was treated as a fixed effect and individuals were treated as a random effect (lmer R package) to  
495 allow testing differential expression by time while accounting for between-subject variations. P-values  
496 were calculated empirically through a permutation test ( $n_{\text{perm}}=1000$ ). In each permutation, feature  
497 measurements were shuffled between visits for each responding patient. Permutation based p-values  
498 were obtained by comparing the absolute value of the non-permuted  $\beta$  coefficient for each feature to the  
499 null distribution of permuted  $\beta$  coefficients for the same feature. In order to calculate FDR based on the  
500 permutation results, permuted p-value was determined for each permuted  $\beta$  coefficient, by comparing  
501 the tested permuted  $\beta$  coefficient to the distribution of the other permuted  $\beta$  coefficients for each feature.  
502 Then FDR was estimated by comparing the non-permuted p-values to the null distribution of the  
503 permuted *p-values*. A similar calculation was performed for non-responders ( $\max n_{\text{perm}}=512$ ).  
504 In addition to the determination of dynamic features in the full responders’ sample data, a random  
505 subsampling of samples from the responders group, without replacement, was applied to achieve equal  
506 sample size between responders and non-responders. Two-hundred subsamples were generated and  
507 tested using linear mixed-effects models. In this part, for the comparison of equally sized responders and  
508 non-responders’ groups, p-values were calculated based on the t-statistic using the Satterthwaite  
509 approximation, implemented in the lmerTest R package, followed by multiple hypotheses correction  
510 using the Benjamini-Hochberg procedure.  
511 Co-expression network based on V1-V2 fold-change expression values of the significantly altered features  
512 ( $\text{FDR}<0.15$ ) was constructed, based on pairwise Spearman’s rank correlation using the psych R package.  
513 Filtering was applied to remove feature-pairs with insignificant correlation with a cutoff of  $\text{FDR}<0.1$ .

### 514 **Network propagation**

515 Network propagation procedure was applied to enhance the biological signal of the obtained networks as  
516 previously described<sup>46</sup> with slight modifications. Briefly, for each node in the network, protein interactors  
517 with a combined score above 700 were extracted based on STRING database (functional protein  
518 association networks; <https://string-db.org/cgi/download.pl>) using STRINGdb R package. A node  
519 interactor was added as a linker gene to the network if its own interactors (hubs) were significantly  
520 enriched in the core network features. Enrichment was calculated using the hypergeometric test in the  
521 stats R package. Calculated p-values were adjusted for multiple hypotheses using the Benjamini-Hochberg  
522 procedure. A cutoff of  $\text{FDR}<0.05$  was selected for significant enrichment of the tested interactor hubs in  
523 the immune network.

### 524 **Functional enrichment assessment for the response network**

525 To assess dynamics in the functional level, genes were grouped to functional sets by using a semi-  
526 supervised approach combining both network structure and known gene set annotations from Hallmark,  
527 Kegg, Reactome, Biocarta, PID and BP Go terms. Each edge in the network was classified to a specific  
528 pathway if its two linked nodes were annotated in the same biological group. Pathways with less than 5  
529 mapped edges were filtered out. This was followed by a global gene set enrichment analysis using fGSEA  
530 (FDR<0.15, nperm=1000, minSize=10, maxSize=400).

531 The dynamic enriched pathway structures were further tested for significance by comparing the density  
532 (graph density score) of each pathway associated sub-network to a parallel sub-network density obtained  
533 from 100 random networks with a matched size according to the Erdos-Renyi model which assigns equal  
534 probability to all graphs with identical edge count (igraph R package). P-value was evaluated as the  
535 proportion of random module density scores that were higher than the real module density score.  
536 Additional filtering was applied according to the number of connected components in a pathway sub-  
537 graph (igraph R package). Only highly connected pathways (percentage of largest connected  
538 component>50%, size of the connected component>10 ) were included.

539 The dynamic pathways list was further condensed by filtering out high overlapping pathways using Jaccard  
540 index. Accordingly, in overlapping pathways pairs that presented a Jaccard index above 0.5 the smaller  
541 module was omitted.

542 To further associate the assigned pathways with treatment response, the Wilcoxon test was used to  
543 compare V1 to V2 and V1 to V3 relative pathway scores in responders and non-responders. p-values were  
544 adjusted for multiple hypotheses using the Benjamini-Hochberg procedure (FDR<0.05). Relative pathway  
545 scores were calculated for each sample as previously described<sup>38,47</sup> (see Relative pathway score  
546 evaluation). To assess cellular contributions for each pathway, the non-adjusted expression of each gene  
547 in the dynamic pathways was regressed over the major peripheral cell type frequencies as determined by  
548 CyTOF including granulocytes, CD4 and CD8 T cells, B cells, NK cells and monocytes. The cell-specific  
549 contribution to each pathway was determined as the mean of the coefficients of the tested cell type across  
550 all genes in the module. The centrality of each pathway in the response network was also evaluated by  
551 calculating the pathway based mean betweenness and degree across all gene members of the pathway  
552 (igraph R package). To further assess the clinical relevance of the dynamic pathways to the treatment  
553 response, the calculated pathway score at all tested time points was correlated with CRP using Spearman's  
554 rank correlation test.

#### 555 **Relative pathway score evaluation**

556 The expression of each gene in the pathway was standardized by the z-score transformation, to enable  
557 comparable contribution of each gene member to the pathway score, followed by mean value calculation  
558 across the transformed genes in the pathway for each sample.

#### 559 **'Disruption Networks' framework**

560 To understand individual variation in non-response dynamics, we developed an approach termed  
561 'Disruption Networks' in which individual non-responders are iteratively added to the obtained normal  
562 IFX response network, and the disruption in the correlation structures is assessed for each edge in the  
563 reference response network. The disruption is evaluated in the node (gene/cell) or the module level to  
564 determine biological mechanisms that may explain patterns of the non-response.

565 More specifically, consider a feature matrix  $F_{n \times m}$  where  $n$  is the number of samples for a given condition,  
566 in our case,  $n$  is the number of samples of responding patients and  $m$  is the number of features, where

567  $f(i,j)$  refers to a fold change measured value at a given time point relative to baseline, of the  $j$ -th feature  
568 in the  $i$ -th sample. Let matrix  $R_{m \times m}$  be the feature pairwise Spearman's rank correlation matrix based on  
569  $F$  which represents the global response network, where  $r(j,k)=\text{cor}(j,k)$  for genes  $j$  and  $k$ . Insignificant  
570 correlation values according to FDR thresholds, as described above, were presented as NAs in the matrix.

571 The 'Disruption Networks' construction was assessed individually for each non-responder as follows: a  
572 new  $F'_{(n+1) \times m}$  matrix was generated by the addition of the tested non-responder to the responders'  
573 samples. Based on  $F'$ , a new pairwise Spearman's rank correlation matrix was calculated to obtain  $R'_{m \times m}$ ,  
574 in which  $r'(j,k)$  is the correlation between  $j$  and  $k$  genes when including the non-responder in the  
575 responders' samples.

576 For correlation coefficients comparison, correlation coefficient values were transformed using Fisher  $z$ -  
577 transformation by the following formula:

578  $z(r) = 0.5 * \ln\left(\frac{1+r}{1-r}\right)$  and a standard error of  $SEz(r) = \frac{1}{\sqrt{n-3}}$  where  $n$  is the number of samples.

579 We define a 'disruption' term as the drop in the Fisher  $z$  transformed values between two genes as a result  
580 of the non-responder addition using the statistical  $z$  score which is defined as:

581 
$$\text{disruption}(j, k) = z \text{ score} = \frac{z(r') - Z(r)}{\text{Pooled.SEz}} = \frac{z(r') - Z(r)}{\sqrt{\frac{1}{(n+1)-3} + \frac{1}{n-3}}}$$

582 Only negative values of  $\text{sign}(r * (z(r') - Z(r)))$ , which indicate weakening of the original  
583 correlation obtained in responders were included, while positive values were set to zeros. Drop degree of  
584 confidence for non-responders was assessed empirically for each drop value in each edge, based on the  
585 non-responder drop value percentile in the responders' normal drop distribution. This was further  
586 corrected for multiple testing using the Benjamini-Hochberg procedure. Edges with drop adjusted  
587 percentile  $<0.1$  were considered as significantly disrupted. Insignificant drop values were set to zeros.  
588 Analysis of disruption parameters in the feature level, revealed a considerably expansion of the detected  
589 differential signal between response groups, compared to standard differential analysis by Wilcoxon test.  
590 While using the Wilcoxon test we detected only one feature (0.06%), with significant differential dynamics  
591 between response groups at W2, we identified this feature together with 179 additional features (10%)  
592 when using disruption parameter of top mean drop intensity (FDR $<0.1$  by Wilcoxon test, FDR $<0.1$  for  
593 significant dropout and top 0.1 percentile of mean drop intensity, Figure 3b). We observed similar results  
594 for the disrupted edge ratio (0.06% Vs. 14.4% significant features identified by Wilcoxon test (FDR $<0.1$ )  
595 and top disrupted edge ratio parameter (FDR $<0.1$  for significant dropout and top 0.1th percentile of node  
596 disrupted edges) respectively, Supp. figure 4a). Testing the agreement of both disruption parameters, we  
597 identified 9.4% dynamics differential features including the single feature identified by Wilcoxon test  
598 (Supp. figure 4b).

599 Disruption was also measured in the pathway level for each individual using three different  
600 measurements: (1) Pathway specific mean drop intensity in which a mean drop intensity was calculated  
601 across the relevant edges in the module, for a specific individual. (2) Pathway specific percentage of  
602 disrupted edges which determines the percentage of edges in the pathway that the specific individual is

603 significantly disrupted in. (3) Pathway specific percentage of disrupted nodes which evaluate the  
604 percentage of disrupted nodes for a specific individual out of all module nodes.

605 For binary classification of disrupted pathways, we quantify the disruption measure across a range of  
606 percentile values in each parameter. For each parameter, in each percentile, the selected positive  
607 disrupted modules were those that were disrupted in at least 50% of the non-responding patients and in  
608 less than 20% of the responders, or in cases where the difference between the percentage of disrupted  
609 non-responders to responders is higher than 50%. The top significantly positive disrupted modules were  
610 defined as those with a complete agreement of all three parameters in the highest percentile with shared  
611 selected pathways across all parameters, which in our case was determined as the 0.8 percentile.

## 612 **Single cell RNA sequencing**

### 613 **Peripheral blood mononuclear cells (PBMCs) cryopreservation and thawing**

614 Blood samples were drawn before IFX first infusion. PBMCs were isolated using density gradient  
615 centrifugation by spinning blood over UNI-SEPmaxi+ tubes (Novamed Ltd.) following the manufacturer's  
616 protocol. Isolated cells were resuspended in 1 ml freezing solution, containing 10% DMSO and 90% FCS.  
617 The samples were kept in Nalgene Mr. Frost® Cryo 1°C Freezing Container (ThermoFisher scientific) with  
618 Isopropyl alcohol at -80°C over-night, and immediately after placed in a liquid nitrogen container for long-  
619 term storage.

620 For thawing, frozen PBMCs were immediately transferred to a water bath at 37°C for 2-3 min, until a  
621 tiny ice crystal was remained. Thawed cells were transferred into 50 mL centrifuge tubes and rinsed with  
622 1 mL of warm (37 °C) RPMI 1640 supplemented with 10% of FCS which was added dropwise to the  
623 DMSO containing fraction while gently shaking the cells. Next, the cells were sequentially diluted by first  
624 adding 2 mL of medium followed by another 4, 8 and 16 mL respectively with 1 min wait between the  
625 four dilution steps. The diluted cell suspension was centrifuged for 5 min at 300 g. Most of the  
626 supernatant was discarded leaving ~1 ml, and the cells were resuspended in 9 ml of medium followed by  
627 additional centrifugation for 5 min at 300 g and resuspended with the same media to reach the desired  
628 cell concentration.

### 629 **Single cell RNA sequencing in 10X genomics platform**

630 PBMCs from responder and non-responder patients pre-treatment (N=2) were prepared for scRNA-seq  
631 according to the 10x Genomics Single Cell protocols for fresh frozen human peripheral blood mononuclear  
632 cells (see above for cell preservation and thawing). The cells were adjusted to a final cell concentration of  
633 1000 cells/µl and placed on ice until loading into the 10x Genomics Chromium system. The scRNA  
634 sequencing was performed in the genomic center of the biomedical core facility in the Rappaport faculty  
635 of medicine at the Technion - Israel Institute of Technology. Libraries were prepared using 10x Genomics  
636 Library Kits (Chromium Next GEM Single Cell 3' Library & Gel Bead Kit v3.1, PN-1000121) using 20,000  
637 input cells per sample. Single cell separation was performed using the Chromium Next GEM Chip G Single  
638 Cell Kit (PN-1000120). The RNAseq data was generated on Illumina NextSeq500, high-output mode  
639 (Illumina, FC-404-2005), 75 bp paired-end reads (Read1- 28 bp, Read2- 56 bp, Index- 8 bp).

### 640 **Single cell data analysis**

641 Cell Ranger single cell software suite was used for sample de-multiplexing, alignment to human reference  
642 genome (GRCh38-3.0.0), cell barcode processing and single cell UMI counting following default settings.  
643 The UMI count matrix was further processed using the Seurat R package (version 3.1.4). First, as a QC



644 step, cells that had a unique feature count of less than 200 were filtered out. Additional filtering was  
645 applied to remove features detected in less than 3 cells. we further filtered cells based on mitochondrial  
646 gene content above 0.25%. After this step, 19275 single cells and 20673 genes in total were retained and  
647 included in downstream analyses. This was followed by Global-scaling library size normalization. Genes  
648 were scaled in comparison to all other cells and regressed out the effects of unwanted sources of variation  
649 including UMI counts and percentage of mitochondrial genes for the remaining cells. At the next step, we  
650 performed linear dimensionality reduction on the scaled data of the top 2000 highly variable genes.  
651 Resampling test based on the jackstraw procedure and Elbow plot were performed to identify the first 30  
652 significance principal components that were used for downstream visualization by t-SNE plot.  
653 SingleR was used to annotate cell types based on correlation profiles with two different resolutions of  
654 cell classification using the Blueprint-Encode<sup>48</sup> and the Monaco Immune Cell<sup>49</sup> reference datasets of pure  
655 cell types. Differential expression analysis between responders and non-responders was performed for  
656 each cell population using a Wilcoxon Rank Sum test implemented in the FindAllMarkers function in the  
657 Seurat package.  
658 Relative pathway score based on the expended fiber-organization baseline differential genes was  
659 calculated for each single cell and compared between cell subsets and response groups using Wilcoxon  
660 test (for the expended fiber organization differential genes assessment see below description for selection  
661 and evaluation of predictive model for IFX treatment response; see the above description for relative  
662 pathway score calculation).  
663 To identify cell specific enriched pathways that are associated with the predictive fiber-organization  
664 related signature, we constructed a co-expression network based on the pre-treatment expression of the  
665 predictive genes: RAC1, PAK1, ICAM1, LYN, FCGR3A and IL-1 $\beta$ , in intermediate monocyte subset in each  
666 response group using the MTGOsc R package (Spearman's correlation, thinning net by 0.1 top percentile).  
667 Functional enrichment analysis was performed based on the co-expressed network nodes, by a  
668 hypergeometric test based on the Reactome database using the Clusterprofiler R package (P-adjust<0.05).  
669 Wilcoxon test was assessed to identify significant differences in pathway scores between response groups  
670 for each enriched pathway in each monocyte subset. P-values were further adjusted for multiple testing  
671 using the Benjamini-Hochberg procedure.

## 672 **Predictive model for IFX treatment response**

673 Given the significant linkage between monocytes and the differential fiber organization pathway, in order  
674 to build a cell specific pre-treatment classifier, we expanded the fiber organization adjusted-bulk based  
675 differential genes through intersection of knowledge based- (combined score>900,  
676 9606.protein.links.detailed.v11.0 from the STRING protein interaction database: <http://string-db.org/> and  
677 data-driven networks (Monocytes single-cell based co-expression from a representative responder and  
678 non-responder patients at baseline , Spearman's r, thinning percentile: 0.05, MTGOsc R package). This  
679 yielded a combined network of 42 edges containing 23 nodes. To build a predictive signature, we used  
680 elastic net regularized logistic regression for predictors selection, which has the advantage of including all  
681 correlated predictors sharing transcriptional signal (grouping effect), rather than selecting one variable  
682 from a group of correlated predictors while ignoring the others<sup>50</sup>. We used the glmnet R package  
683 implemented within the caret R package for model fitting by tuning over both alpha (ranging from 0.5-1,  
684 n=6) and lambda (ranging from 0.0001-1, n=20) parameters with 100 repeated 2-fold cross-validation.  
685 The optimized model was chosen based on the best performance value using the Receiver operating  
686 characteristic (ROC) metric (alpha=0.5, lambda=0.26).

687 After variable selection, we calculated AUC based on relative pathway score combining the selected genes  
688 using the pROC R package.

689 Internal validation was performed by bootstrapping (n=1000 bootstrap samples) for the AUC by randomly  
690 drawing subjects with the same sample size from the original cohort (with replacement).

691 A permutation test was used for estimating one-tailed P-value (n=10000 permutations) by shuffling the  
692 subject labels between the response groups and the expression of the selected signature genes. Then we  
693 tested the null hypothesis that the observed AUC was drawn from this null distribution.

#### 694 **External validation of the predictive signature using additional independent real-life IBD cohort**

695 For independent validation of the predictive signature, we used an independent IBD cohort of 29 patients  
696 (see Patient in the validation real life cohort). RNA was then extracted using RNeasy mini kit (QIAGEN)  
697 according to the manufacturer's instruction (for preservation and thawing of PBMCs see Peripheral blood  
698 mononuclear cells (PBMCs) cryopreservation). Complementary DNA was synthesized using Maxima first  
699 strand cDNA synthesis kit with dsDNase (Thermo Scientific). qPCR was performed using 7300 Real-Time  
700 PCR System (AB Applied Biosystems). Relative cytokine expression was calculated following normalization  
701 to glyceraldehyde-3 phosphate dehydrogenase (GAPDH) expression (Supp. table 10 for the PCR primer  
702 sets). Primers were purchased from Sigma Aldrich. The expression of the genes in the predictive signature  
703 was calculated relative to CD14 expression, to measure monocytes' centered differential expression  
704 between response groups pre-treatment. Relative pathway score was used to assess prediction  
705 performance (see Relative pathway score evaluation).

#### 706 **Assessment of the predictive signature performance in RA**

707 The prediction performance of the RAC1-PAK1 signature in RA public expression datasets was evaluated  
708 using the following datasets: GSE20690 (n=68 of which 43 and 25 are responders and non-responders  
709 respectively), GSE33377 (n=42 of which 18 and 24 are responders and non-responders respectively) and  
710 GSE42296 (n=19 of which 13 and 6 are responders and non-responders respectively).

711 Gene expression was adjusted to major cell type contributions (see Blood transcriptome analysis), which  
712 were evaluated by deconvolution using a linear regression framework in which individual samples were  
713 regressed based on a characteristic expression of marker genes expressed in 17 cell-types (CellMix R  
714 package). This was followed by performance prediction calculation for each study based on the relative  
715 signature score based on the adjusted gene expression. Due to differences in expression platforms  
716 between studies, there were genes in the signature which were not present in a specific dataset, therefore  
717 those genes were not used in the calculation of the relative signature score for the prediction of the  
718 specific study. To combine prediction performance from these independent studies we constructed a  
719 summary ROC curve (meta-ROC) using the nsROC R package which performs a simple linear interpolation  
720 between pairs of points of each individual ROC.

721

722 **Acknowledgments**

723 This work was supported by funding of the Helmsley Charitable Trust to Y.C and S.S.S-O. We thank  
724 T.Shvedov for contribution to patient enrollment and clinical data collection. S.Pollok, L.Pinzur,  
725 N.Molshatzki and Y.Benita for fruitful discussions and advice on the computational methodology. V.Barsan  
726 for his insightful comments in reviewing the manuscript.

727 **Author contributions**

728 S.S.S.-O, Y.C. conceived the idea; S.S.S-O, Y.C, S.G.V, E.S and R.G designed the analyses, S.S.S-O, Y.C. and  
729 S.G.V performed the interpretation; S.G.V and R.G performed the design and development of the  
730 computational pipeline and validation; A.K, B.P, Y.G and A.A performed development of the  
731 computational methodology; N.Ma, A.B, S.P and E.S counseled regarding the biological interpretation; E.S  
732 performed the experimental design of the collected cohort and E.S, N.Ma, A.A and T.D performed the  
733 data generation; A.B and N.Mi performed the experimental validation; A.B, S.P performed the sample  
734 collection; Y.C, H.B.Y and Y.G performed patient enrollment and clinical characterization; S.S.S-O, Y.C and  
735 S.G.V wrote the manuscript.

736 **Competing interests**

737 These authors disclose the following: Y.C received consulting fees from AbbVie, Janssen, Takeda, Pfizer  
738 and CytoReason; speaker fees from AbbVie, Janssen, and Takeda; and grants from AbbVie, Takeda and  
739 Janssen. S.S.S-O received grant fees from Takeda, S.S.S.-O, E.S. and R.G declares CytoReason equity and  
740 advisory fees. N. Ma and A.K are employees at CytoReason. S.G.V declares CytoReason advisory fees. The  
741 remaining authors disclose no conflicts.

742

## 743 References

744

- 745 1. Jiang, P. *et al.* Signatures of T cell dysfunction and exclusion predict cancer immunotherapy  
746 response. *Nat. Med.* (2018). doi:10.1038/s41591-018-0136-1
- 747 2. Murthy, S. K. *et al.* Introduction of anti-TNF therapy has not yielded expected declines in  
748 hospitalisation and intestinal resection rates in inflammatory bowel diseases: A population-based  
749 interrupted time series study. *Gut* (2020). doi:10.1136/gutjnl-2019-318440
- 750 3. Berns, M. & Hommes, D. W. Anti-TNF- $\alpha$  therapies for the treatment of Crohn's disease: the past,  
751 present and future. *Expert Opin. Investig. Drugs* (2015). doi:10.1517/13543784.2016.1126247
- 752 4. Mitoma, H., Horiuchi, T., Tsukamoto, H. & Ueda, N. Molecular mechanisms of action of anti-TNF-  
753  $\alpha$  agents – Comparison among therapeutic TNF- $\alpha$  antagonists. *Cytokine* (2018).  
754 doi:10.1016/j.cyto.2016.08.014
- 755 5. Roda, G., Jharap, B., Neeraj, N. & Colombel, J. F. Loss of Response to Anti-TNFs: Definition,  
756 Epidemiology, and Management. *Clinical and Translational Gastroenterology* (2016).  
757 doi:10.1038/ctg.2015.63
- 758 6. Seymour, H. E., Worsley, A., Smith, J. M. & Thomas, S. H. L. Anti-TNF agents for rheumatoid  
759 arthritis. *Br. J. Clin. Pharmacol.* (2001). doi:10.1046/j.1365-2125.2001.00321.x
- 760 7. Digby-Bell, J. L., Atreya, R., Monteleone, G. & Powell, N. Interrogating host immunity to predict  
761 treatment response in inflammatory bowel disease. *Nature Reviews Gastroenterology and*  
762 *Hepatology* (2020). doi:10.1038/s41575-019-0228-5
- 763 8. West, N. R. *et al.* Oncostatin M drives intestinal inflammation and predicts response to tumor  
764 necrosis factor–neutralizing therapy in patients with inflammatory bowel disease. *Nat. Med.* **23**,  
765 579–589 (2017).
- 766 9. Gaujoux, R. *et al.* Cell-centred meta-Analysis reveals baseline predictors of anti-TNF $\alpha$  non-  
767 response in biopsy and blood of patients with IBD. *Gut* **68**, 604–614 (2019).
- 768 10. Mulhearn, B., Barton, A. & Viatte, S. Using the immunophenotype to predict response to biologic  
769 drugs in rheumatoid arthritis. *Journal of Personalized Medicine* (2019). doi:10.3390/jpm9040046
- 770 11. Kuijjer, M. L., Tung, M. G., Yuan, G. C., Quackenbush, J. & Glass, K. Estimating Sample-Specific  
771 Regulatory Networks. *iScience* (2019). doi:10.1016/j.isci.2019.03.021
- 772 12. Liu, X., Wang, Y., Ji, H., Aihara, K. & Chen, L. Personalized characterization of diseases using  
773 sample-specific networks. *Nucleic Acids Res.* (2016). doi:10.1093/nar/gkw772
- 774 13. Liu, Y. *et al.* Cytokine-mediated regulation of activating and inhibitory Fc $\gamma$  receptors in human  
775 monocytes. *J. Leukoc. Biol.* (2005). doi:10.1189/jlb.0904532
- 776 14. Turner, M. & Billadeau, D. D. VAV proteins as signal integrators for multi-subunit immune-  
777 recognition receptors. *Nature Reviews Immunology* (2002). doi:10.1038/nri840
- 778 15. Zhao, X., Carnevale, K. A. & Cathcart, M. K. Human Monocytes Use Rac1, Not Rac2, in the NADPH  
779 Oxidase Complex. *J. Biol. Chem.* (2003). doi:10.1074/jbc.M302208200
- 780 16. Parikh, K. *et al.* Suppression of p21Rac signaling and increased innate immunity mediate  
781 remission in Crohn's disease. *Sci. Transl. Med.* (2014). doi:10.1126/scitranslmed.3006763
- 782 17. Kapellos, T. S. *et al.* Human monocyte subsets and phenotypes in major chronic inflammatory  
783 diseases. *Frontiers in Immunology* (2019). doi:10.3389/fimmu.2019.02035
- 784 18. Tanino, M. *et al.* Prediction of efficacy of anti-TNF biologic agent, infliximab, for rheumatoid  
785 arthritis patients using a comprehensive transcriptome analysis of white blood cells. *Biochem.*  
786 *Biophys. Res. Commun.* (2009). doi:10.1016/j.bbrc.2009.06.149
- 787 19. Toonen, E. J. M. *et al.* Validation study of existing gene expression signatures for anti-TNF  
788 treatment in patients with rheumatoid arthritis. *PLoS One* (2012).  
789 doi:10.1371/journal.pone.0033199
- 790 20. Mesko, B. *et al.* Peripheral blood derived gene panels predict response to infliximab in  
791 rheumatoid arthritis and Crohn's disease. *Genome Med.* (2013). doi:10.1186/gm463
- 792 21. Kalliolias, G. D. & Ivashkiv, L. B. TNF biology, pathogenic mechanisms and emerging therapeutic  
793 strategies. *Nat. Rev. Rheumatol.* (2016). doi:10.1038/nrrheum.2015.169

- 794 22. Lügering, A. *et al.* Infliximab induces apoptosis in monocytes from patients with chronic active  
795 Crohn's disease by using a caspase-dependent pathway. *Gastroenterology* (2001).  
796 doi:10.1053/gast.2001.28702
- 797 23. Batko, B., Schramm-Luc, A., Skiba, D. S., Mikolajczyk, T. P. & Siedlinski, M. TNF- $\alpha$  inhibitors  
798 decrease classical CD14 hi cd16- monocyte subsets in highly active, conventional treatment  
799 refractory rheumatoid arthritis and ankylosing spondylitis. *Int. J. Mol. Sci.* (2019).  
800 doi:10.3390/ijms20020291
- 801 24. Vos, A. C. W. *et al.* AntiTumor necrosis factor- $\alpha$  antibodies induce regulatory macrophages in an  
802 Fc region-dependent manner. *Gastroenterology* (2011). doi:10.1053/j.gastro.2010.10.008
- 803 25. Yokoyama, Y. *et al.* Efficacy of granulocyte and monocyte adsorptive apheresis in patients with  
804 inflammatory bowel disease showing lost response to infliximab. *J. Crohn's Colitis* (2020).  
805 doi:10.1093/ecco-jcc/jjaa051
- 806 26. Marei, H. & Malliri, A. Rac1 in human diseases: The therapeutic potential of targeting Rac1  
807 signaling regulatory mechanisms. *Small GTPases* (2017). doi:10.1080/21541248.2016.1211398
- 808 27. Muise, A. M. *et al.* Single nucleotide polymorphisms that increase expression of the guanosine  
809 triphosphatase RAC1 are associated with ulcerative colitis. *Gastroenterology* (2011).  
810 doi:10.1053/j.gastro.2011.04.057
- 811 28. Tiede, I. *et al.* CD28-dependent Rac1 activation is the molecular target of azathioprine in primary  
812 human CD4+ T lymphocytes. *J. Clin. Invest.* (2003). doi:10.1172/JCI16432
- 813 29. Lim, S. Z. & Chua, E. W. Revisiting the role of thiopurines in inflammatory bowel disease through  
814 pharmacogenomics and use of novel methods for therapeutic drug monitoring. *Frontiers in*  
815 *Pharmacology* (2018). doi:10.3389/fphar.2018.01107
- 816 30. Hamerman, J. A., Ni, M., Killebrew, J. R., Chu, C. L. & Lowell, C. A. The expanding roles of ITAM  
817 adapters FcR $\gamma$  and DAP12 in myeloid cells. *Immunological Reviews* (2009). doi:10.1111/j.1600-  
818 065X.2009.00841.x
- 819 31. Louis, E. *et al.* Association between polymorphism in IgG Fc receptor IIIa coding gene and  
820 biological response to infliximab in Crohn's disease. *Aliment. Pharmacol. Ther.* (2004).  
821 doi:10.1111/j.1365-2036.2004.01871.x
- 822 32. Moroi, R. *et al.* FCGR3A-158 polymorphism influences the biological response to infliximab in  
823 Crohn's disease through affecting the ADCC activity. *Immunogenetics* (2013).  
824 doi:10.1007/s00251-013-0679-8
- 825 33. McRae, B. L. *et al.* Fc receptor-mediated effector function contributes to the therapeutic  
826 response of anti-TNF monoclonal antibodies in a mouse model of inflammatory bowel disease. *J.*  
827 *Crohn's Colitis* (2016). doi:10.1093/ecco-jcc/jjv179
- 828 34. Chen, Y., Li, H., Lai, L., Feng, Q. & Shen, J. Identification of Common Differentially Expressed  
829 Genes and Potential Therapeutic Targets in Ulcerative Colitis and Rheumatoid Arthritis. *Front.*  
830 *Genet.* (2020). doi:10.3389/fgene.2020.572194
- 831 35. Chen, J. Y. *et al.* Association of FCGR3A and FCGR3B copy number variations with systemic lupus  
832 erythematosus and rheumatoid arthritis in Taiwanese patients. *Arthritis Rheumatol.* (2014).  
833 doi:10.1002/art.38813
- 834 36. Roberts, J. T., Patel, K. R. & Barb, A. W. Site-specific N-glycan Analysis of Antibody-binding Fc  $\gamma$   
835 Receptors from Primary Human Monocytes. *Mol. Cell. Proteomics* (2020).  
836 doi:10.1074/mcp.RA119.001733
- 837 37. Herter, S. *et al.* Glycoengineering of Therapeutic Antibodies Enhances Monocyte/Macrophage-  
838 Mediated Phagocytosis and Cytotoxicity. *J. Immunol.* (2014). doi:10.4049/jimmunol.1301249
- 839 38. Kotliarov, Y. *et al.* Broad immune activation underlies shared set point signatures for vaccine  
840 responsiveness in healthy individuals and disease activity in patients with lupus. *Nat. Med.*  
841 (2020). doi:10.1038/s41591-020-0769-8
- 842 39. Goh, K. II *et al.* The human disease network. *Proc. Natl. Acad. Sci. U. S. A.* (2007).  
843 doi:10.1073/pnas.0701361104
- 844 40. Singh, S., George, J., Boland, B. S., Castele, N. Vande & Sandborn, W. J. Primary non-response to

- 845 tumor necrosis factor antagonists is associated with inferior response to second-line biologics in  
846 patients with Inflammatory bowel diseases: A systematic review and meta-analysis. *J. Crohn's*  
847 *Colitis* (2018). doi:10.1093/ecco-jcc/jjy004
- 848 41. Rosen, M. J., Minar, P. & Vinks, A. A. Review article: Applying pharmacokinetics to optimise  
849 dosing of anti-TNF biologics in acute severe ulcerative colitis. *Alimentary Pharmacology and*  
850 *Therapeutics* (2015). doi:10.1111/apt.13175
- 851 42. Sarikaya, I. *et al.* Tc-99m dextran and Tc-99m HIG findings in patients with ulcerative colitis. *Clin.*  
852 *Nucl. Med.* (1999). doi:10.1097/00003072-199904000-00005
- 853 43. Finck, R. *et al.* Normalization of mass cytometry data with bead standards. *Cytom. Part A* (2013).  
854 doi:10.1002/cyto.a.22271
- 855 44. Bruggner, R. V., Bodenmiller, B., Dill, D. L., Tibshirani, R. J. & Nolan, G. P. Automated  
856 identification of stratifying signatures in cellular subpopulations. *Proc. Natl. Acad. Sci. U. S. A.*  
857 (2014). doi:10.1073/pnas.1408792111
- 858 45. N., P. *et al.* Usefulness of transcriptional blood biomarkers as a non-invasive surrogate marker of  
859 mucosal healing and endoscopic response in ulcerative colitis. *J. Crohn's Colitis* (2017).  
860 doi:10.1093/ecco-jcc/jjx091 LK -  
861 <http://sfx.cineca.it:9003/unito?sid=EMBASE&sid=EMBASE&issn=18764479&id=doi:10.1093%2Fecco-jcc%2Fjjx091&atitle=Usefulness+of+transcriptional+blood+biomarkers+as+a+non-invasive+surrogate+marker+of+mucosal+healing+and+endoscopic+response+in+ulcerative+colitis&stitle=J.+Crohn%27s+Colitis&title=Journal+of+Crohn%27s+and+Colitis&volume=11&issue=11&spage=1335&epage=1346&aulast=Planell&aufirst=N%C3%BAria&auinit=N.&aufull=Planell+N.&coden=&isbn=&pages=1335-1346&date=2017&auin>
- 862  
863  
864  
865  
866
- 867 46. Li, S. *et al.* Molecular signatures of antibody responses derived from a systems biology study of  
868 five human vaccines. *Nat. Immunol.* **15**, 195–204 (2014).
- 869 47. Tsang, J. S. *et al.* Global analyses of human immune variation reveal baseline predictors of  
870 postvaccination responses. *Cell* (2014). doi:10.1016/j.cell.2014.03.031
- 871 48. Fernández, J. M. *et al.* The BLUEPRINT Data Analysis Portal. *Cell Syst.* (2016).  
872 doi:10.1016/j.cels.2016.10.021
- 873 49. Xu, W. *et al.* Mapping of  $\gamma/\delta$  T cells reveals  $V\delta 2+$  T cells resistance to senescence. *EBioMedicine*  
874 (2019). doi:10.1016/j.ebiom.2018.11.053
- 875 50. Zou, H. & Hastie, T. Regularization and variable selection via the elastic net. *J. R. Stat. Soc. Ser. B*  
876 *Stat. Methodol.* (2005). doi:10.1111/j.1467-9868.2005.00503.x
- 877

## 878 **Figure titles and legends**

879 **Fig 1| External data-driven disease specific molecular response metric, termed ‘inflammatory axis’,**  
880 **indicated that responders exhibit a trajectory of treatment-induced immune dynamics while non-**  
881 **responders exhibit an overall opposite direction. a,** Overview of the ‘inflammatory axis’ analysis. **b,**  
882 ‘Inflammatory axis’ assessment. Left panel, external public (GSE94648) based ‘inflammatory axis’ which  
883 defines a transition from IBD active disease through inactive disease to healthy state by PCA based  
884 differential expressed genes between disease/health states. Right panel, the projection distance of  
885 responding and non-responding patients’ samples from our real-life cohort on the ‘inflammatory axis’ at  
886 W2 compared to baseline. **c,** Boxplots comparing responders’ and non-responders’ projection dynamics  
887 on the ‘inflammatory axis’ at each treatment interval (One-tailed permutation P-values shown, n=10000).  
888 **d,** Scatterplot of the relationship between progress on the ‘inflammatory axis’ between W2 to baseline  
889 and between W2 to W14 (n=23, Spearman’s  $r=-0.44$ ,  $P<0.1$ ).

890 **Fig 2| Normal infliximab dynamics correlated with changes in monocytes and reduced expression of**  
891 **innate immune related pathways. a,** Cell frequency alterations following IFX treatment. Left panel, PCA  
892 presenting immune cell frequency changes following treatment based on 16 canonical immune  
893 populations determined by CyTOF. Arrow tail and head indicate the early W2 and later W14 relative to  
894 baseline compositional changes correspondingly. Ellipses represent the Euclidean distance from the  
895 center. Center panel, boxplots showing change in monocytes abundance following treatment relative to  
896 baseline in responders and non-responders (paired-Wilcoxon P-values shown). Right panel, scatterplot  
897 showing the relationship between changes in monocytes abundance (log transformed fold change relative  
898 to baseline) and changes in CRP (fold change relative to baseline) (n=23, Spearman correlation=0.4,  
899  $P=0.01$ ). **b,** Venn diagram showing dynamic features which significantly changed over time at 2 weeks and  
900 14 weeks post treatment compared with baseline for each response group using linear mixed-effects  
901 models (FDR<0.15, n=1000 & n=519 permutations for responders and non-responders respectively). **c,**  
902 Scatterplot presenting the normal response network centrality of significantly enriched dynamic pathways  
903 at the early response period (GSEA, FDR<0.25, n perm=1000). Colors indicate pathway median fold change  
904 expression at the early response period relative to baseline in responders (colored dots denote significant  
905 change in relative pathway score by Wilcoxon test, FDR<0.05).

906 **Fig 3| ‘Disruption Networks’ as a framework to perform sample level inferences to identify individual**  
907 **variation in drug response. a,** ‘Disruption Networks’ concept and applications. Bulk gene expression  
908 constitutes both effects of cell composition and cell-specific regulatory programs. ‘Disruption Networks’  
909 initially decouples cell composition and cell-specific regulatory programs from bulk gene expression  
910 providing a cell-centered regulatory network of genes and cells. Then, ‘Disruption Networks’ learns  
911 individual-level breaking or rewiring of cross-feature relations, and by that forms a new data-type  
912 providing complementary biological information which increase signal detection. The new data-type can  
913 be used for diverse downstream analyses including data integration that accounts for both dimensions of  
914 feature expression and relation levels, disruption assessment in functional modules, stratification of  
915 patients by disruption profile, assessment of perturbation effects by measuring disruption level  
916 throughout the network. **b,** Feature specific differential signal between responders and non-responders  
917 dynamics at the early response period using disruption measurement of top mean drop intensity (x axis)  
918 and standard statistics by Wilcoxon test (y axis). **c,** ‘Disruption Networks’ statistic was aggregated across  
919 pathways to estimate sample specific disruption in the functional level, according to mean drop intensity,  
920 a representative disruption parameter out of three different defined parameters. The heatmap represents  
921 the disrupted dynamics for each pathway and sample at W2 compared to baseline. Top significantly  
922 disrupted pathways are presented, defined as those with a complete agreement of all three parameters  
923 in the 0.8 percentile. Line graphs describe the percentage of disrupted patients in each response group.  
924 **d,** Distribution of degree and betweenness centrality for nodes belonging to the top disrupted pathways  
925 compared to other nodes in the network. Significance was determined using permutation test (n

926 perm=10000). **e**, Meta disrupted pathway. Left panel, response network subgraph consist of nodes from  
927 the baseline differential disrupted pathways (FDR<0.1). Diamond shape and orange color represent cell  
928 frequency; circle shape represent cell centered expression; Red circles indicate the fiber organization  
929 pathway related central axis. Right panel, enrichment analysis of the disrupted pathways by  
930 hypergeometric test.

931 **Fig. 4 | Fiber-organization signaling, highly expressed in monocytes, predicts infliximab response at**  
932 **baseline.** **a**, Baseline expression differences in the disrupted pathways between response groups  
933 (NPMANOVA; bottom primary axis). Colors denote response network betweenness. The line graph  
934 represent correlation of changes in pathway score with changes in CRP (top secondary axis). **b**, The fiber  
935 organization differential nodes dynamics assessed by mean relative score across visits for each response  
936 group (Wilcoxon one-tailed P-values shown). **c**, Analysis of the cellular origin of the baseline differential  
937 fiber organization pathway using scRNA-seq analysis of PBMCs collected from representative responder  
938 and non-responder pre-treatment. Left panel, tSNE plot representing cell types identities annotated using  
939 singleR based on correlation profiles based on two reference datasets: the Blueprint-Encode and the  
940 Monaco Immune Cell datasets. Right panel, tSNE plot colored by the expended fiber organization scaled  
941 expression. The fiber organization baseline differential genes were expended through intersecting  
942 knowledge based (stringDB) and data-driven based (Monocyte single cell data) networks. **d**, The expended  
943 fiber organization scaled expression in the different monocyte subsets (Wilcoxon P-values shown). **e**,  
944 Mean mTNF expression in the different monocyte subsets as measured by CyTOF (Wilcoxon one-tailed P-  
945 values shown).

946 **Fig. 5 | Validation of the fiber organization predictive signature in an independent IBD cohort and three**  
947 **public RA cohorts pre IFX treatment.** **a**, Validation of the pre-treatment predictive fiber organization  
948 signature in an additional independent cohort of 20 and 9 responders and non-responders respectively  
949 by qPCR. Gene values were normalized to CD14 expression for cell-centered values. Left panel, bar graph  
950 of the pre-treatment normalized expression of the signature genes and signature pathway score in each  
951 response group (Wilcoxon one-tailed P-values shown). Right panel, ROC based on the predictive signature  
952 relative score. **b**, Prediction performance of fiber organization signaling signature in RA public expression  
953 datasets. Left panel, boxplots comparing the fiber organization signature related genes and the pathway  
954 score between IFX RA responders (n=43) and non-responders (n=25) in a representative public dataset  
955 GSE20690 (Wilcoxon one-tailed P-values shown). Right panel, ROC based on the predictive signature  
956 relative score of the relevant cohort. **c**, Meta-ROC presenting the predictive performance of three  
957 independent public RA cohorts.  
958



## 959 Supplemental Information titles and legends

960 **Supp. Fig 1| CyTOF reveals multiple cell subset changes in responders following treatment and**  
961 **differences between response groups. a,** Loading plot of PC2 based on major canonical cell composition  
962 changes at W2 and W14 compared to baseline. **b,** Cell-type specific alteration in cellular relative  
963 abundance during IFX treatment in responders and non-responders (paired-Wilcoxon P-values shown). **c,**  
964 Correlation of cell abundance changes at W2 and W14 relative to baseline, with changes in CRP  
965 (Spearman's correlation coefficients are shown, P-values are calculated by two tailed probability of the t-  
966 statistic,  $P < 0.05$  for significant p-values).

967 **Supp. Fig 2| The cumulative number of discovered dynamic features, at a range of target FDR values by**  
968 **data-type for each response group.** Top and bottom panels represent significant changes at W2 and W14  
969 relative to baseline respectively. FDR was calculated using the Benjamini-Hochberg procedure.  
970 Responders were subsampled ( $n=200$ ) to match the non-responder group size. For responders,  $\text{mean} \pm$   
971 SEM values are shown.

972 **Supp. Fig 3| Functional pathways associated with IFX response. a,** Scatterplot of p-values obtained by a  
973 comparison of pathway scores between W2 and baseline against those obtained by comparing W14 to  
974 baseline ( $-\log_{10}$  of paired-Wilcoxon P-values shown). Only globally enriched and network connected  
975 pathways were included. **b,** Pathway score related dynamics between W2 and W14 relative to baseline.  
976 Top 70 pathways are shown. Pathways are ordered by fold change effect size. P-values for pathway score  
977 differences between time points were calculated by paired-Wilcoxon test. Significance was determined  
978 by  $\text{FDR} < 0.05$  (Benjamini-Hochberg procedure). **c,** Heatmap representing a cell-specific contribution for  
979 the change in the dynamic pathways. The contribution was determined for each gene in the pathway by  
980 regressing its unadjusted fold change expression over the major peripheral cell type frequencies. The  
981 reported values represent the mean of the coefficients across all genes in the pathway. **d,** Correlation of  
982 pathway score expression with CRP. All time point and response groups are included. (Spearman's  
983 correlation coefficients are shown, P-values are calculated by two tailed probability of the t-statistic,  
984 Pathway which significantly correlated with CRP ( $\text{FDR} < 0.05$ , Benjamini-Hochberg procedure) are colored.

985 **Supp. Fig 4| Additional disruption parameters and comparison of the differential signal between**  
986 **response groups dynamics as obtained by the 'Disruption Networks' framework and standard statistics.**  
987 **a,** Representative highly disrupted edge demonstrating significant dropout values for non-responders. **b,**  
988 Feature-specific differential signal between responders and non-responders' dynamics at W2 relative to  
989 baseline, based on the disruption parameters and standard statistics. Left panel, top disrupted edge ratio  
990 (x axis,  $\text{FDR} < 0.1$  for dropout significance and  $10^{\text{th}}$  top percentile of disrupted edge ratio) and standard  
991 statistics by Wilcoxon test (y axis,  $\text{FDR} < 0.1$ ); Right panel, Scatterplot showing feature specific disruption  
992 parameters of mean drop intensity against disrupted edge ratio. Points are colored by quartile thresholds  
993 ( $\text{FDR} < 0.1$  for dropout significance and  $10^{\text{th}}$  top percentile of the specific disruption parameter). The  
994 feature which agreed with the disruption parameters and standard Wilcoxon test is marked with black  
995 border. **c,** Aggregation of 'Disruption Networks' statistic across pathways to estimate sample specific  
996 disruption in the functional level, according to percentage of disrupted edges and percentage of disrupted  
997 nodes. Heatmaps represent the disrupted dynamics in each parameter for each pathway and sample at  
998 W2 compared to baseline. Top significantly disrupted pathways are presented, defined as those with a  
999 complete agreement of all three parameters in the 0.8 percentile. Line graphs describe the percentage of  
1000 disrupted patients in each response group.

1001 **Supp. Fig 5| Baseline differences of the significantly dynamics disrupted pathways. a,** Heatmap  
1002 representing the feature-level baseline differences among genes in the dynamics meta-disrupted pathway  
1003 ( $\text{FDR} < 0.1$ , Wilcoxon test). **b,** Correlation between the canonical cellular frequencies as obtained by CyTOF,  
1004 and the bulk unadjusted expression of the fiber organization related genes in responders (Spearman's  
1005 correlation coefficients are shown, P-values are calculated by two tailed probability of the t-statistic). Only

1006 significant correlation values are shown ( $P < 0.05$  and  $|r| \geq 0.5$ ). **c.** Baseline prediction of IFX response in the  
1007 primary IFX cohort based on the expended fiber organization predictive signature score, in the cell  
1008 adjusted space. Left panel, receiver operating characteristic (ROC) plots of 200-bootsraps. The predictive  
1009 signature was determined using elastic net ( $\alpha=0.5$ ,  $\lambda=0.26$ , 100 repeated 2-fold CV) based on the  
1010 adjusted baseline differential fiber organization related genes. Significance was determined by  
1011 permutation test ( $n \text{ perm}=10000$ ). Right panel, boxplots of the fiber organization predictive signature  
1012 score pre-treatment, in the different response groups in the cell-centered bulk expression

1013 **Supp. Fig 6 | scRNA-seq based comparison of the baseline fiber organization related expression between**  
1014 **the main cell-types and response groups.** The fiber organization scaled score based on its baseline  
1015 differential genes was compared between PBMCs major cell types, and between response groups for  
1016 monocytes (Wilcoxon P-values shown).

1017 **Supp. Fig 7 | Intermediate monocytes functional pathways associated with the predictive fiber**  
1018 **organization signature.** Heatmap representing the top 20 intermediate-monocytes specific enriched  
1019 pathways associated with the predictive fiber-organization related signature is shown. Pathways were  
1020 determined by co-expression network based on the pre-treatment expression of the signature predictive  
1021 genes in intermediate monocyte based on the scRNA-seq data in each response group followed by  
1022 enrichment analysis (Spearman's correlation, thinning net by 0.1 top percentile,  $P\text{-adjust} < 0.05$  for  
1023 functional enrichment significance by hypergeometric test). Pathways displaying significant differences  
1024 between response groups in each cell subset are colored ( $FDR < 0.05$  by Wilcoxon test).  
1025

## 1026 **Supplementary Table titles**

1027 **ST1:** Clinical and demographic characteristics of patients included in the primary real life CD cohort

1028 **ST2:** CyTOF Panel

1029 **ST3:** Cell type unsupervised clustering using Citrus algorithm

1030 **ST4:** Luminex Panel. List of analytes tested in the Luminex assay

1031 **ST5:** Differentially expressed features between CD and UC active patients, and healthy controls for the  
1032 construction of an external reference 'inflammatory axis'

1033 **ST6:** Selection of highly informative PCs to best describe an inflammatory axis directionality from active,  
1034 through inactive disease states to healthy state using ordinal lasso

1035 **ST7:** Dynamic features at W2 and W14 relative to baseline in responders and non-responders using  
1036 linear mixed-effects models

1037 **ST8:** Normal anti-TNF response dynamics network at the early W2 response period

1038 **ST9:** Clinical and demographic characteristics of patients included in the validation real-life CD cohort

1039 **ST10:** qPCR primers used in the IBD validation cohort for measuring expression of the fiber organization  
1040 predictive signature

**Fig. 1****a**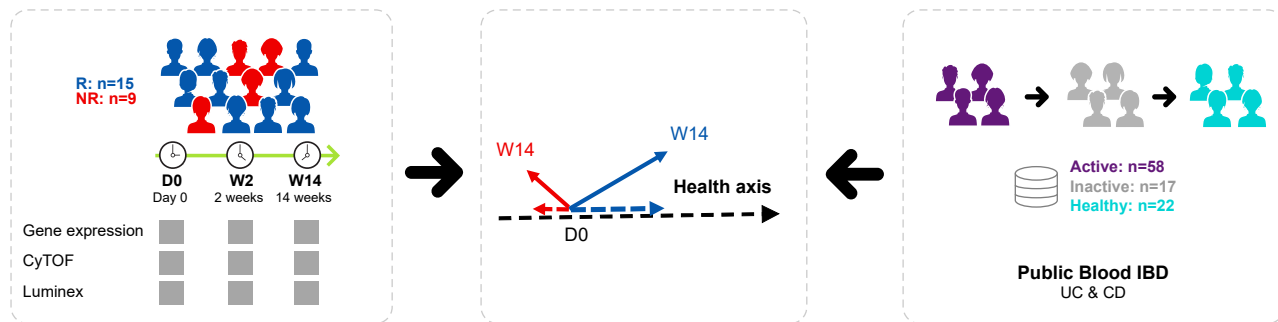**b**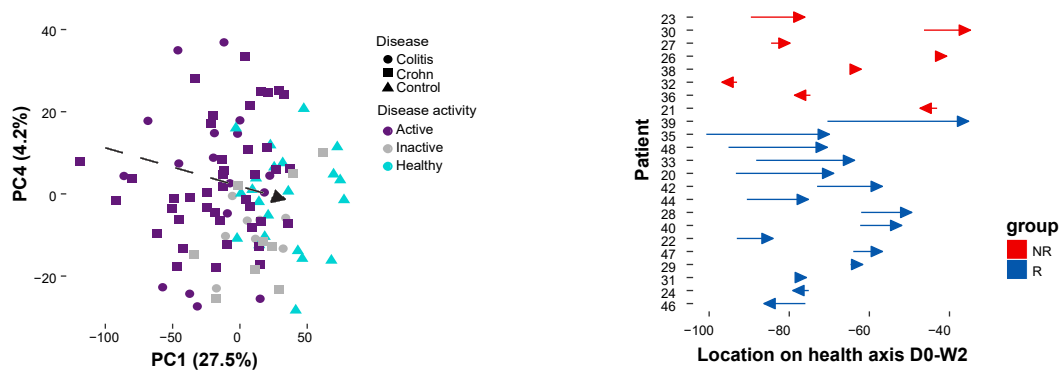**c**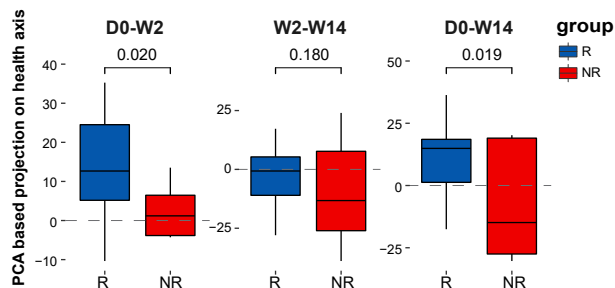**d**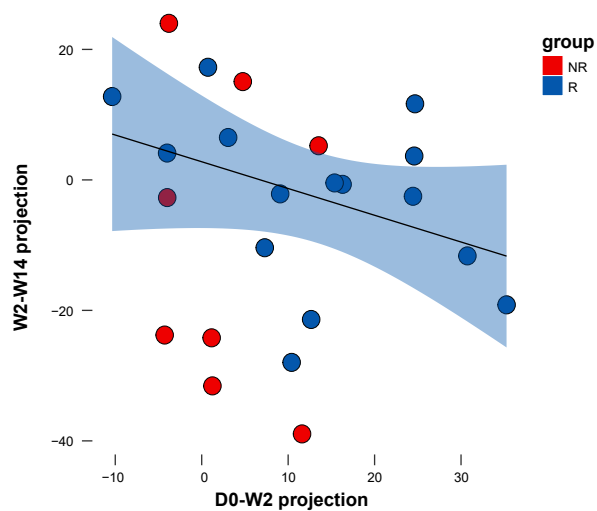

**Fig. 2****a**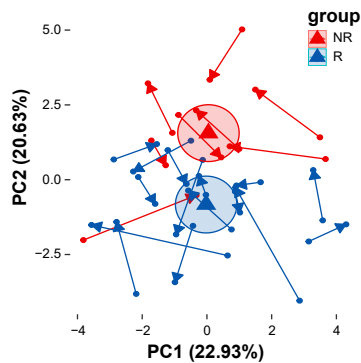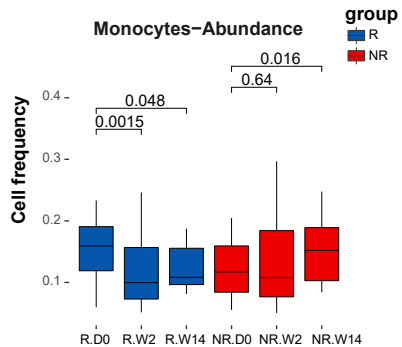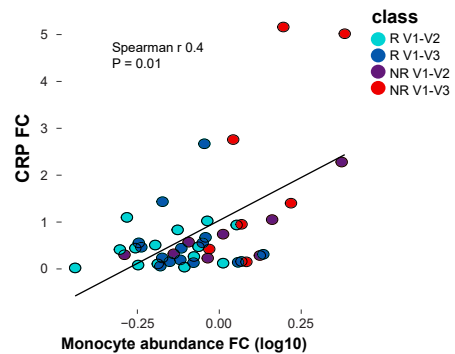**b**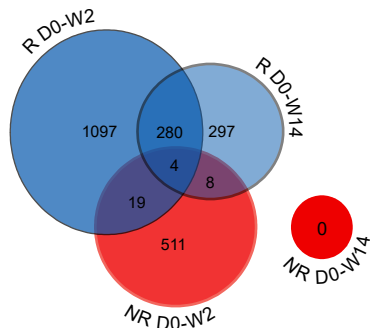**c**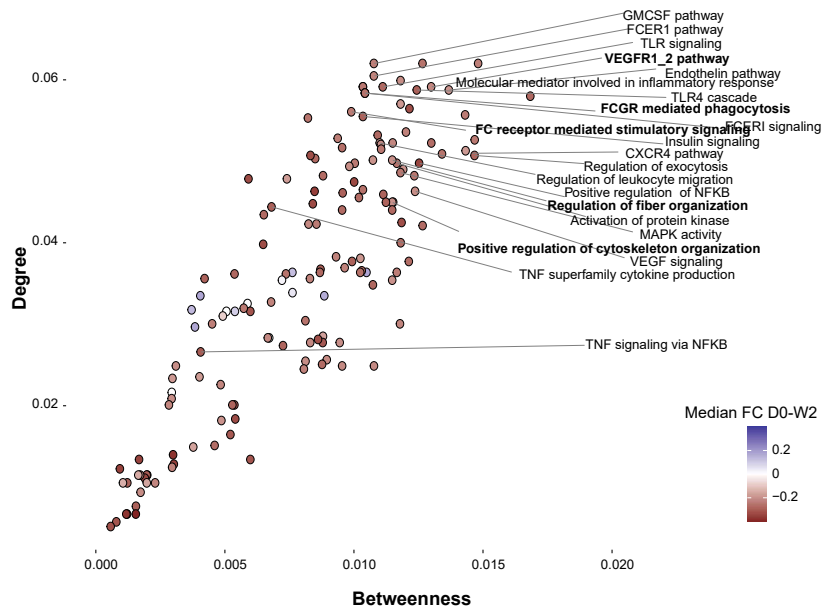

# Fig. 3

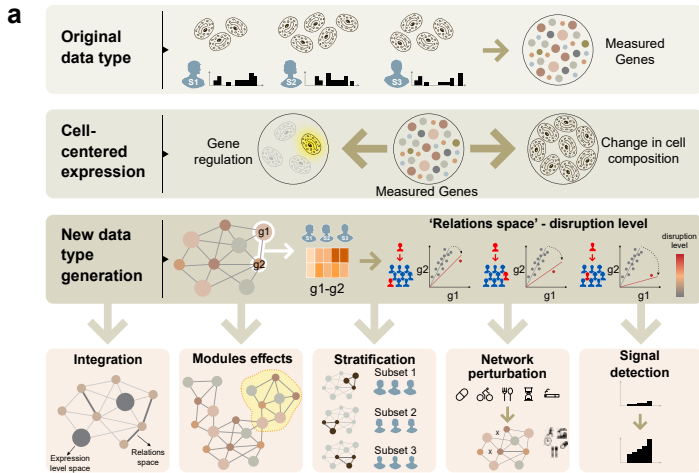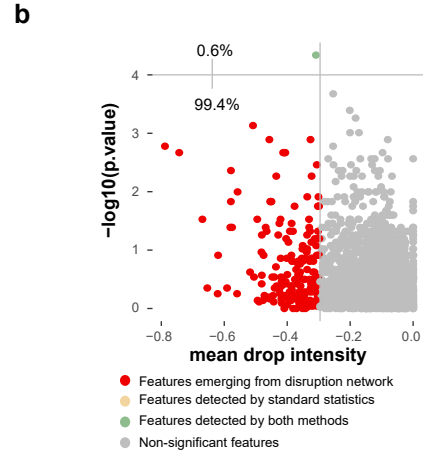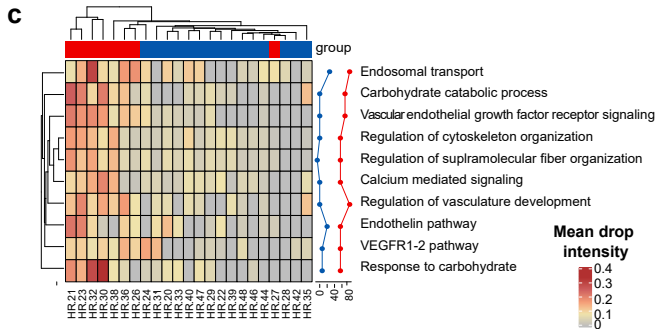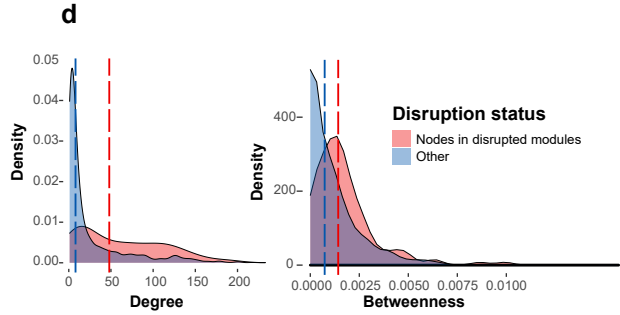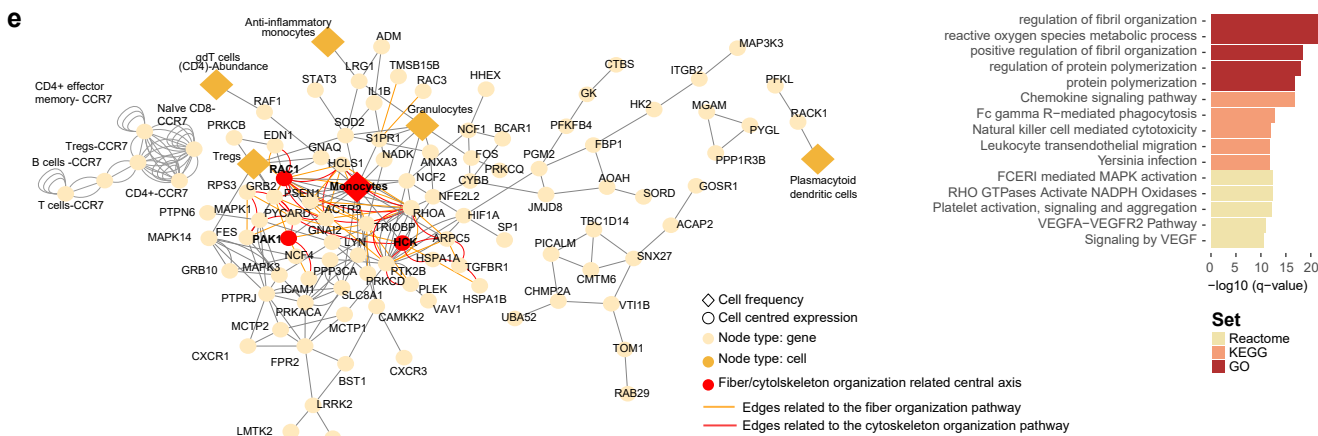

**Fig. 4****a**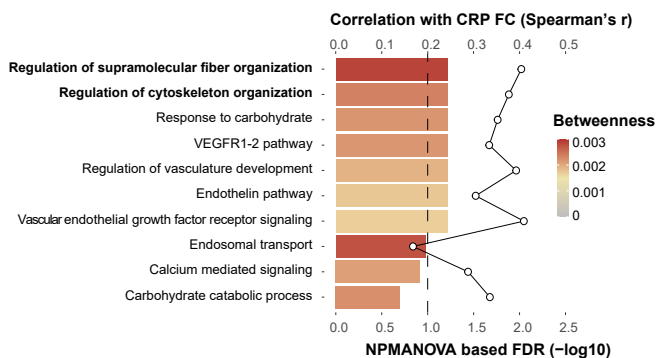**b**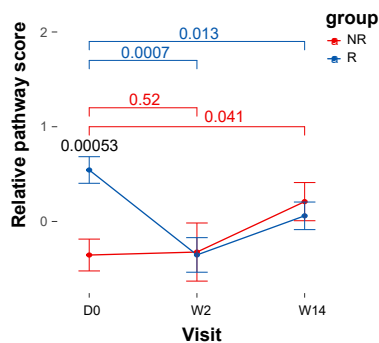**c**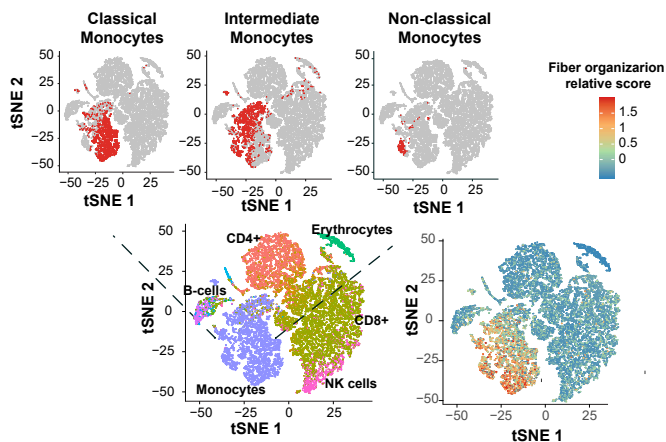**d**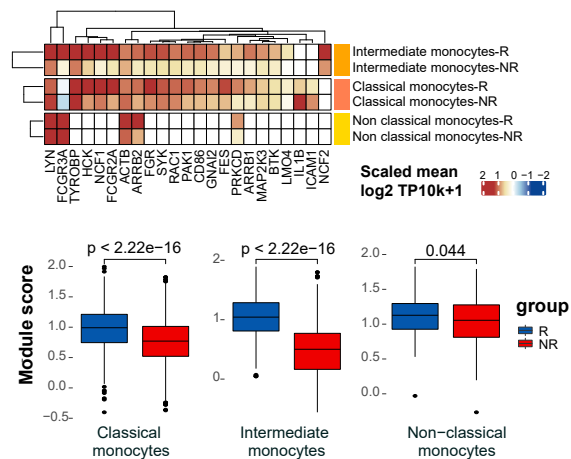**e**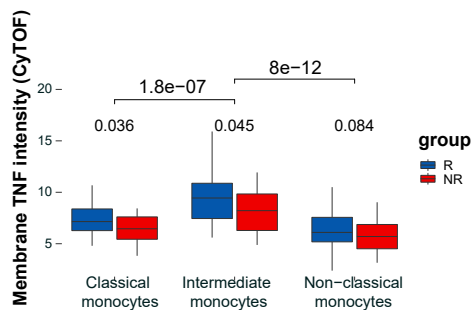

**Fig. 5****a**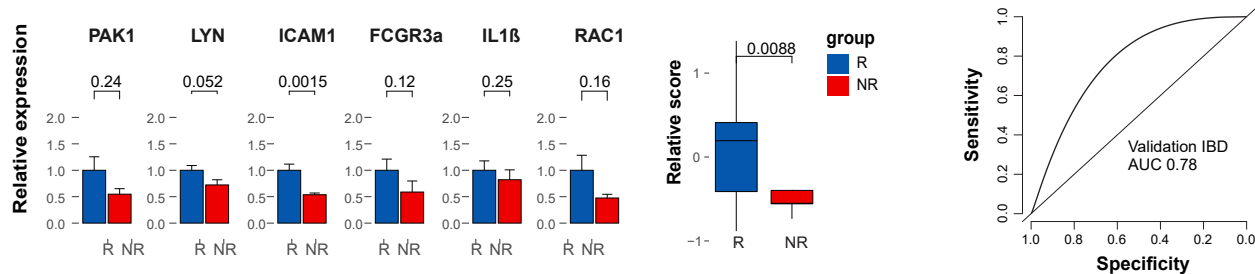**b**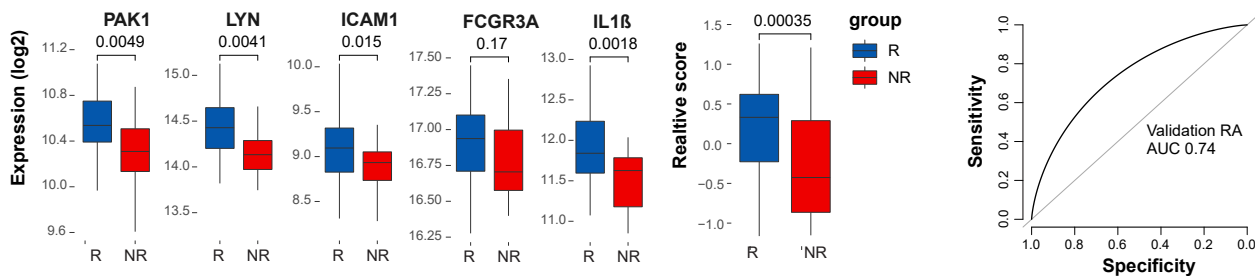**c**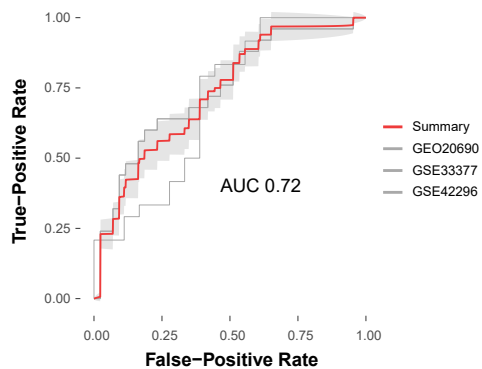

Source: https://www.biorxiv.org/content/10.1101/2021.06.16.448558v2.full.pdf
